# Supplementary material for: Pathway-specific model estimation for improved pathway annotation by network crosstalk
Source: PubMed Central journal article supplement (PMC7423893; doi:10.1038/s41598-020-70239-z), 2020-08-12

# Pathway-specific model estimation for improved pathway annotation by network crosstalk

*Miguel Castresana-Aguirre, Erik L.L. Sonnhammer\**

Department of Biochemistry and Biophysics, Stockholm University, Science for Life Laboratory, Box 1031, 17121 Solna, Sweden,

\*To whom correspondence should be addressed: erik.sonnhammer@dbb.su.se

**Supplementary Figure 1:** 10000 random gene sets of size 110 are run against KEGG pathways. P-value uniformity test of ANUBIX. Reported p-values are plotted against theoretical quantile (rank). Software: R version 3.4.3 <https://www.r-project.org/>.

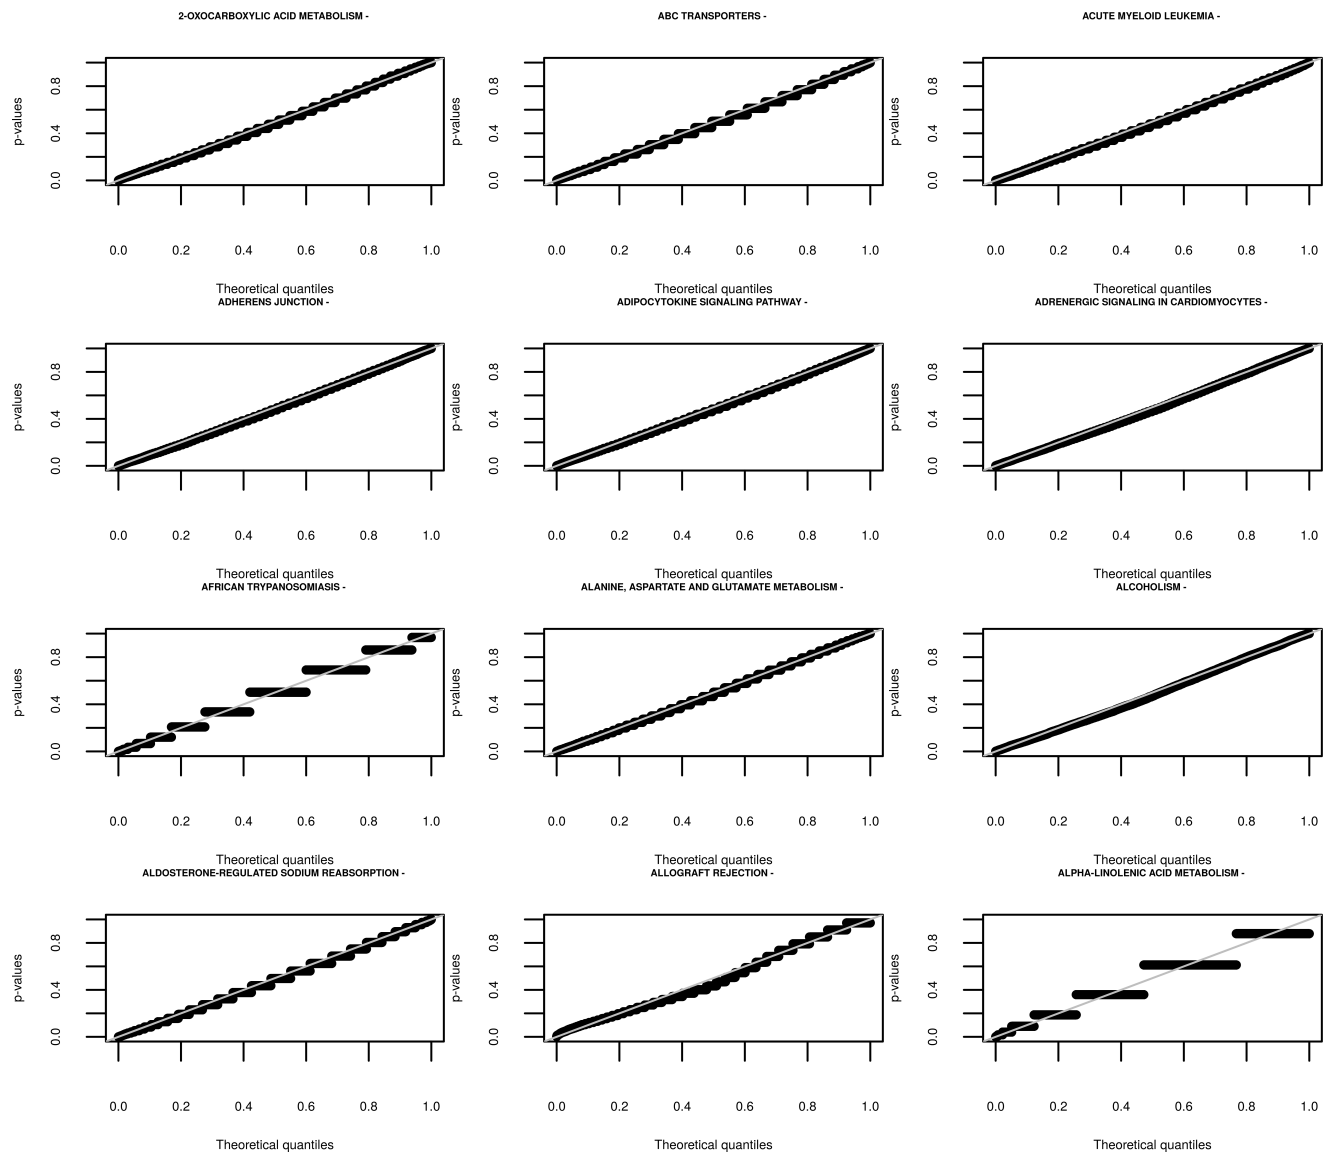

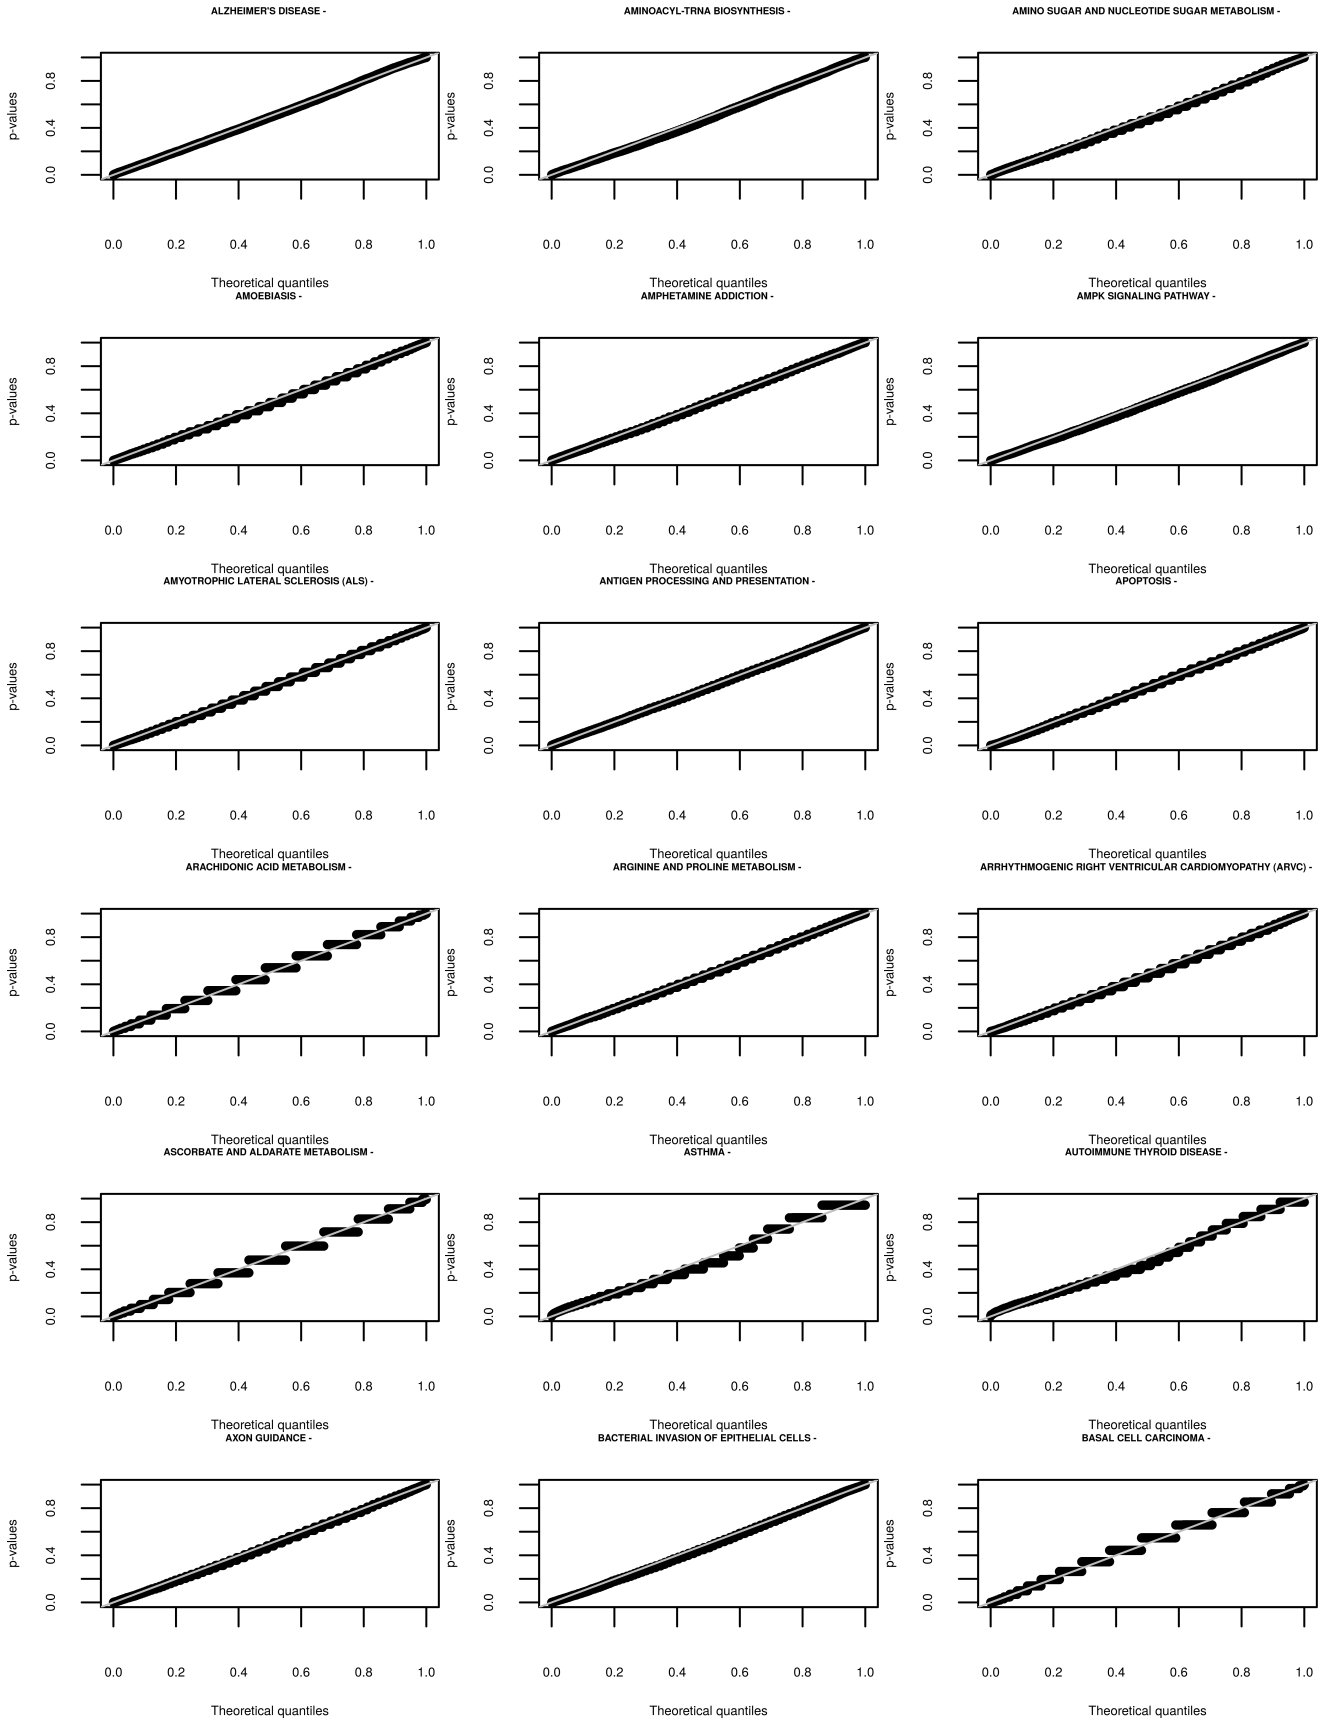

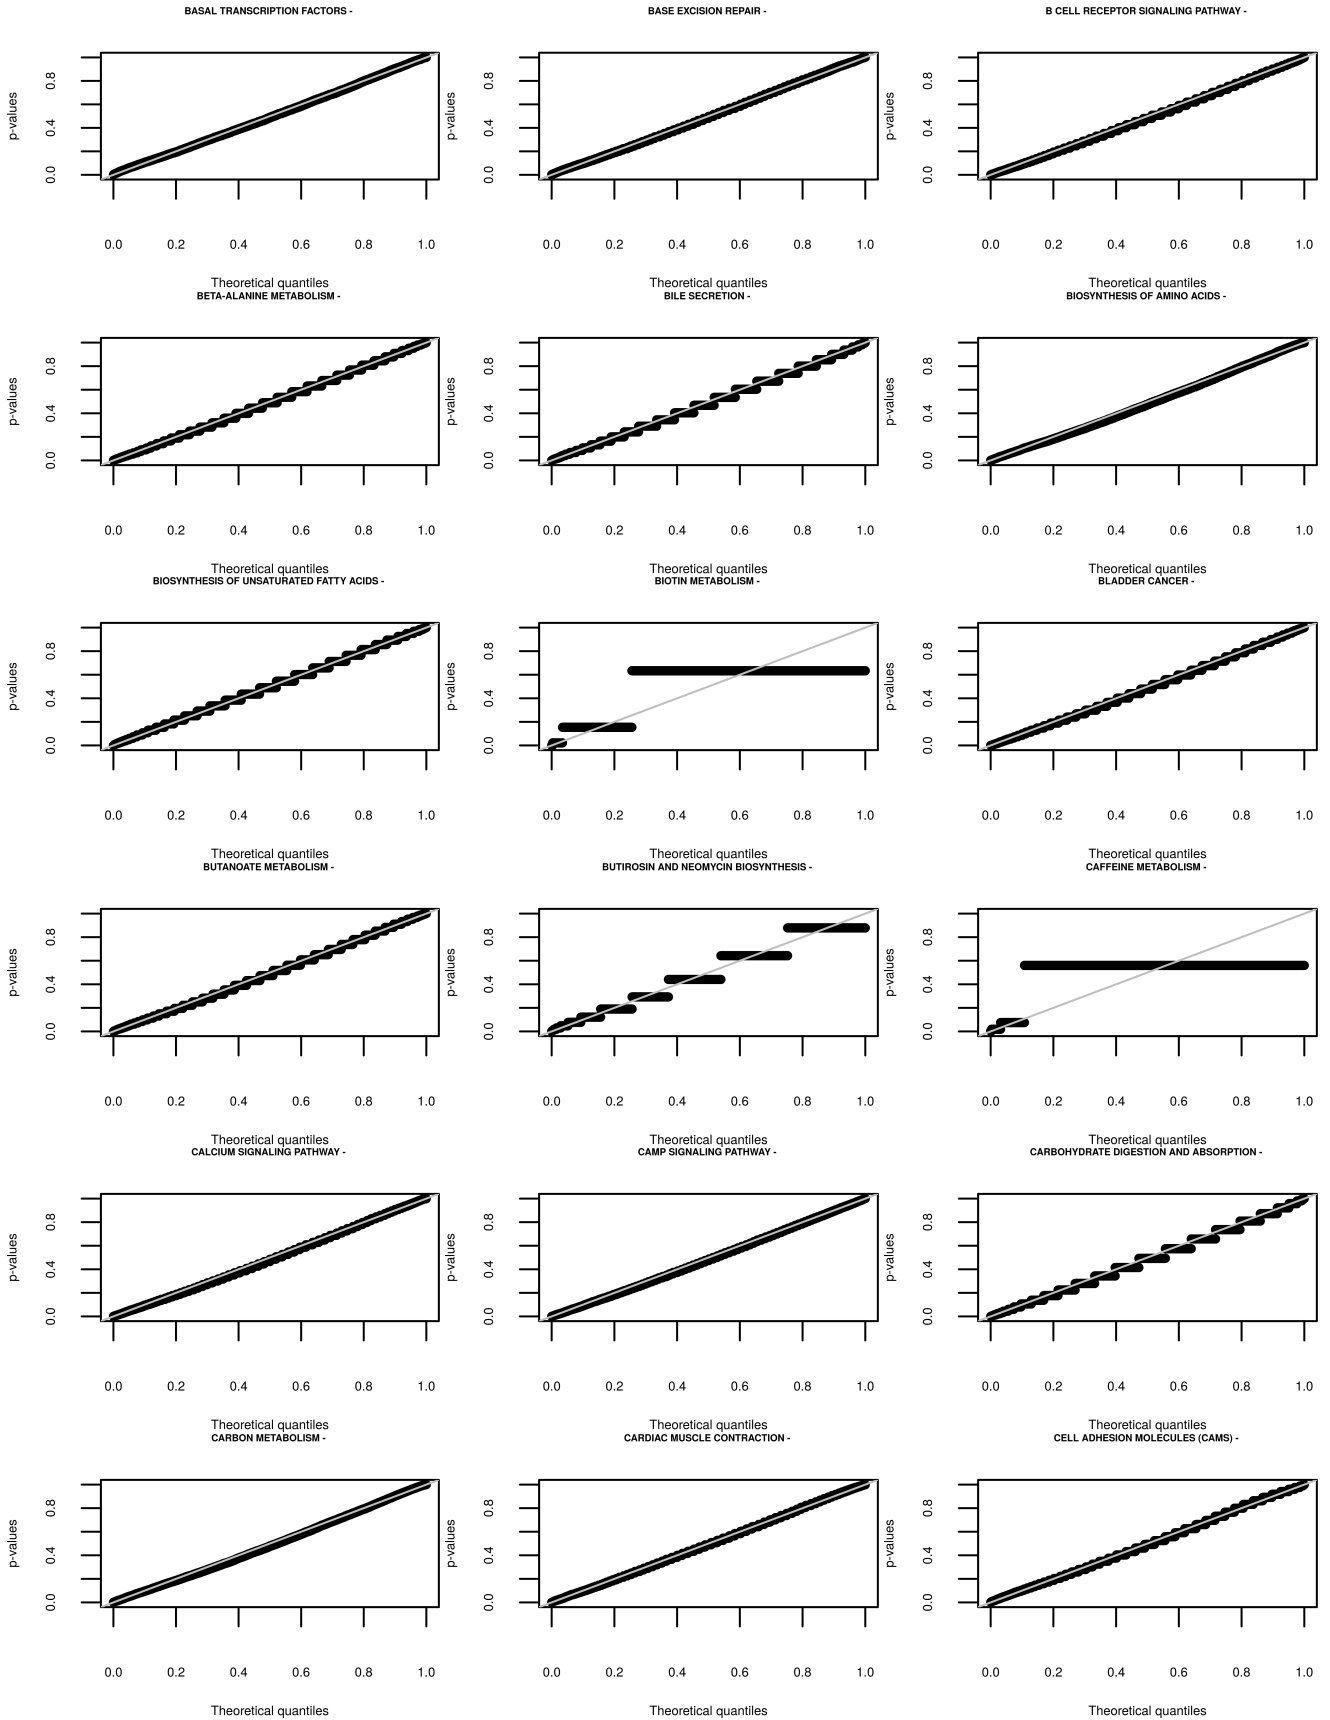

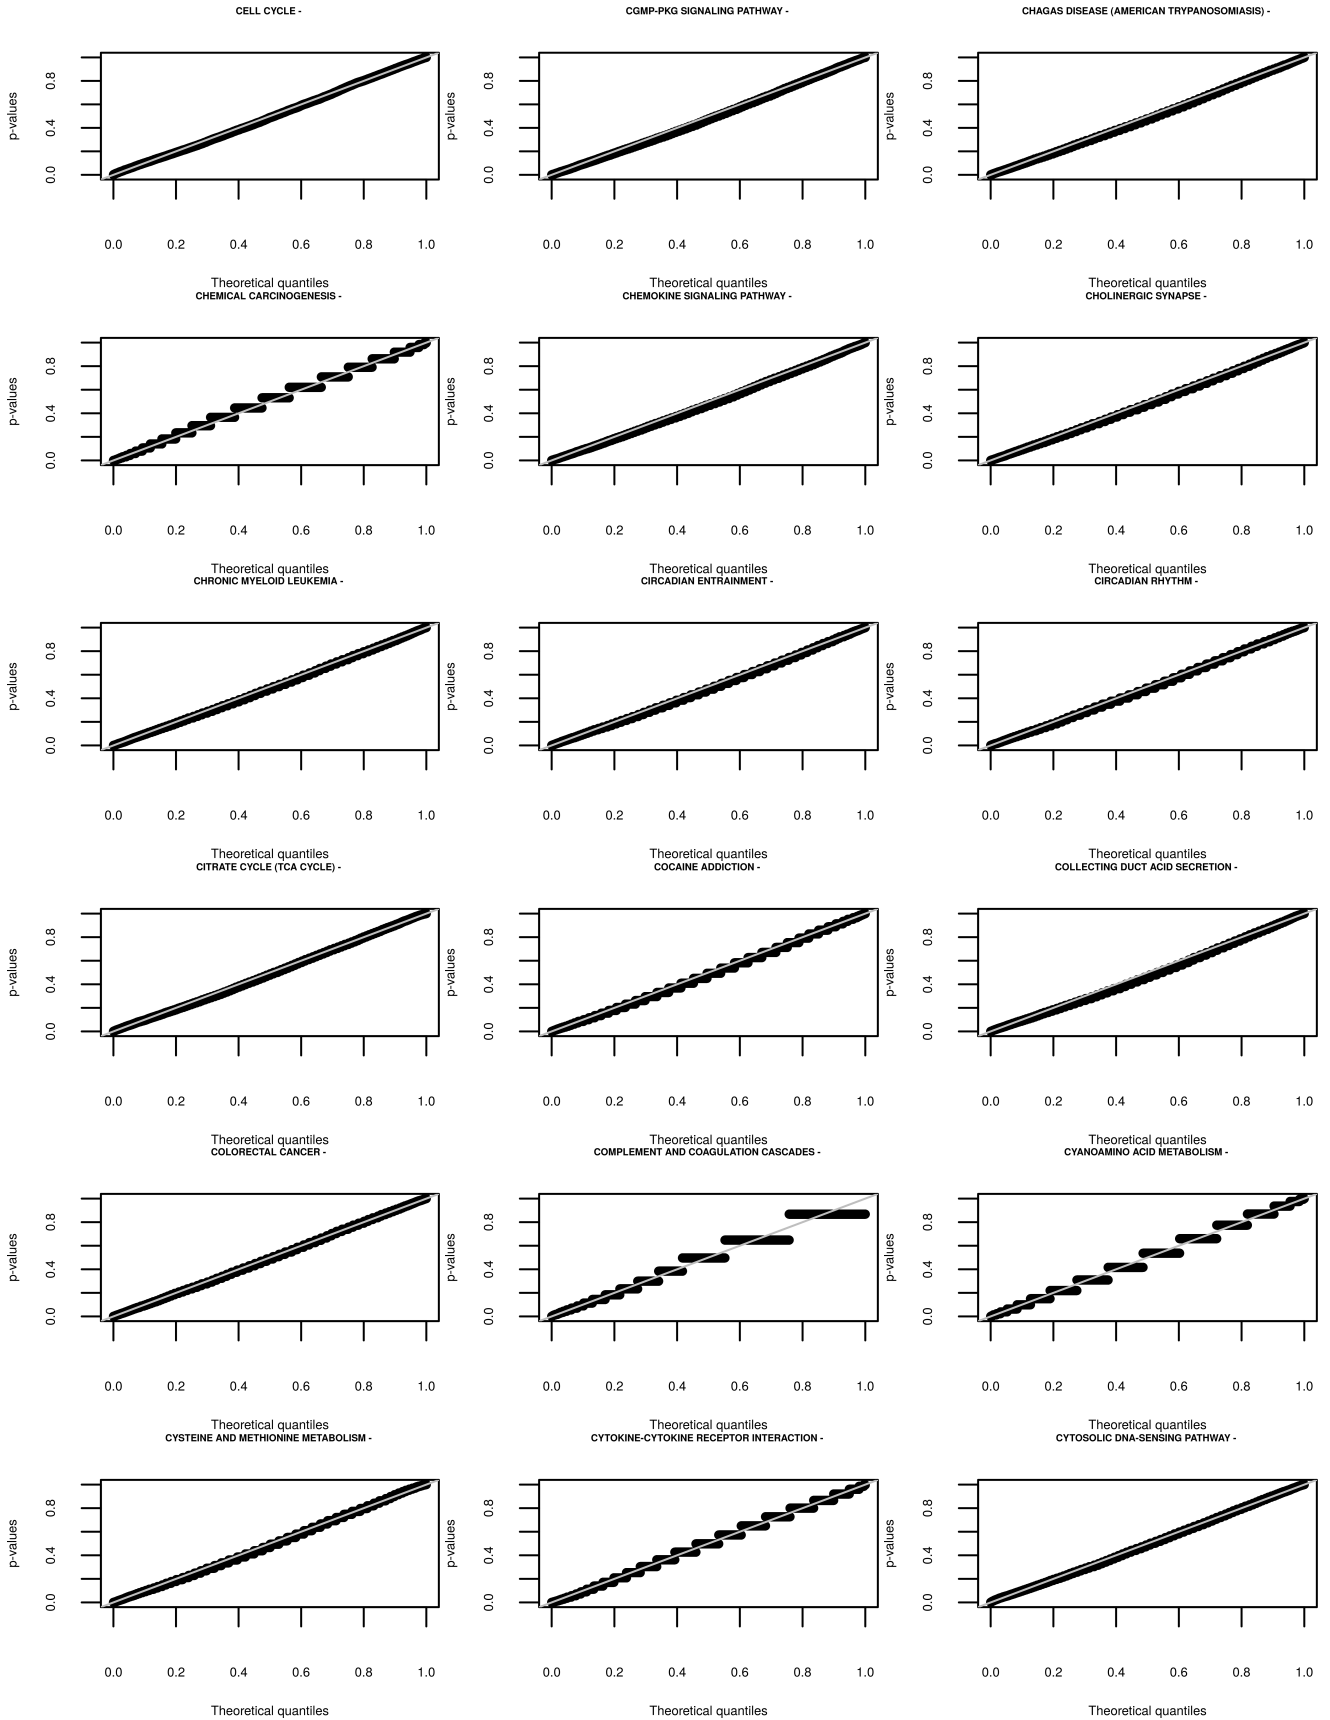

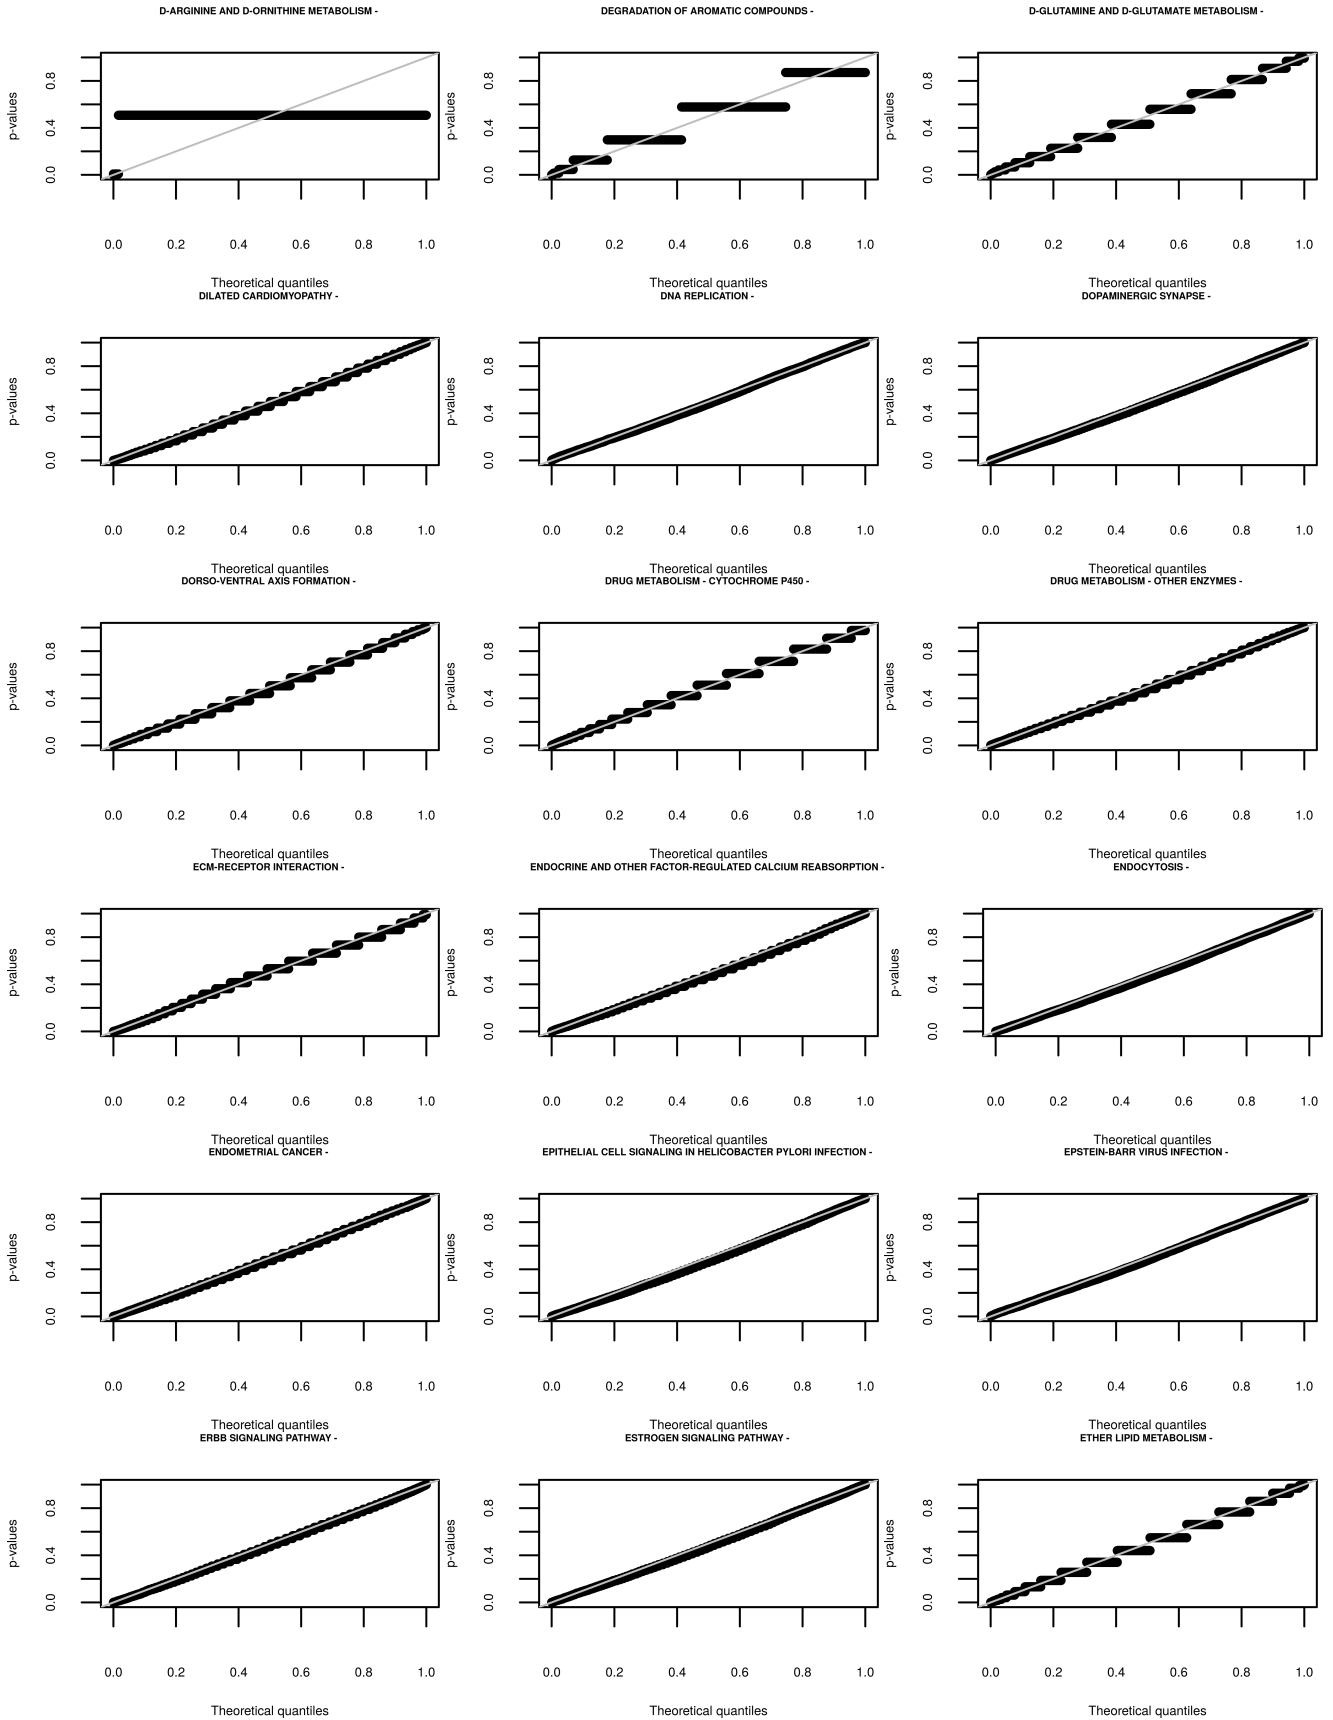

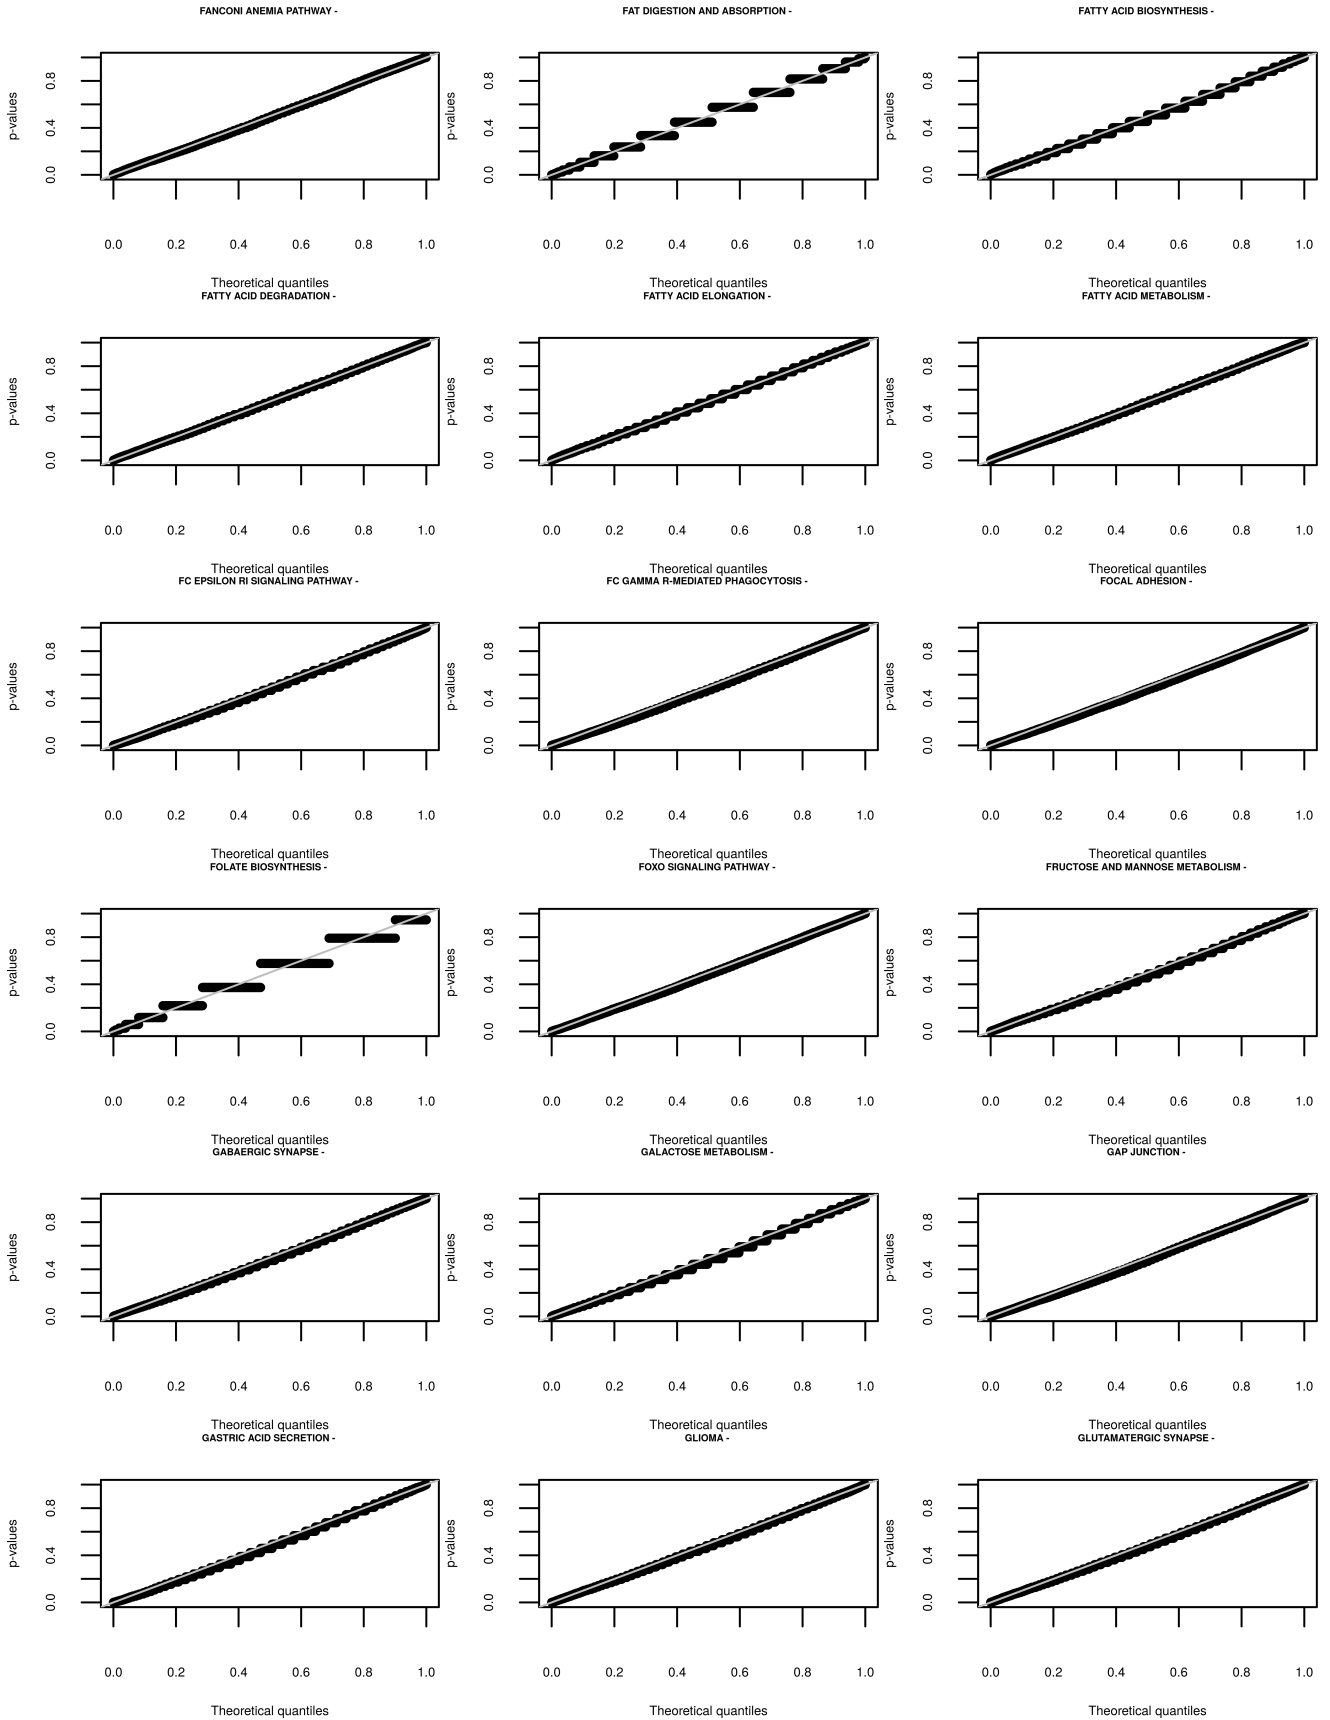

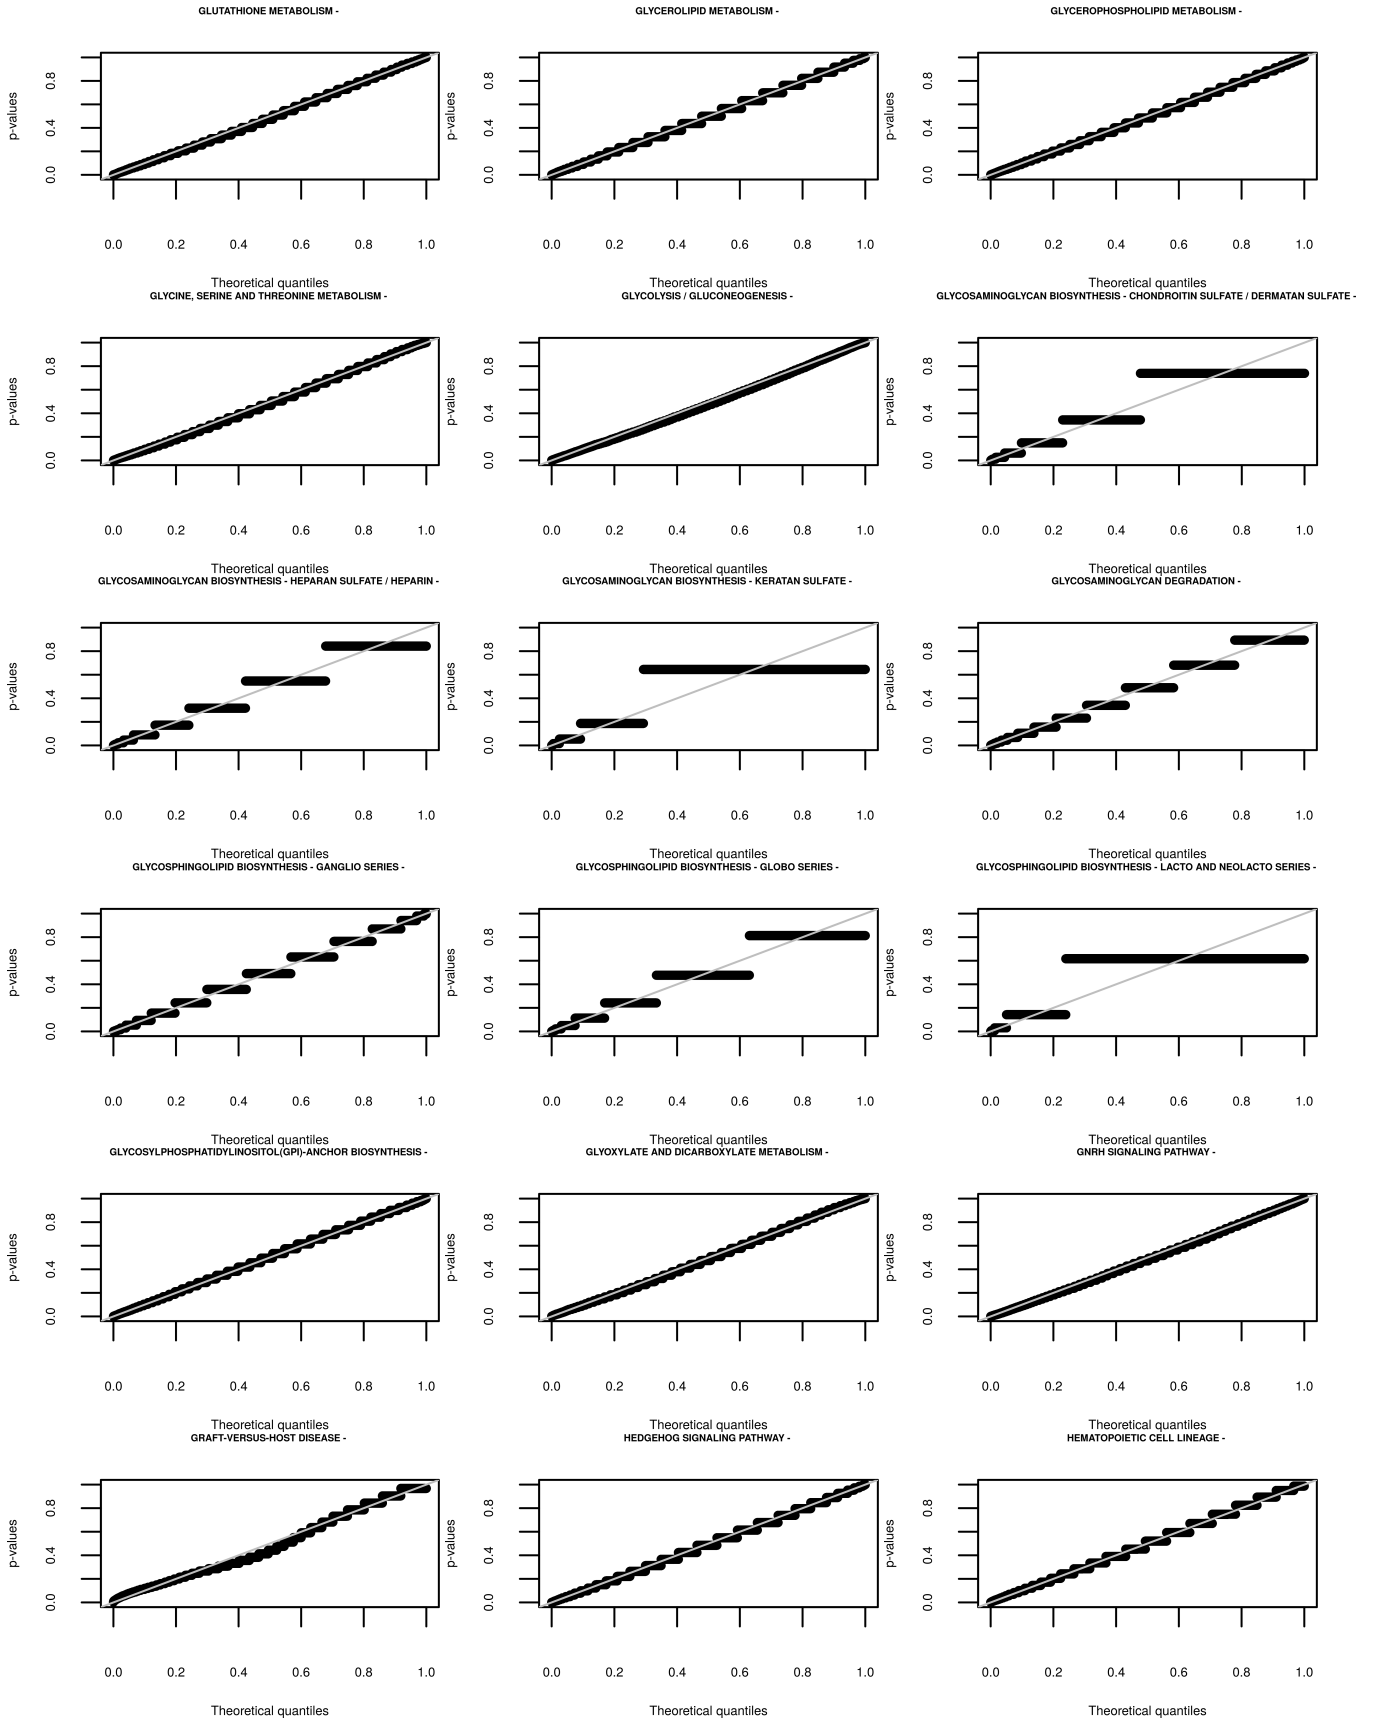

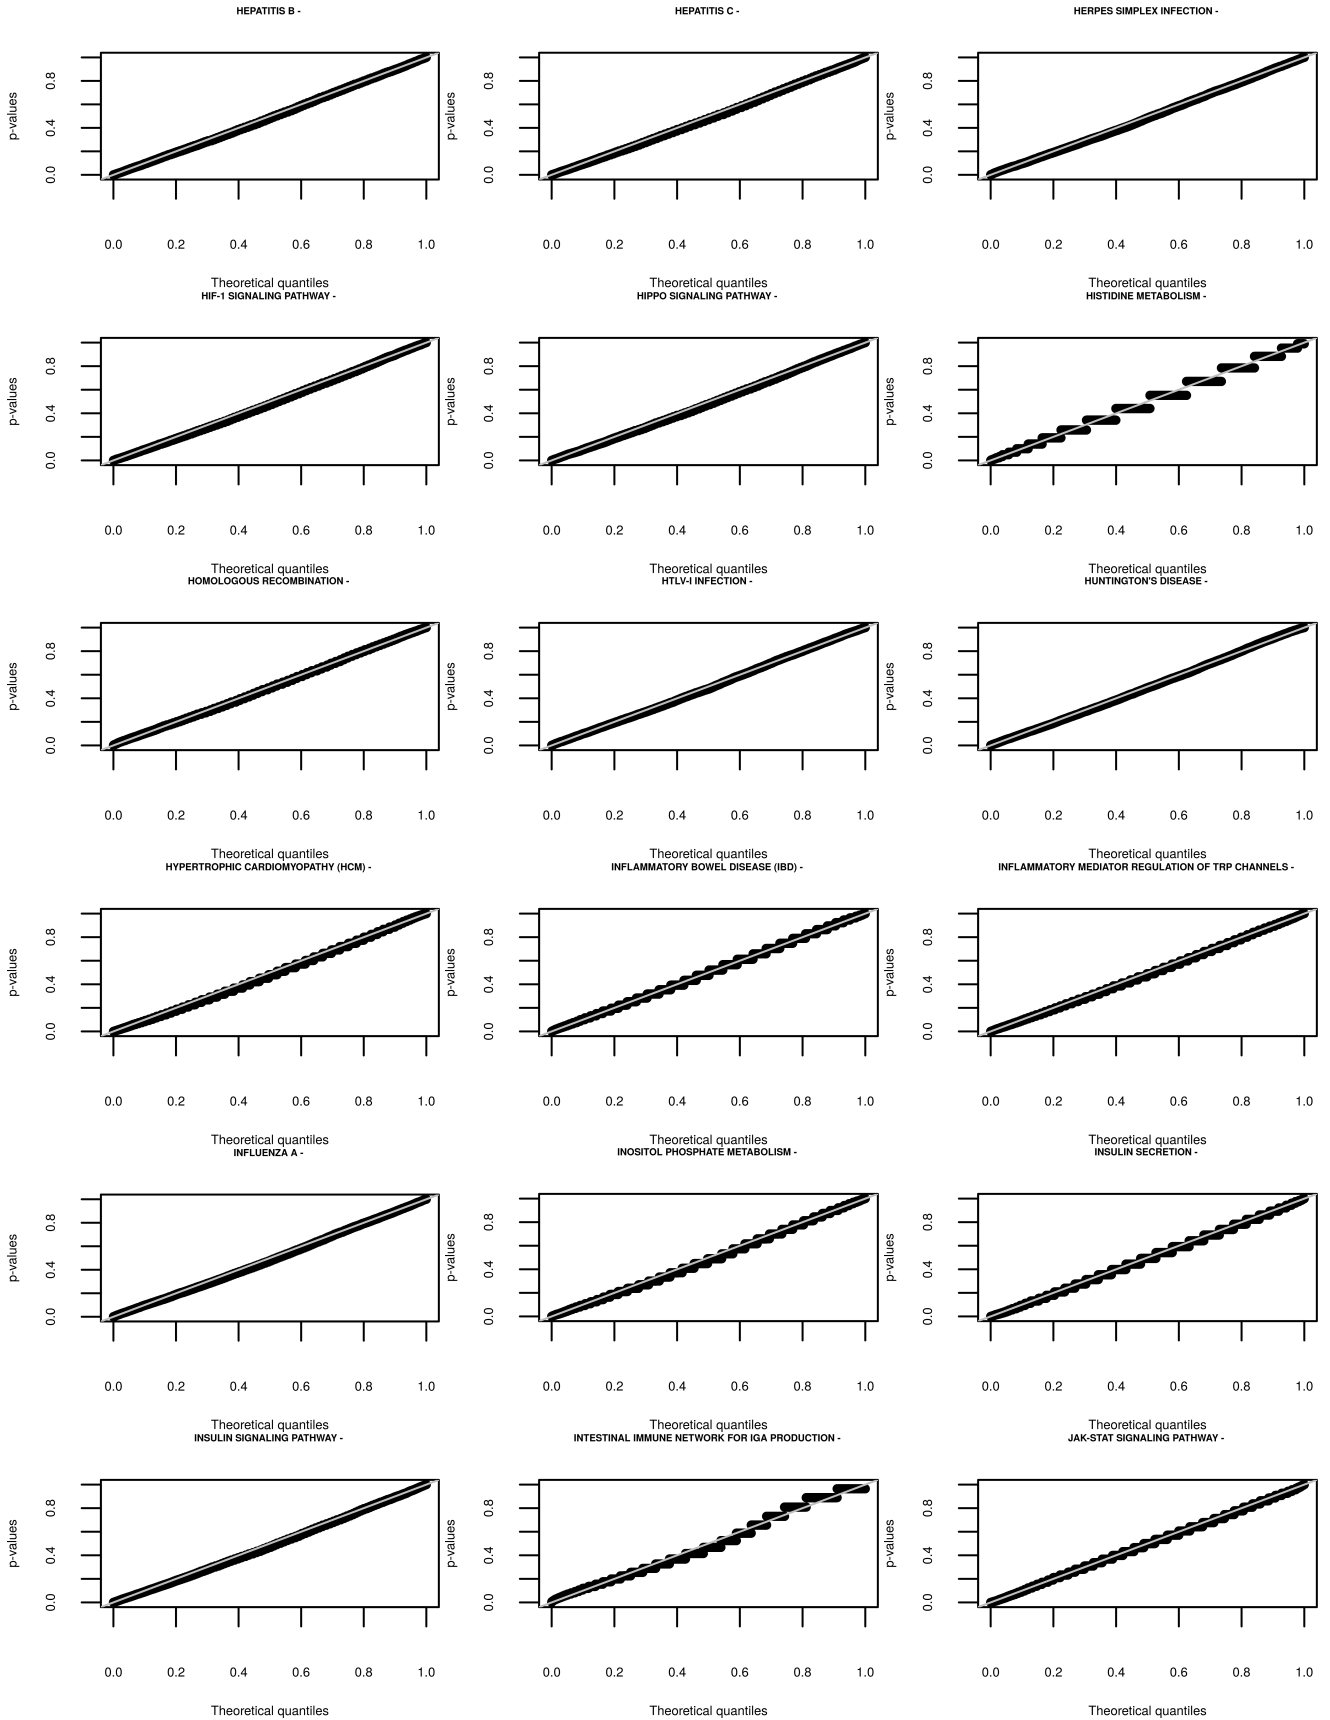



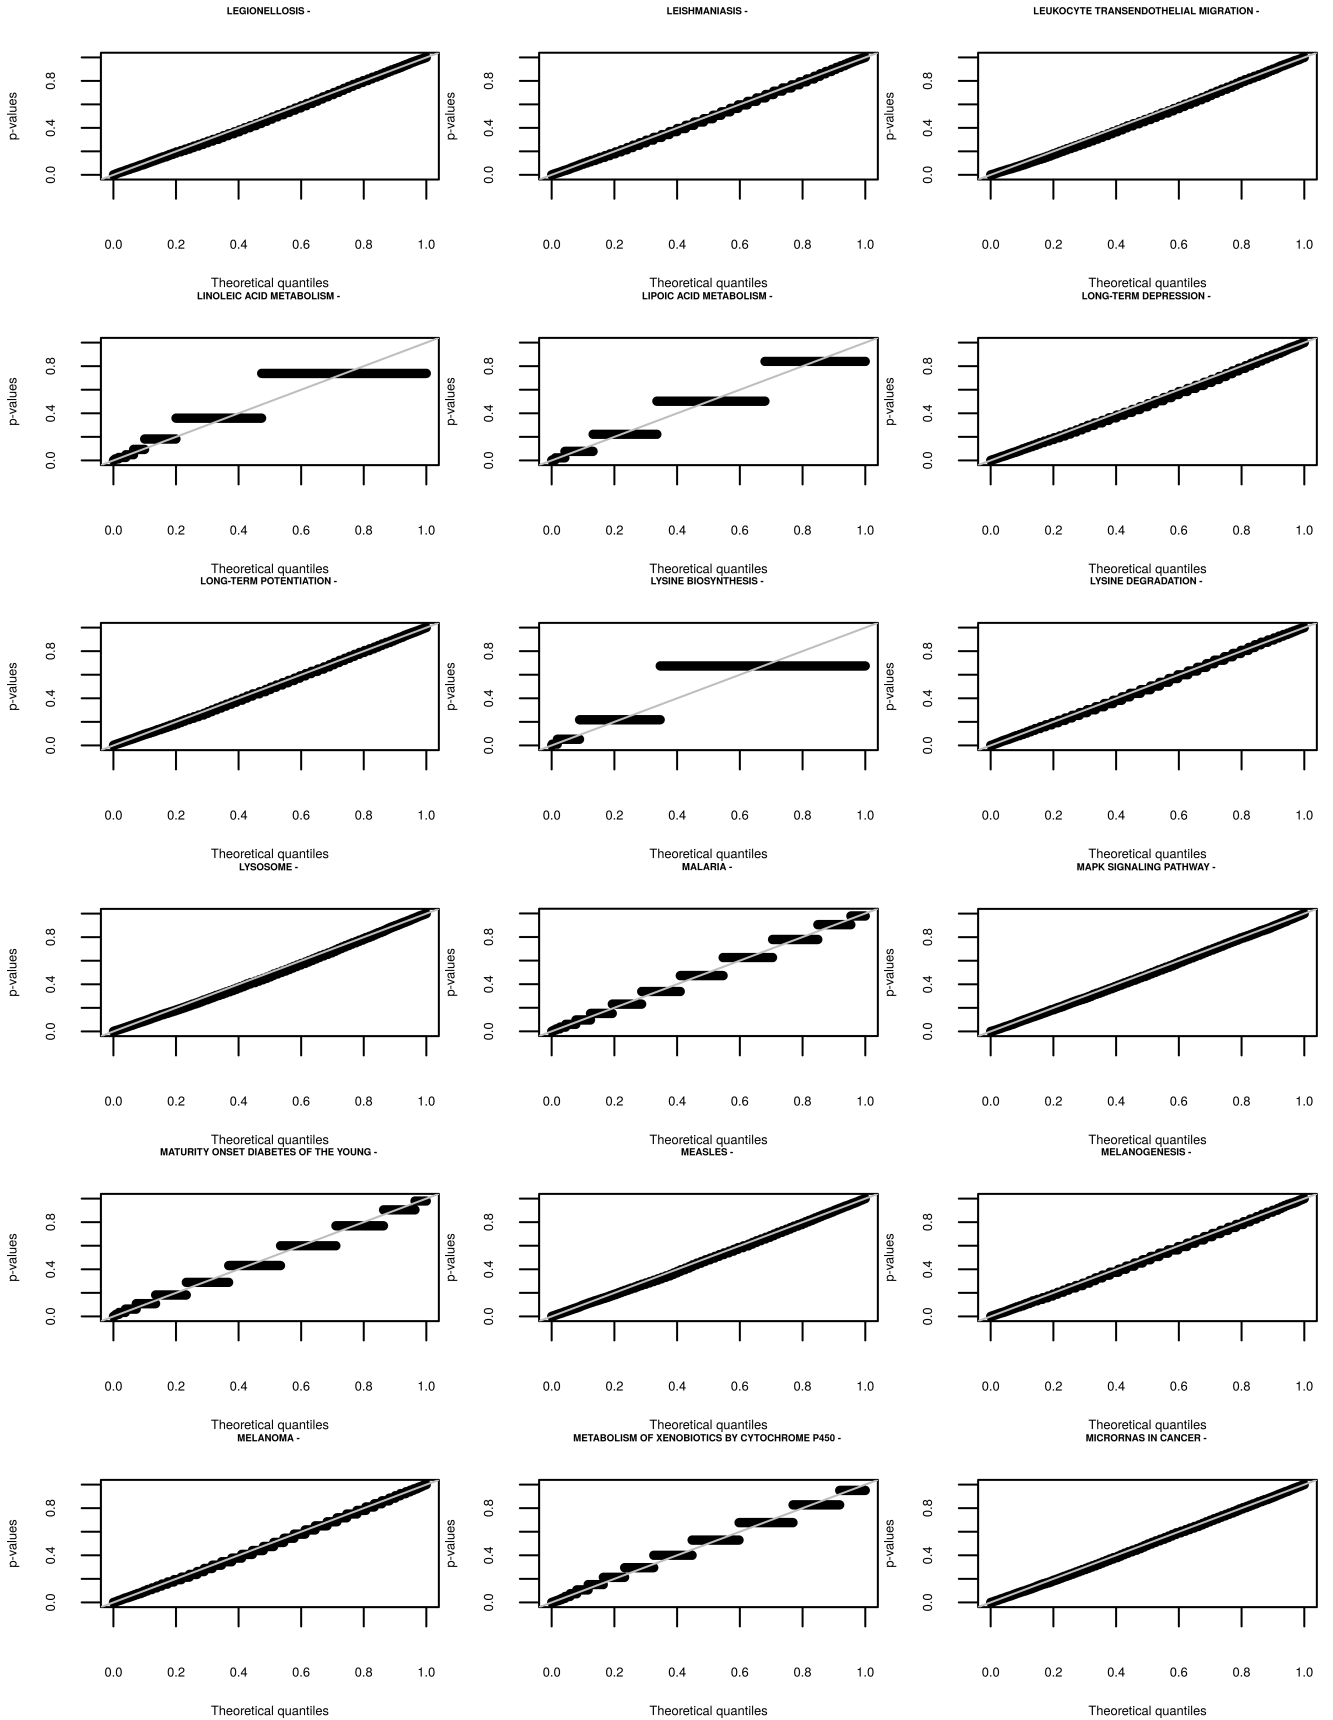

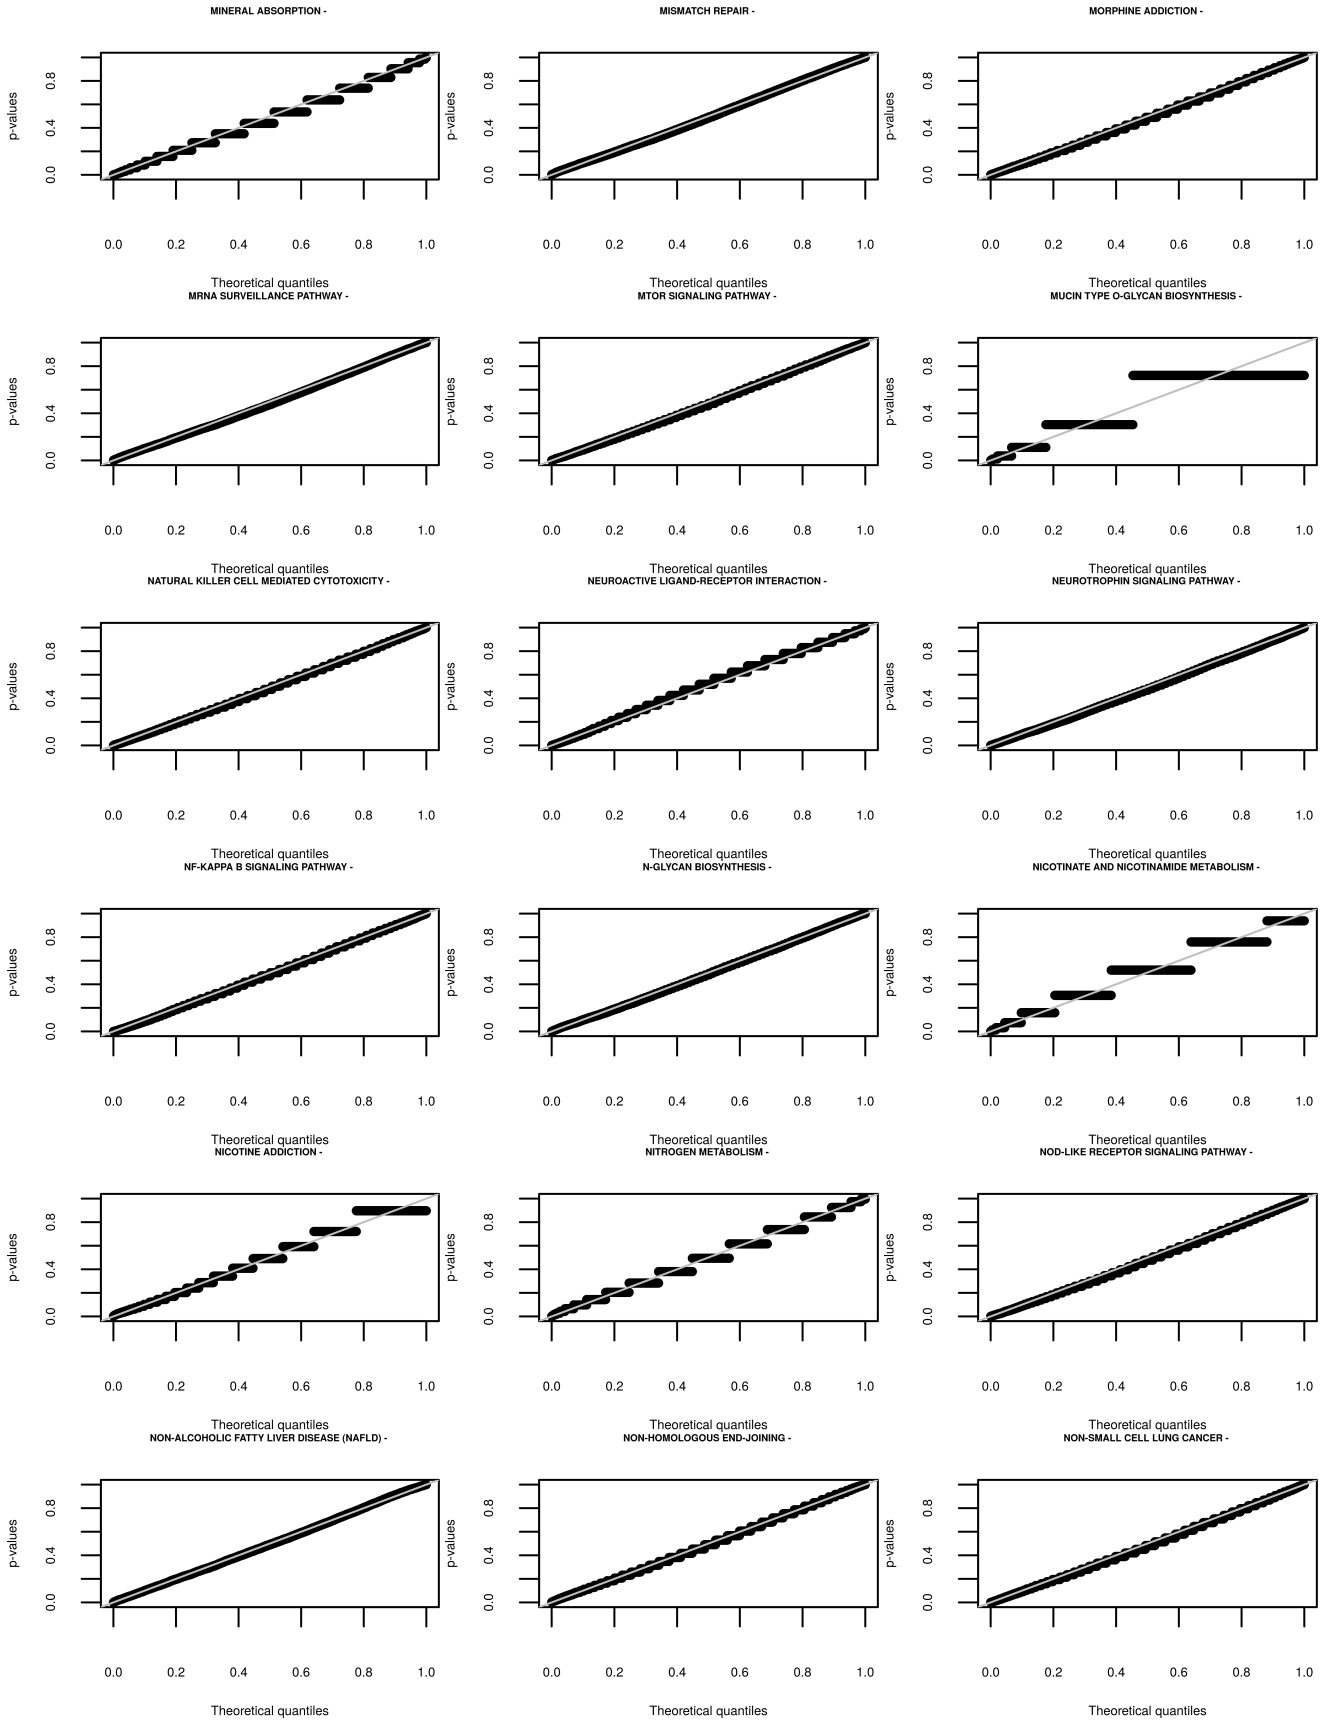

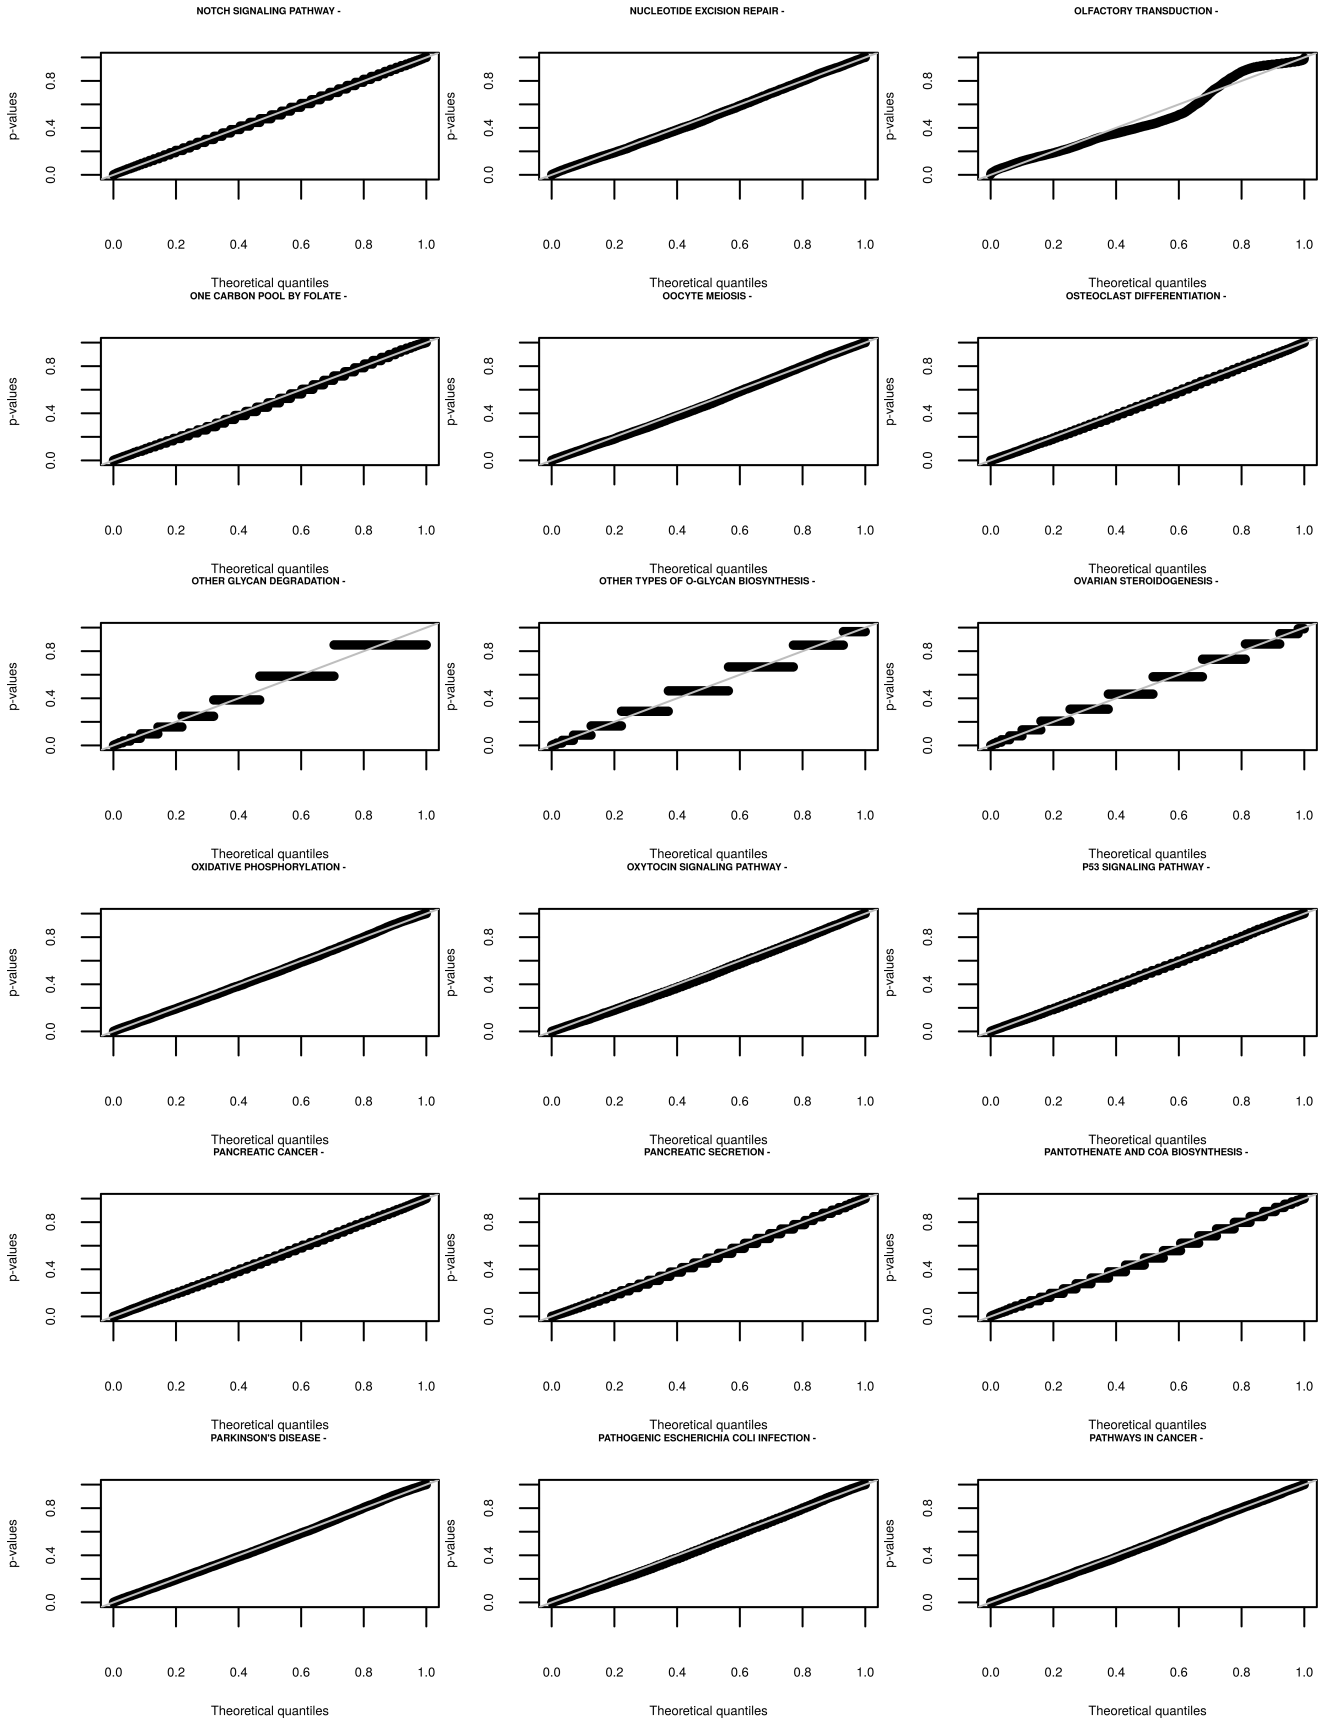

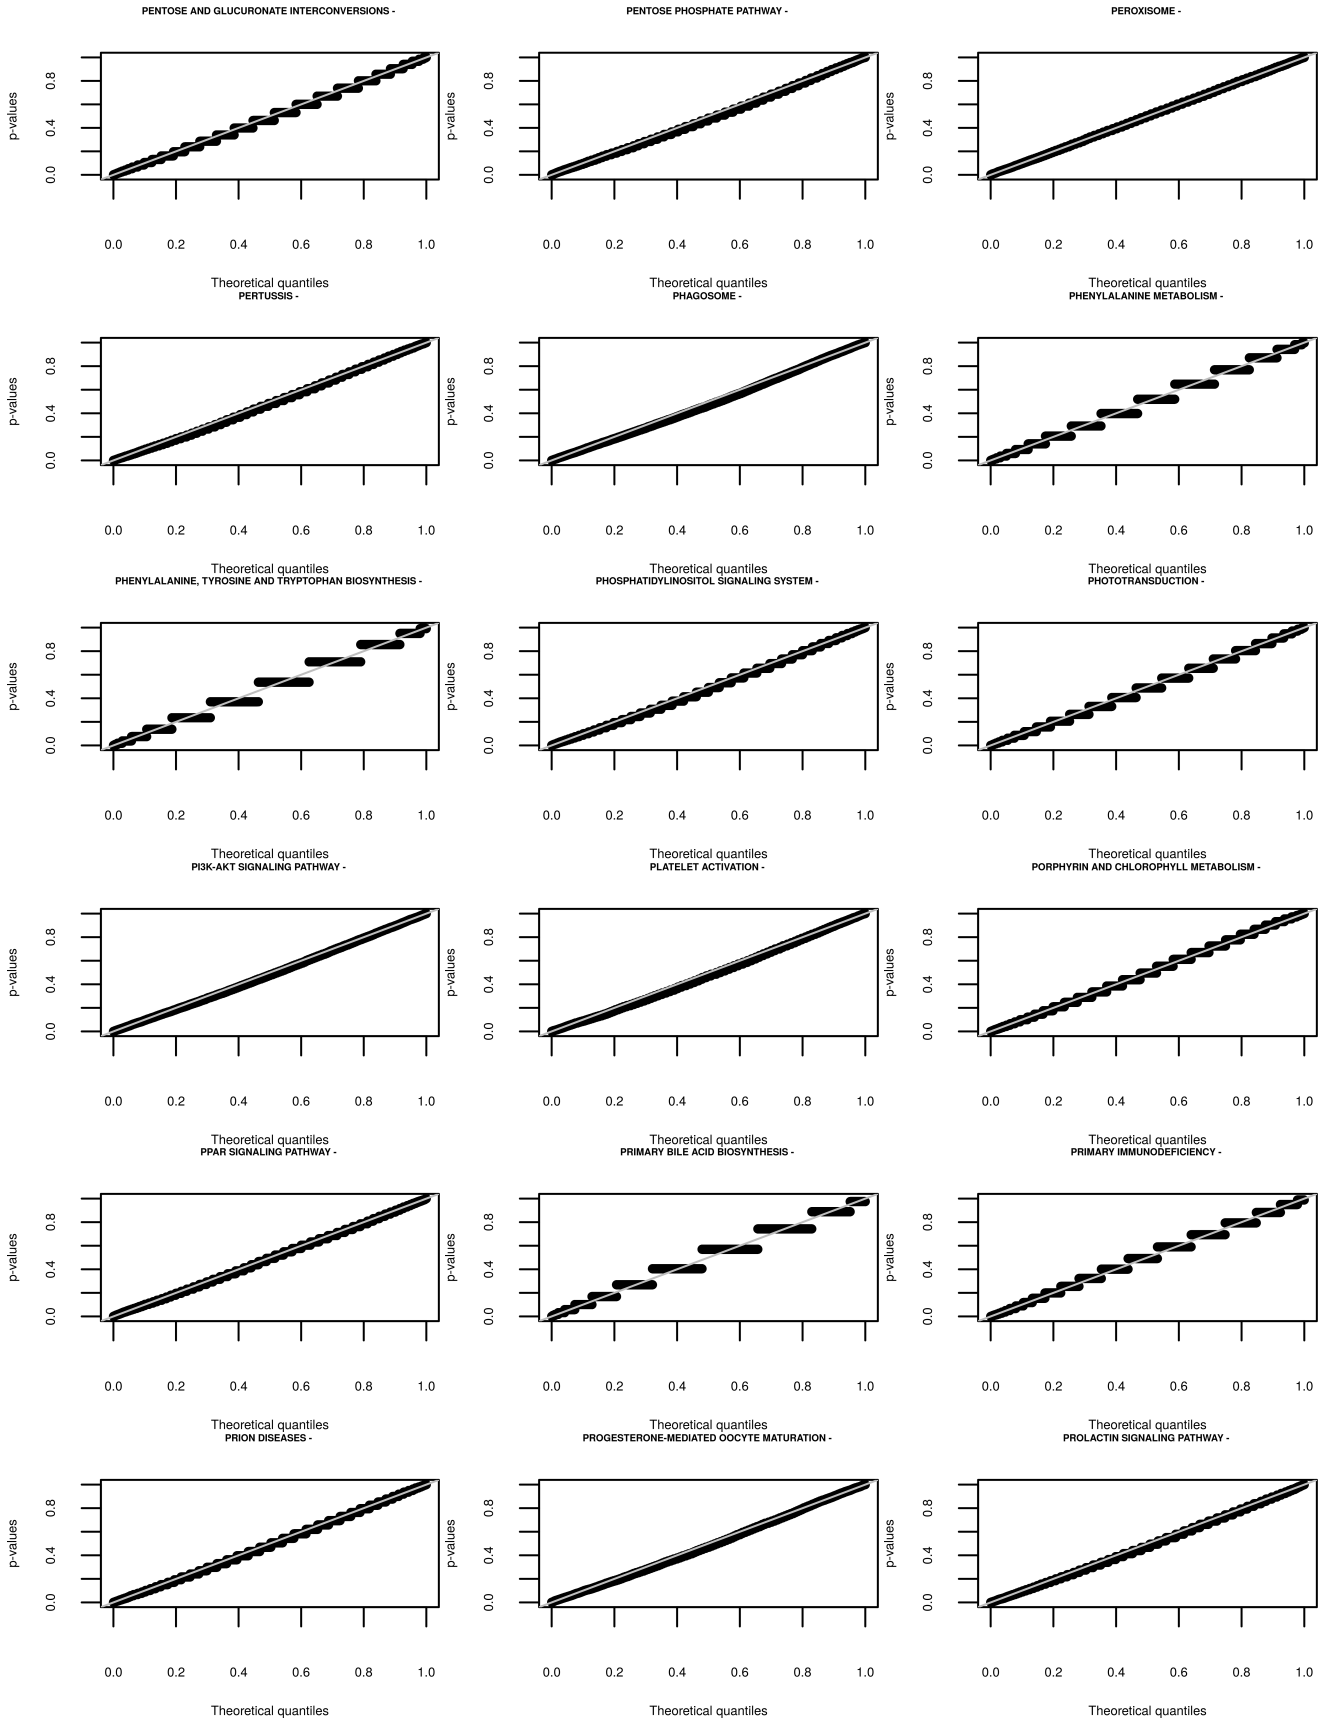

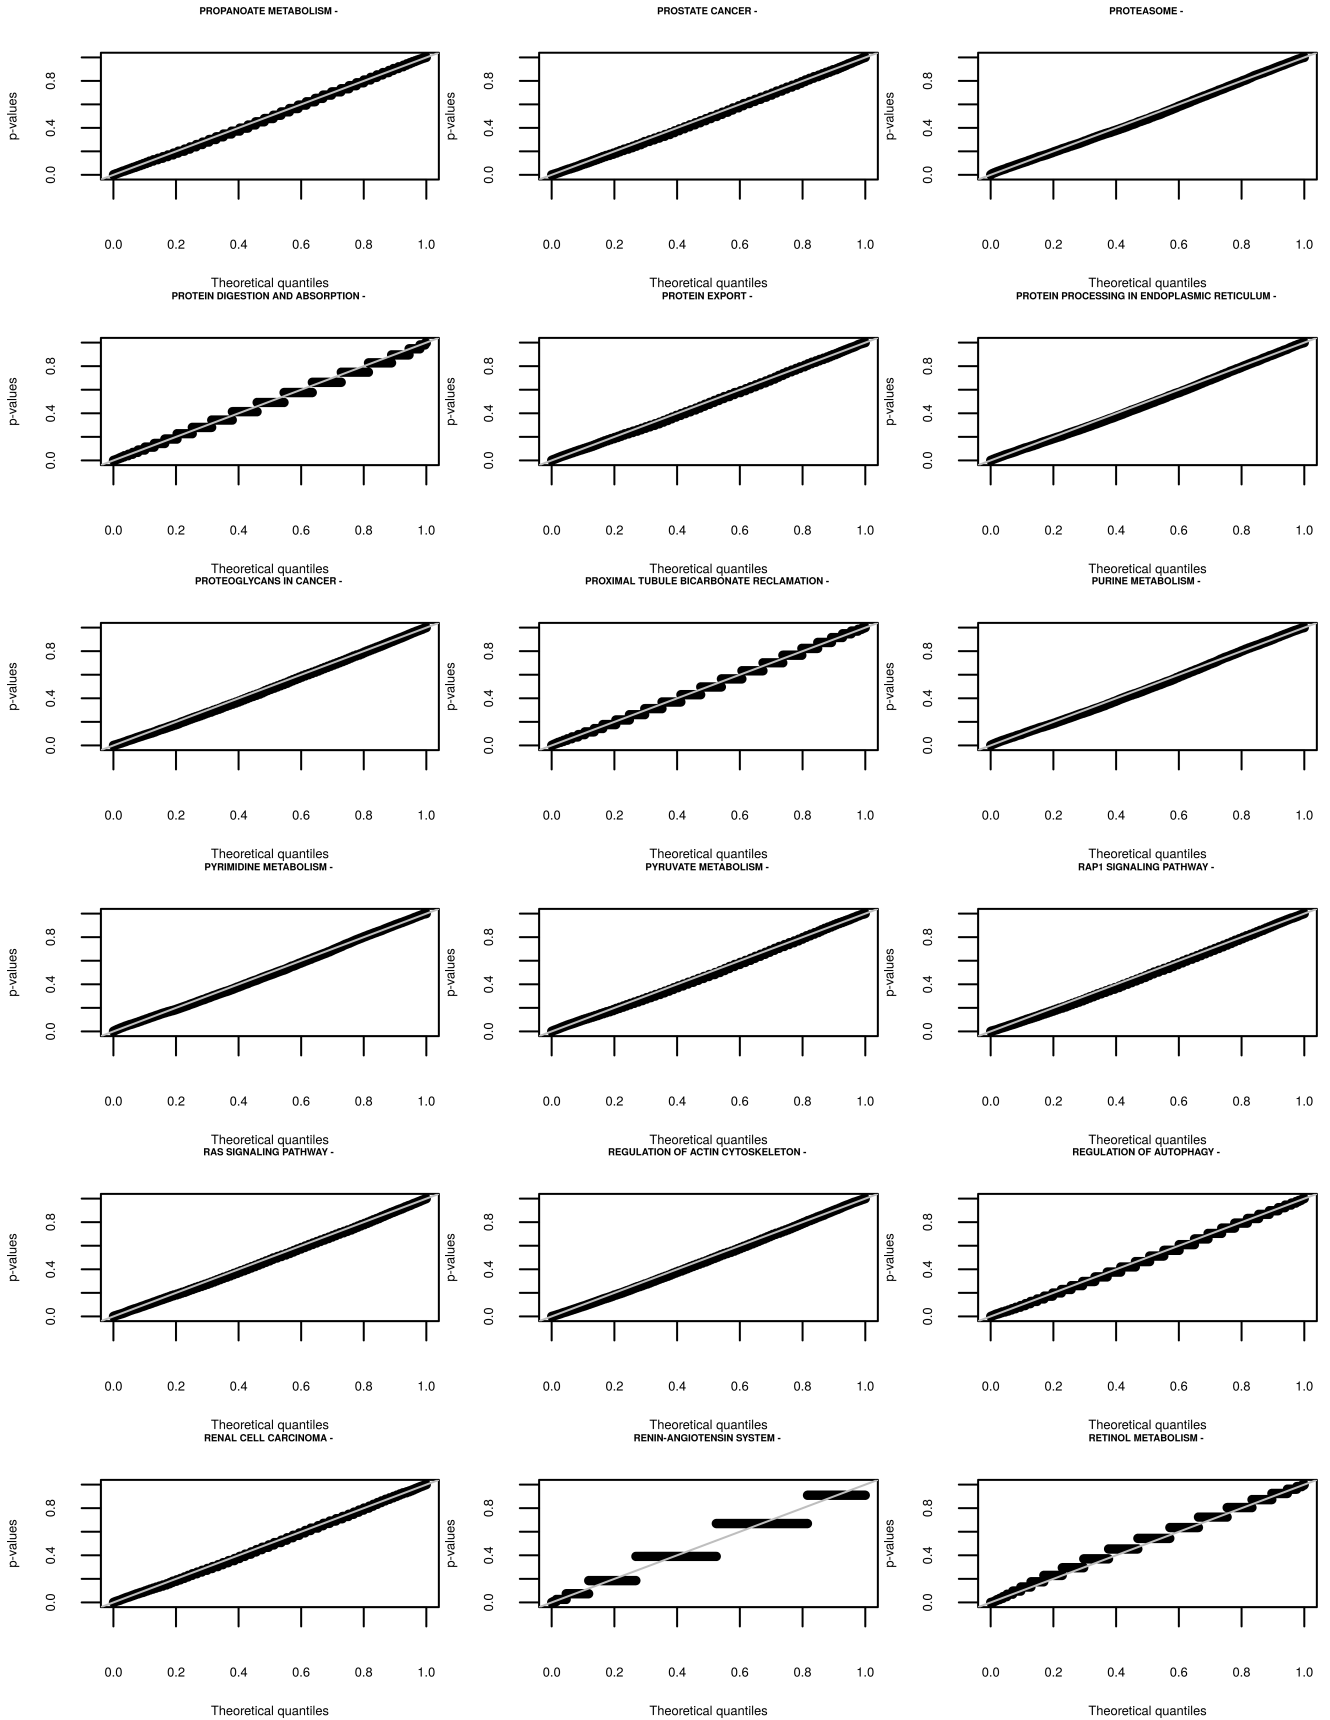

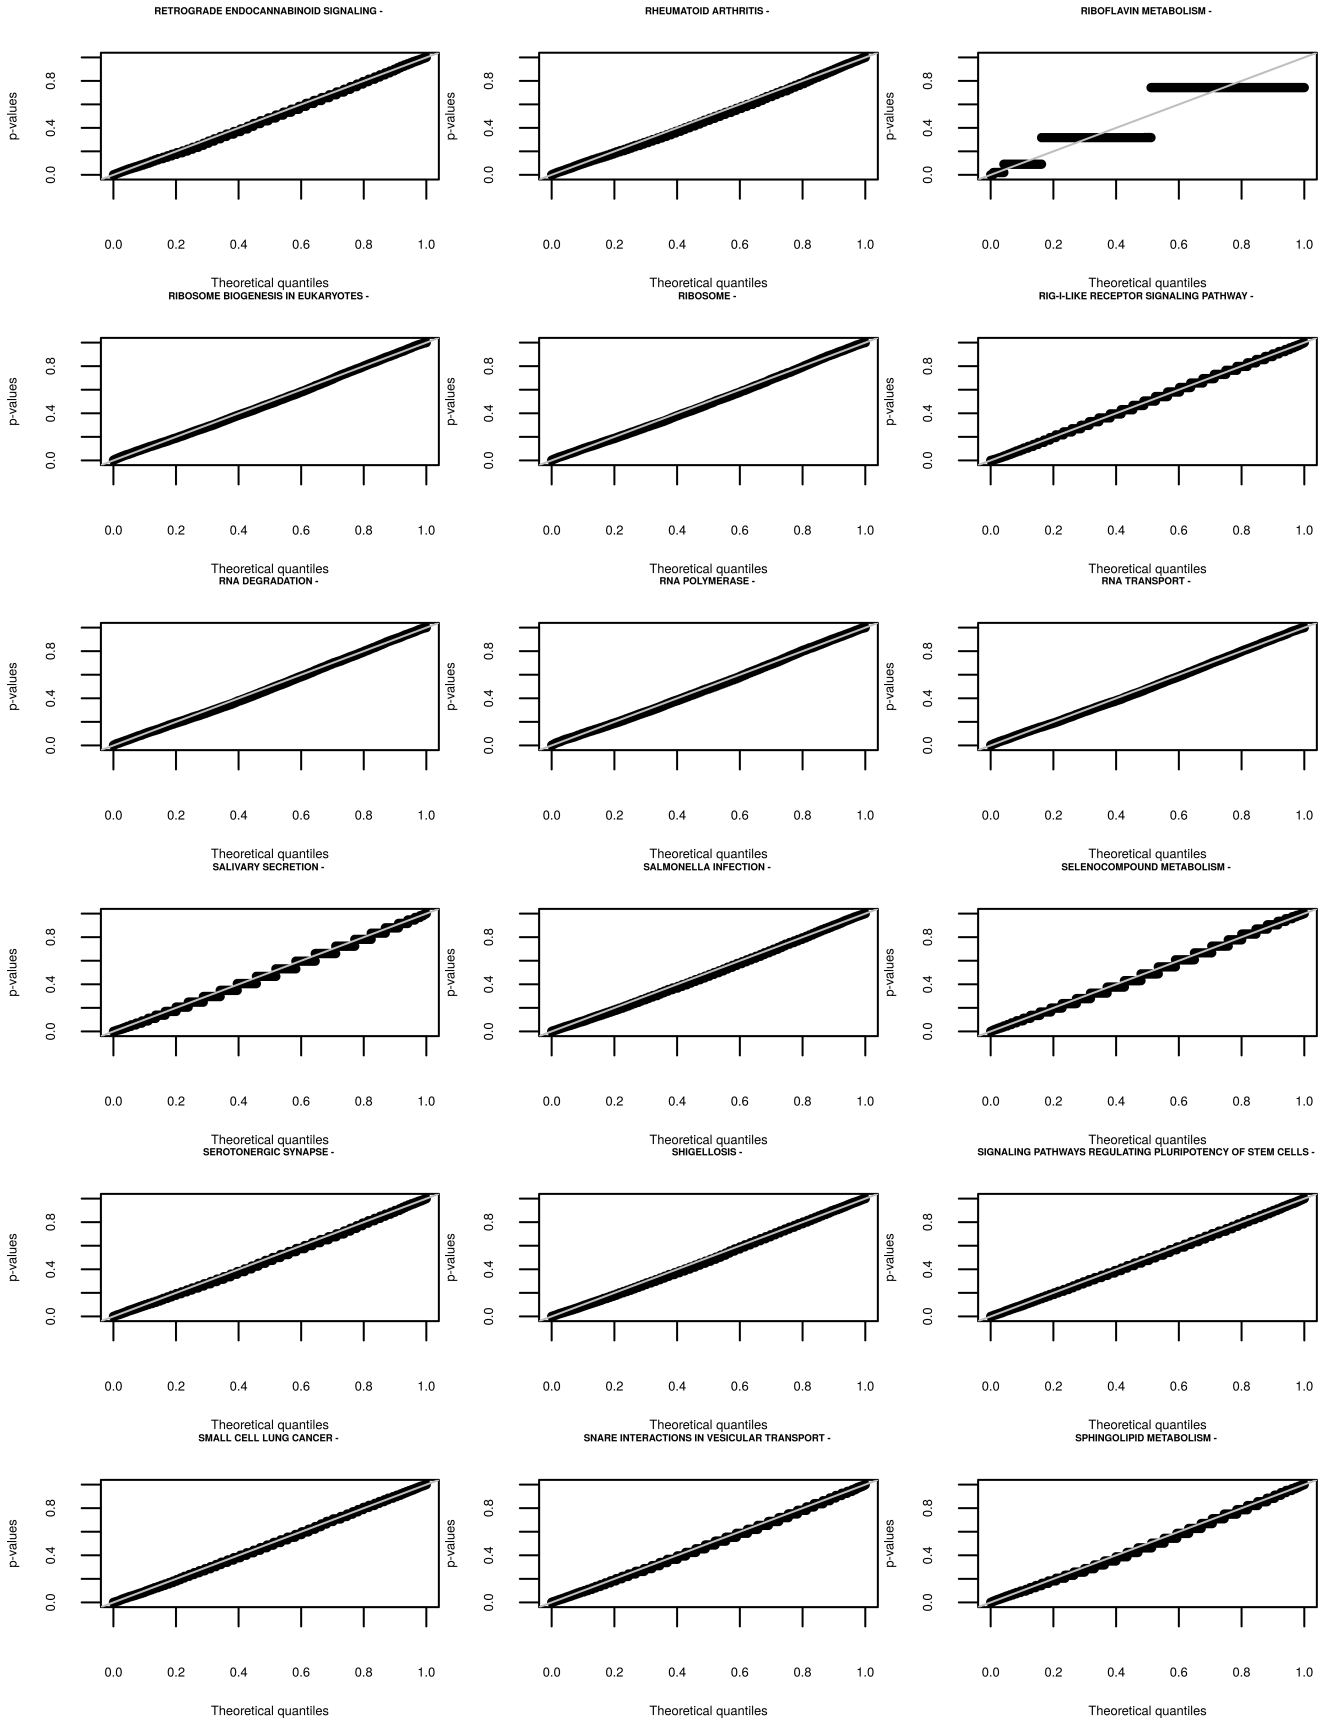

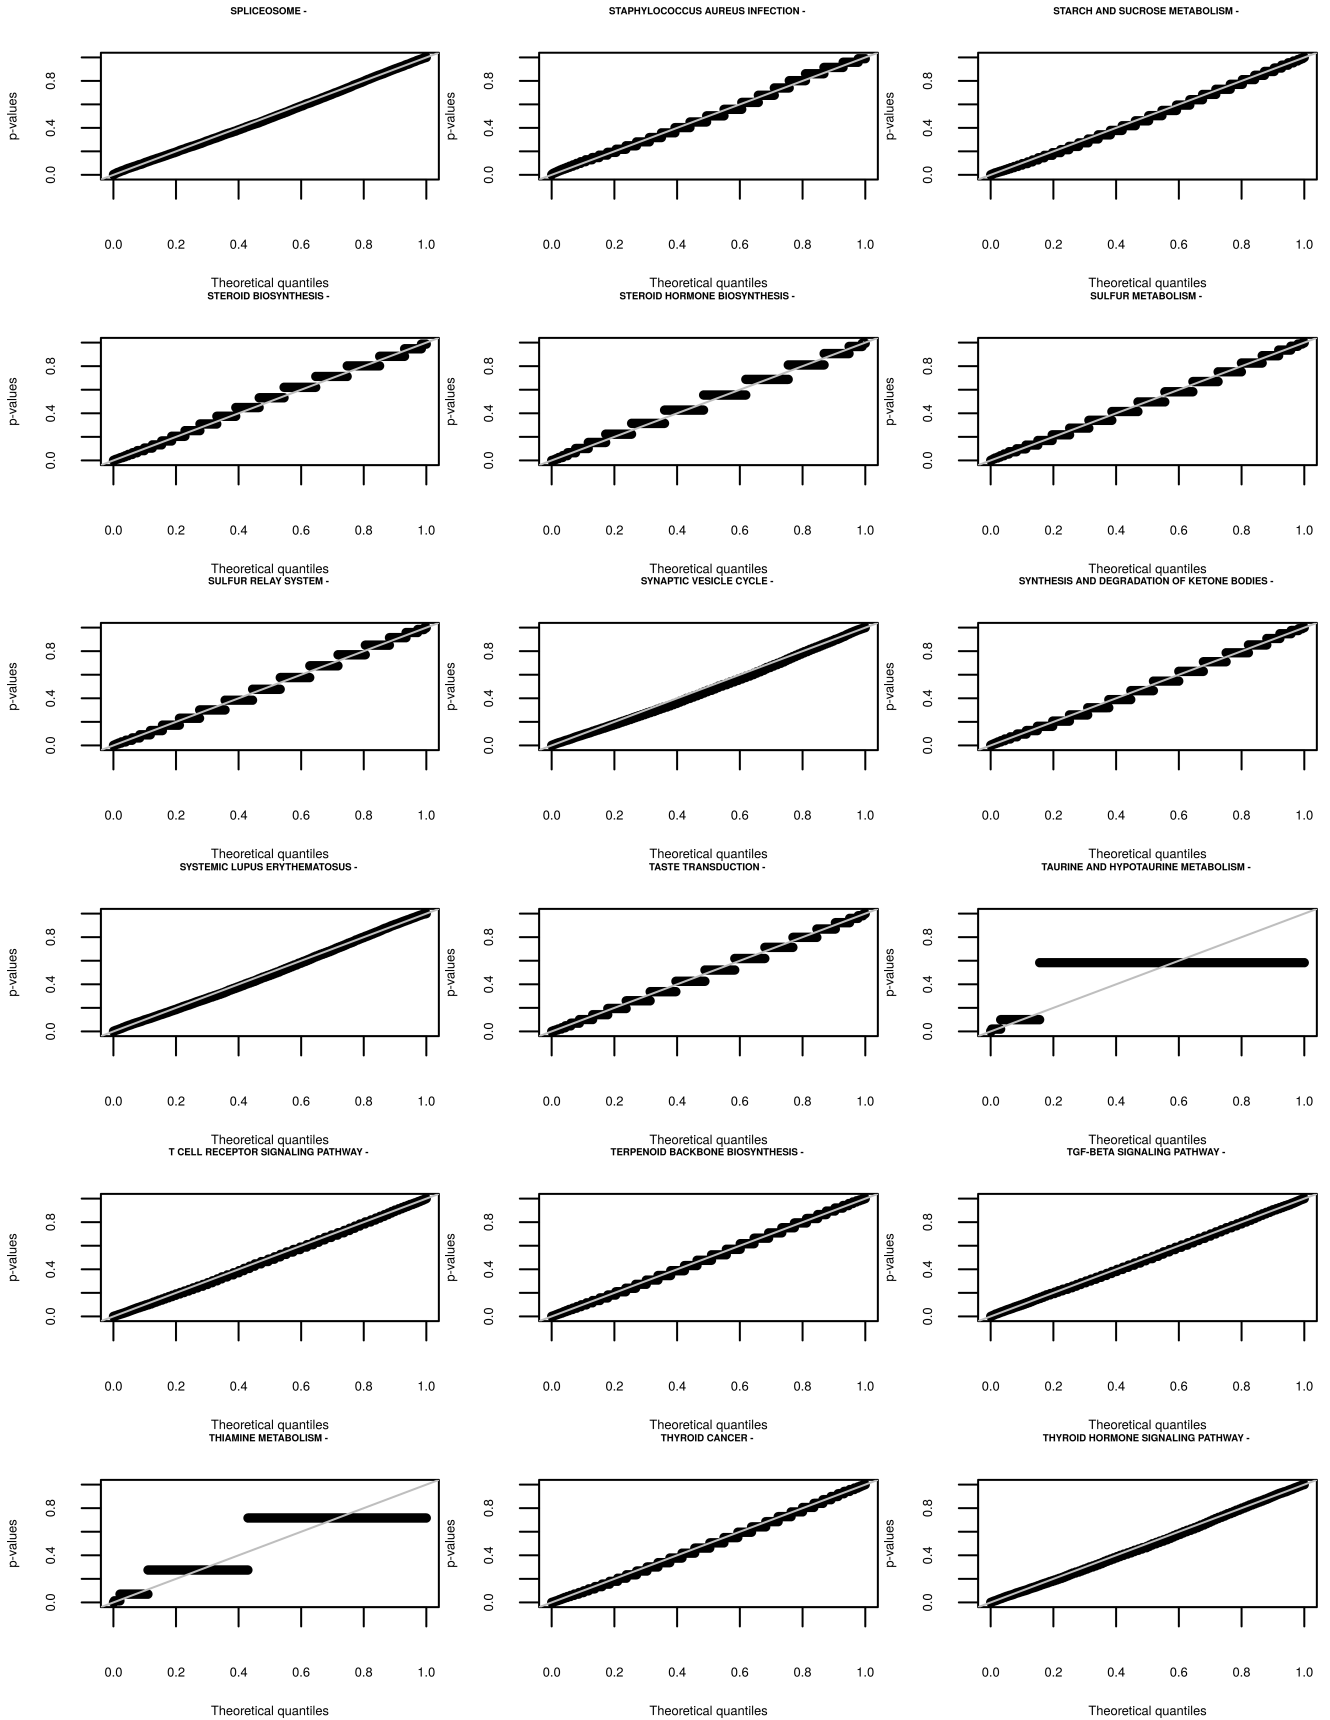

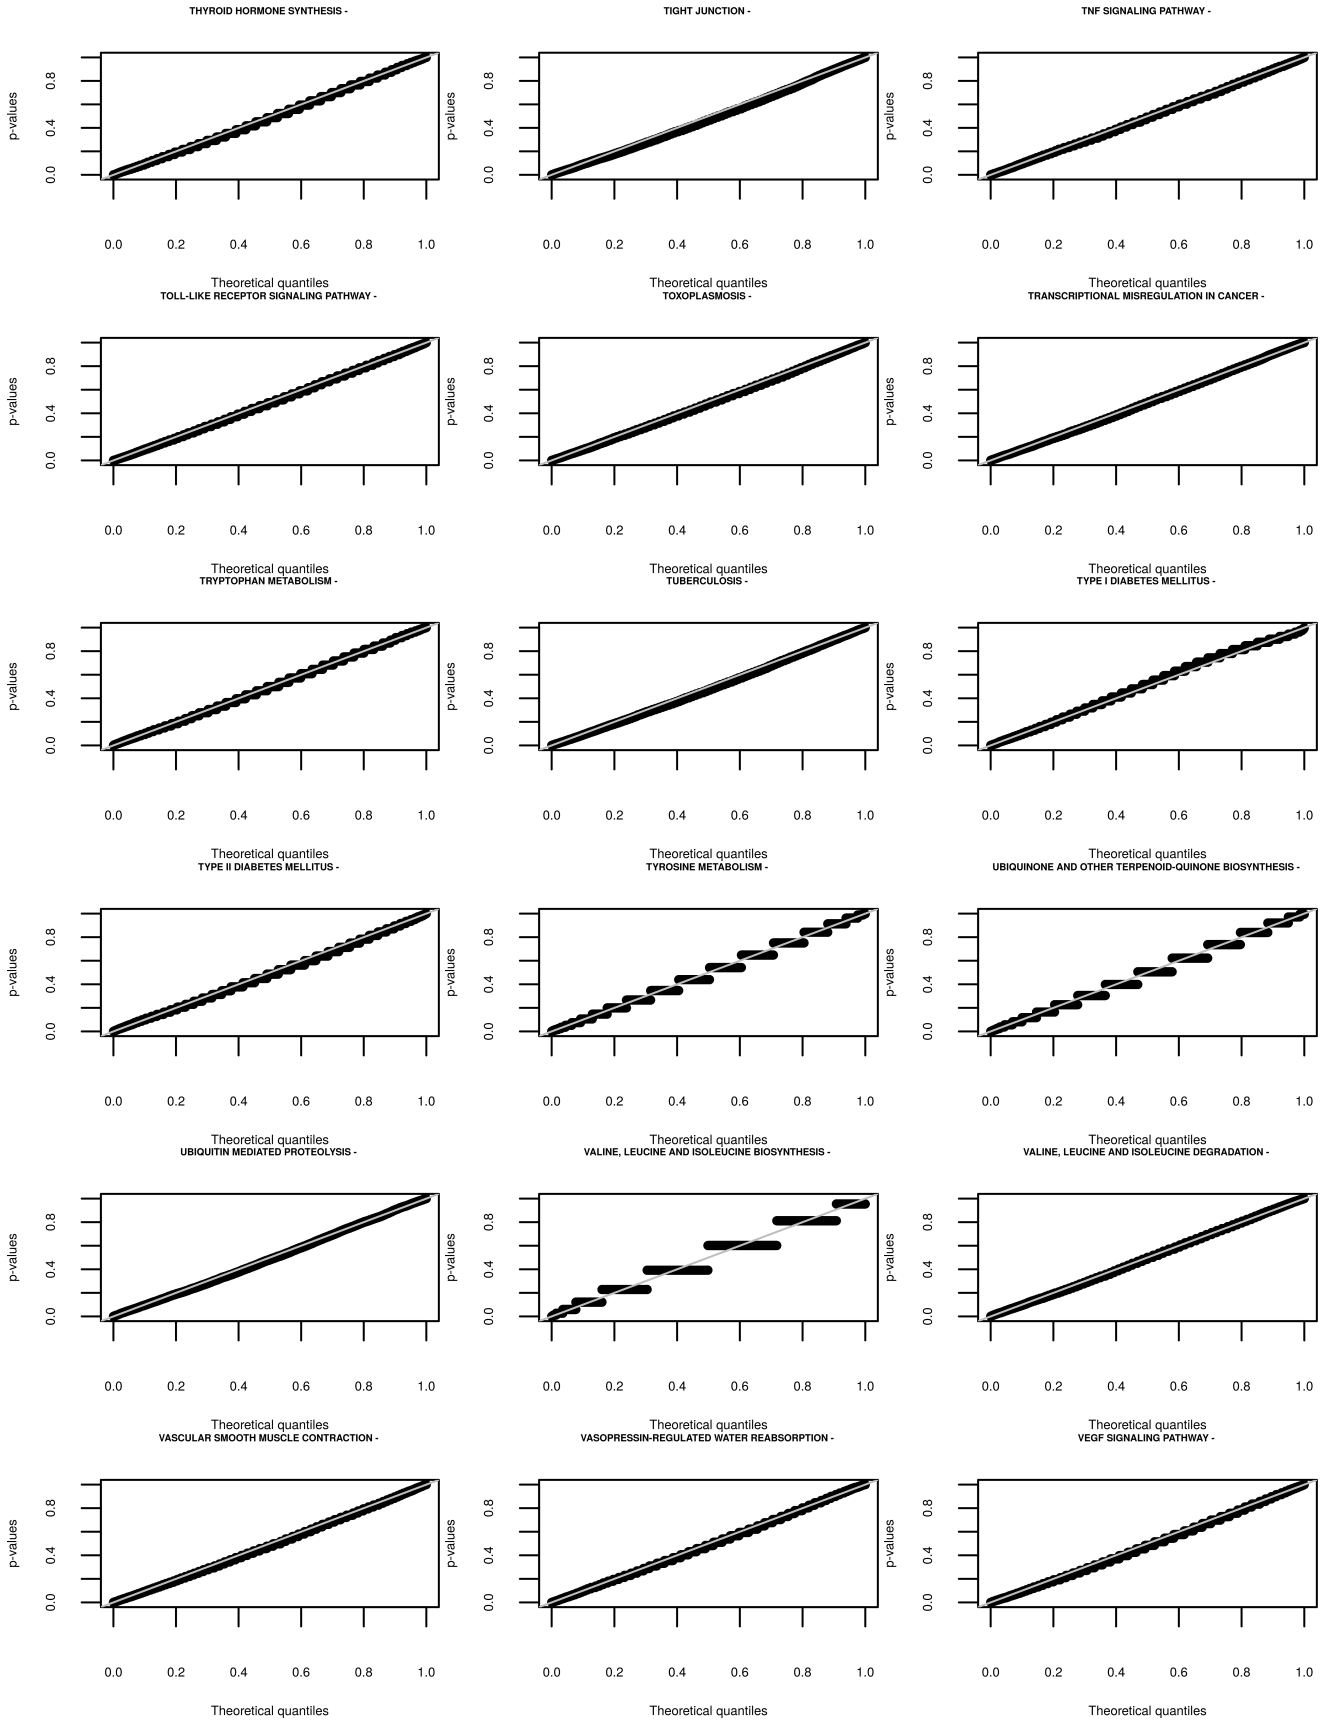



VIBRIO CHOLERAEE INFECTION -

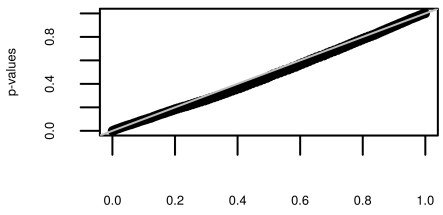

VIRAL CARCINOGENESIS -

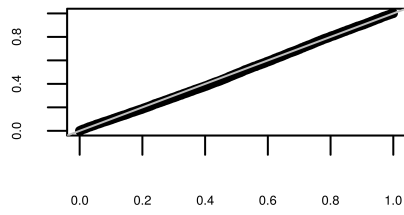

VIRAL MYOCARDITIS -

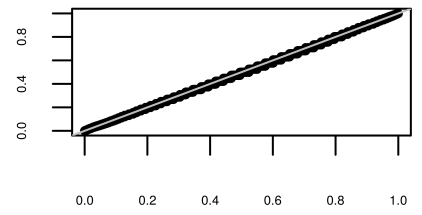

Theoretical quantiles  
VITAMIN B6 METABOLISM -

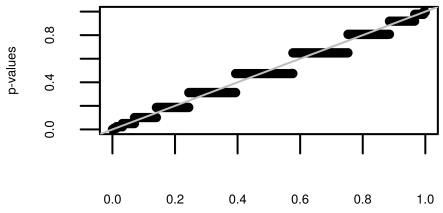

Theoretical quantiles  
VITAMIN DIGESTION AND ABSORPTION -

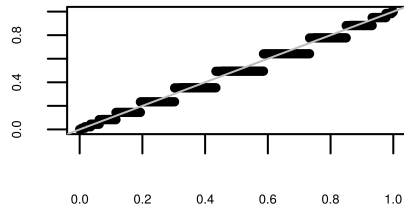

Theoretical quantiles  
WNT SIGNALING PATHWAY -

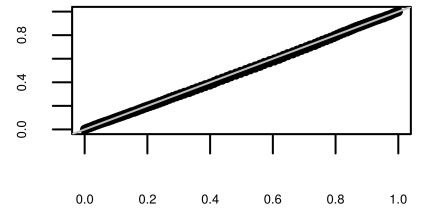

# Pathway-specific model estimation for improved pathway annotation by network crosstalk

*Miguel Castresana-Aguirre, Erik L.L. Sonnhammer\**

Department of Biochemistry and Biophysics, Stockholm University, Science for Life Laboratory, Box 1031, 17121 Solna, Sweden,

\*To whom correspondence should be addressed: erik.sonnhammer@dbb.su.se

**Supplementary Figure 2:** 10000 random gene sets of size 50 are run against KEGG pathways. P-value uniformity test of ANUBIX. Reported p-values are plotted against theoretical quantile (rank). Software: R version 3.4.3 <https://www.r-project.org/>.

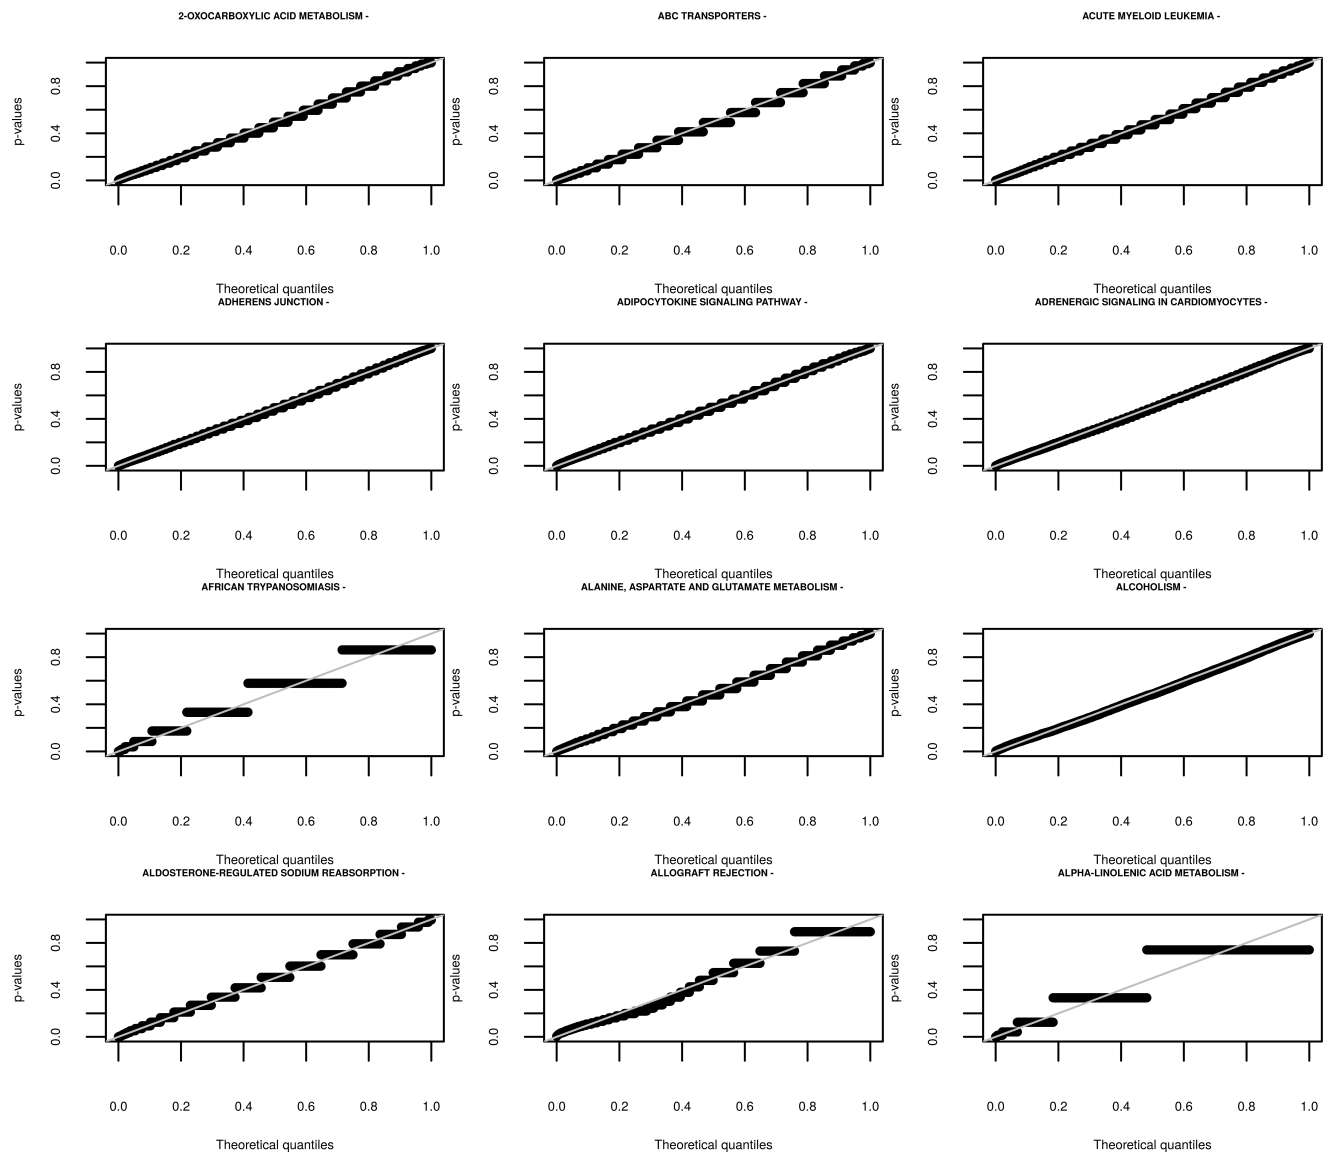

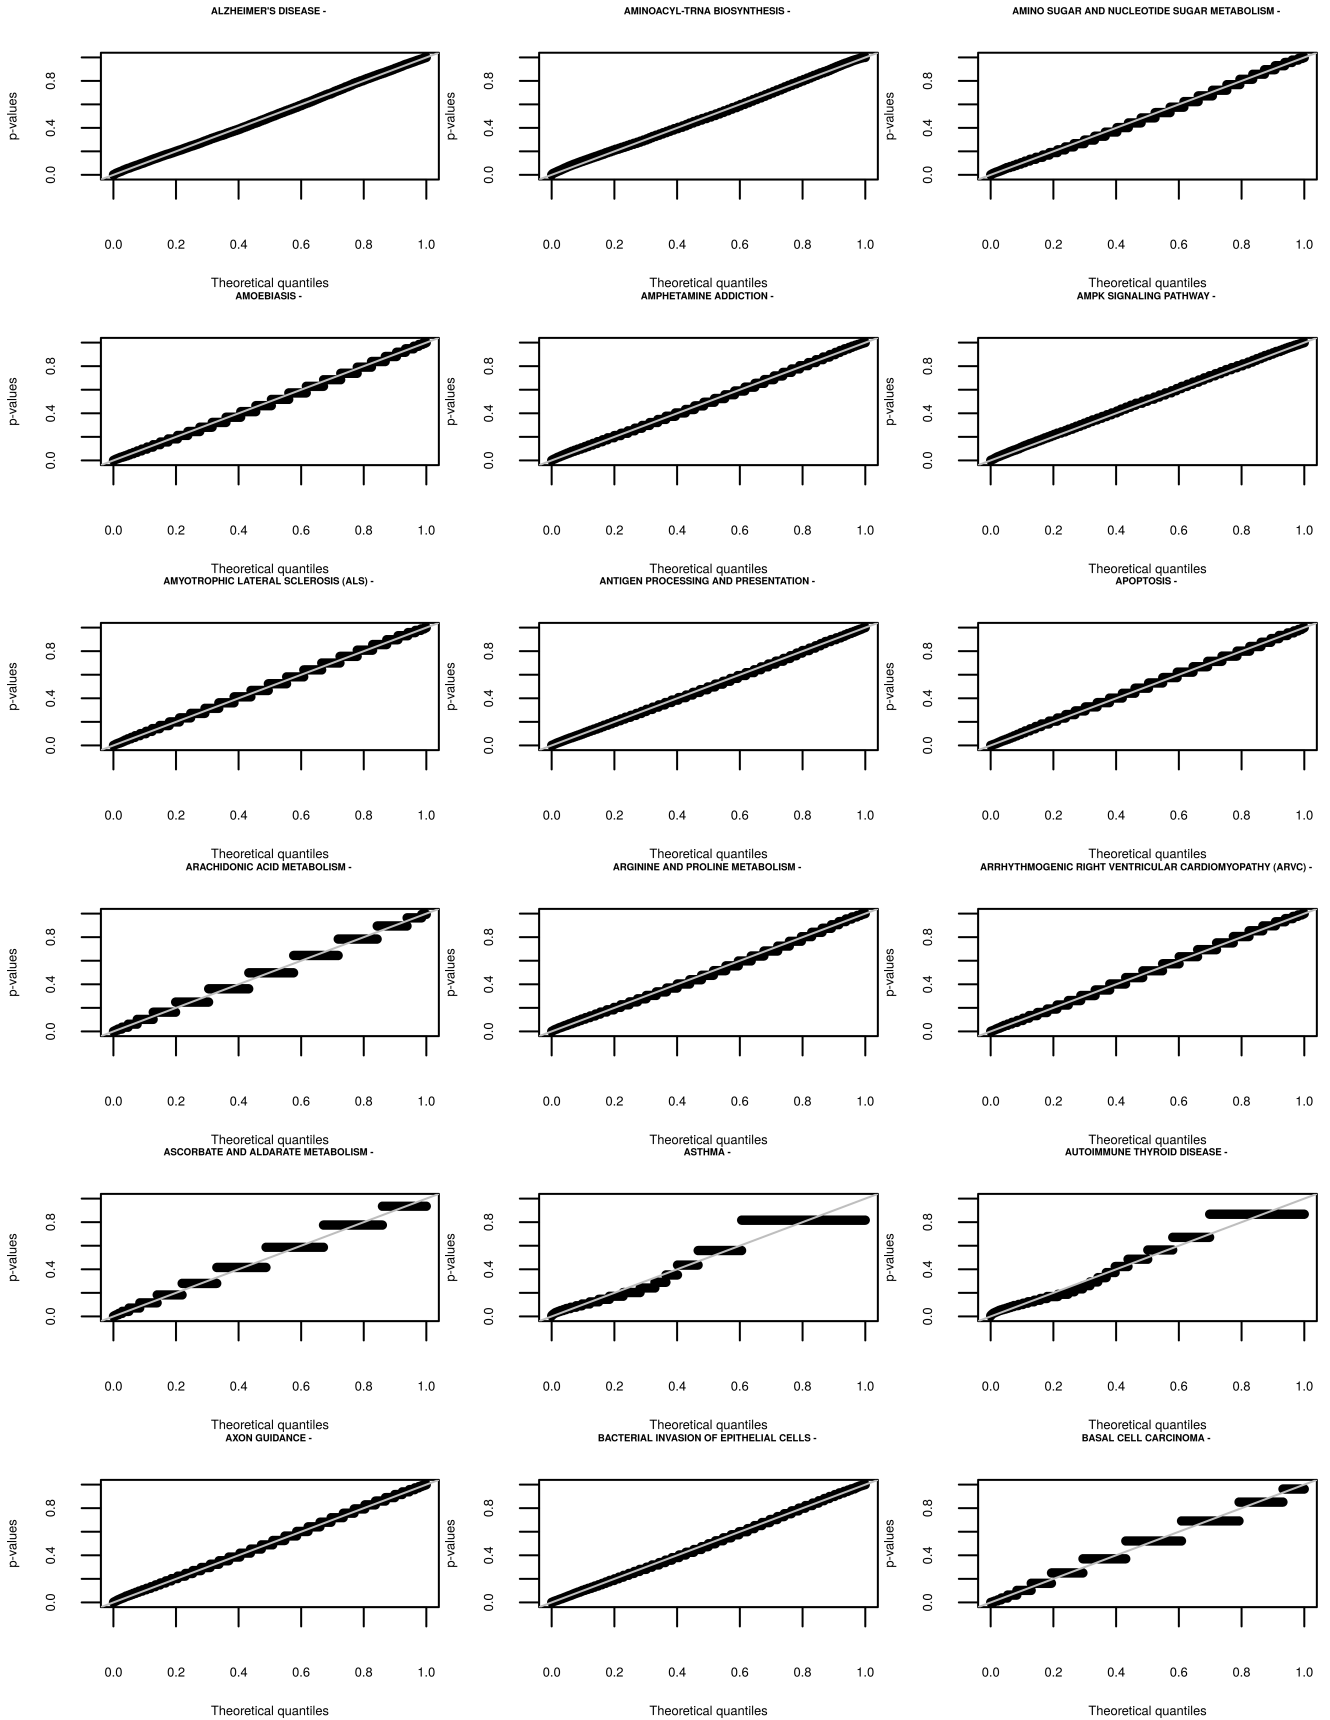

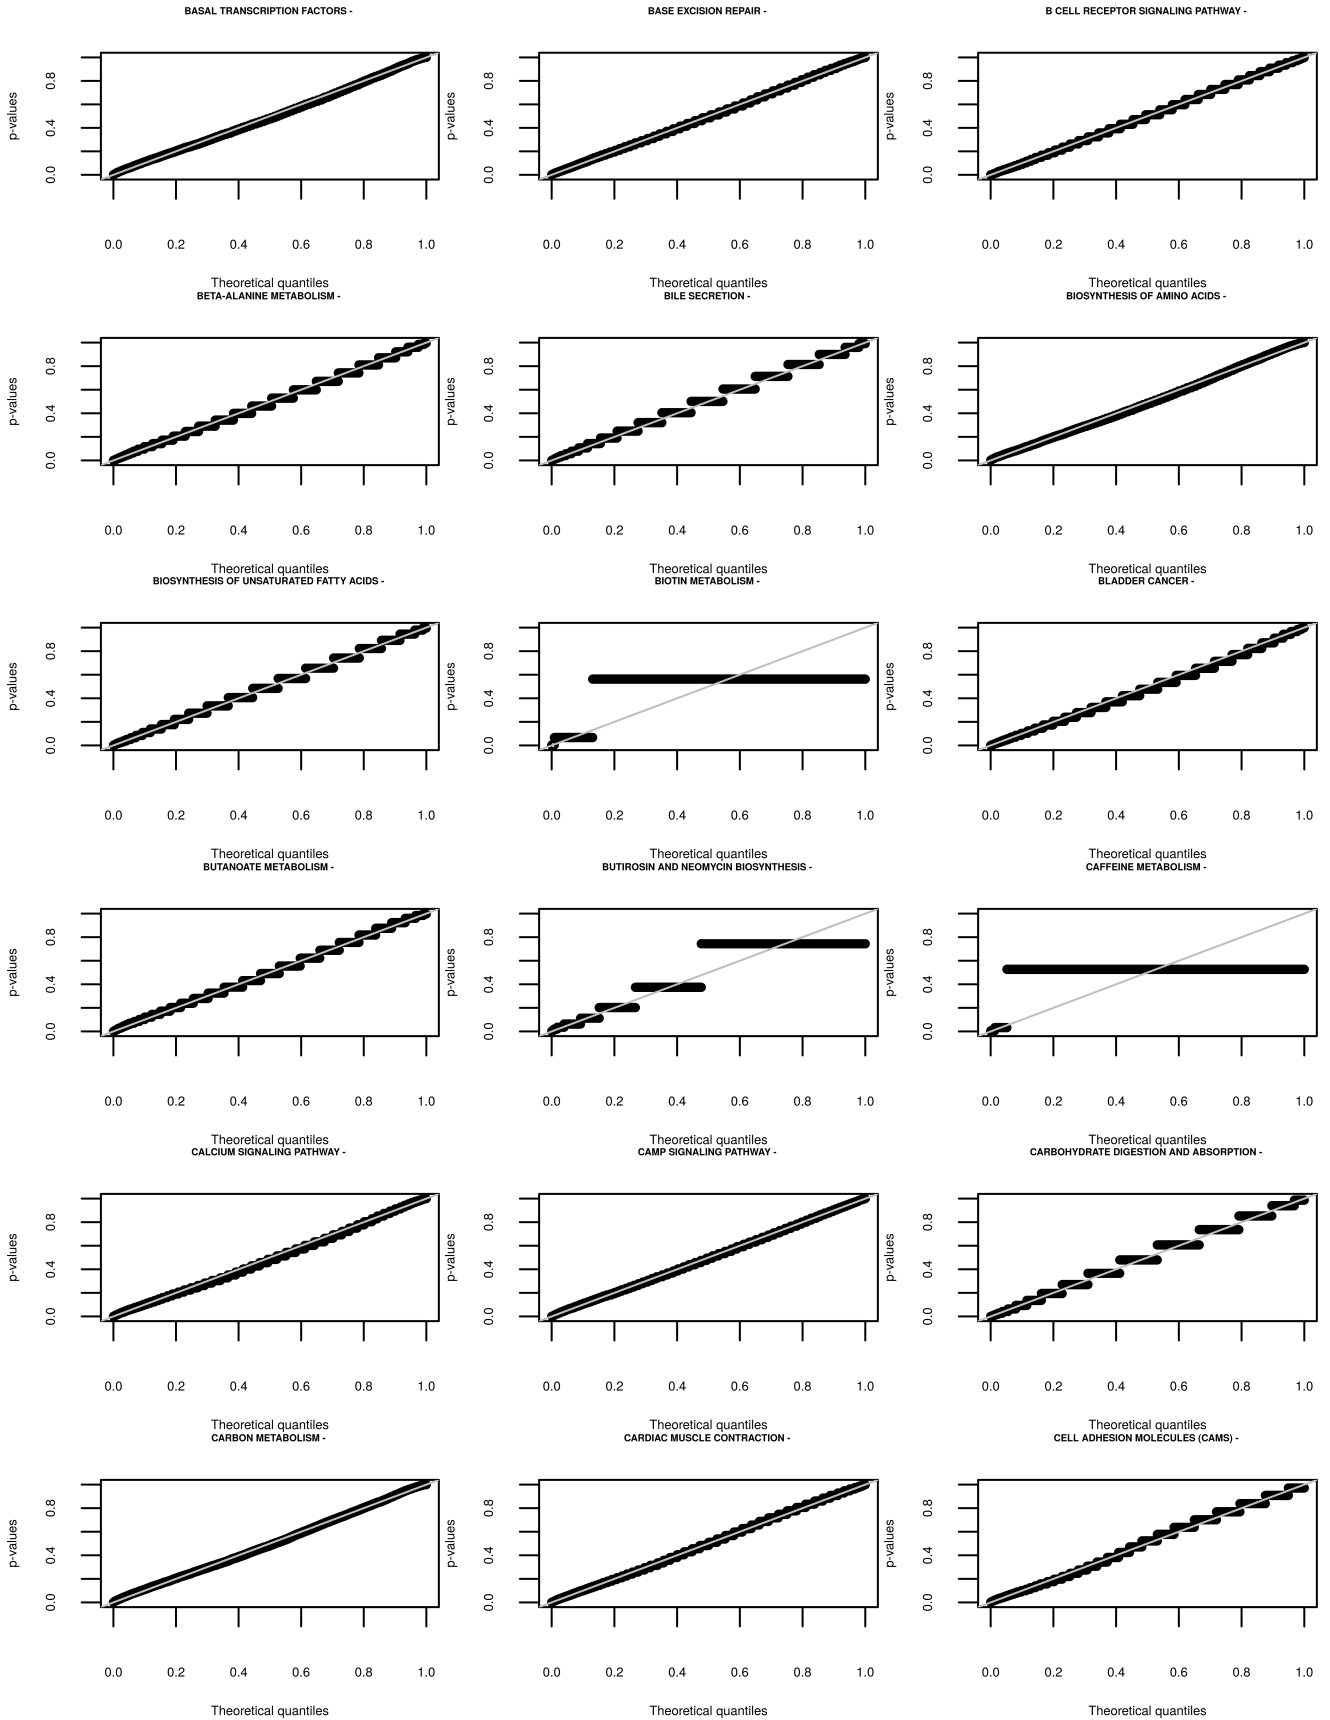

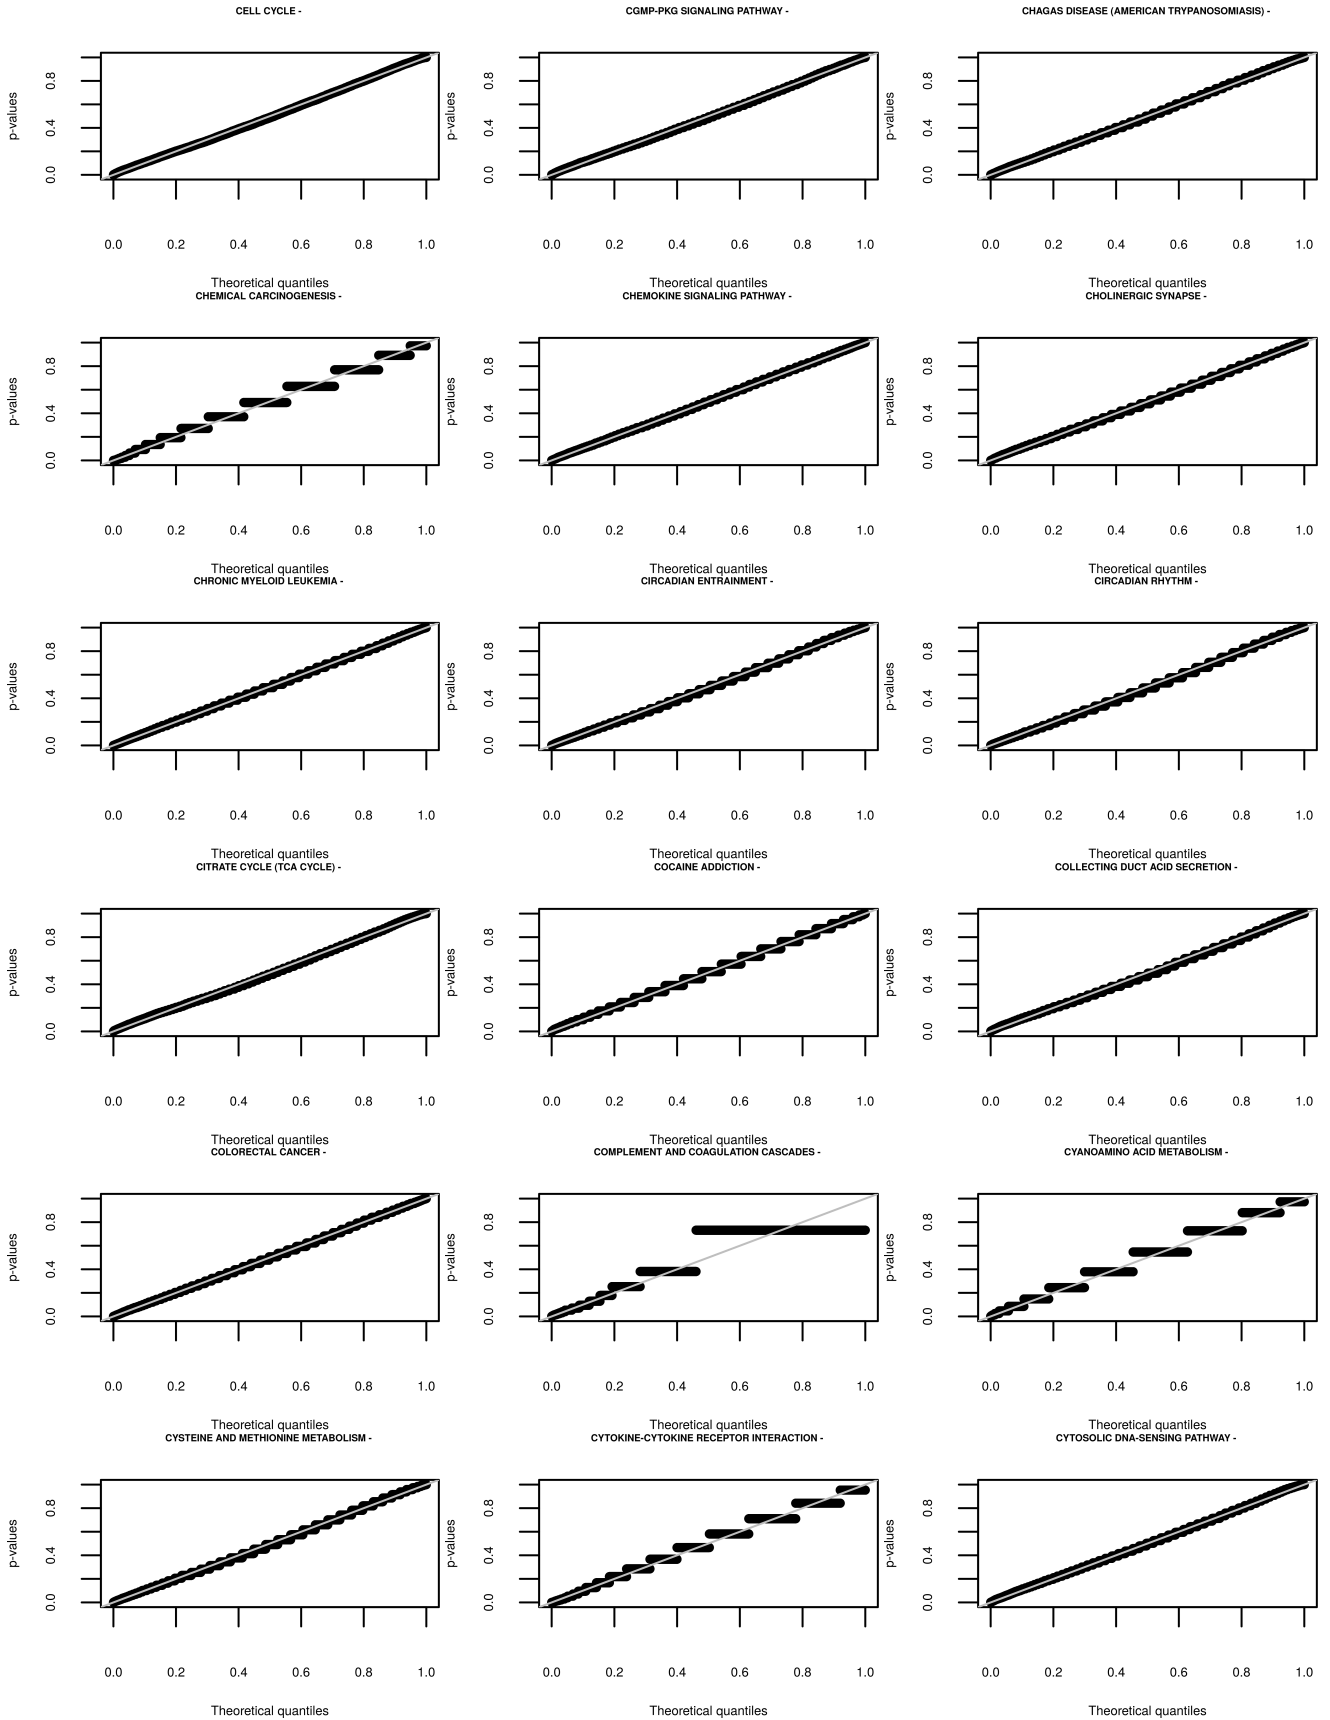

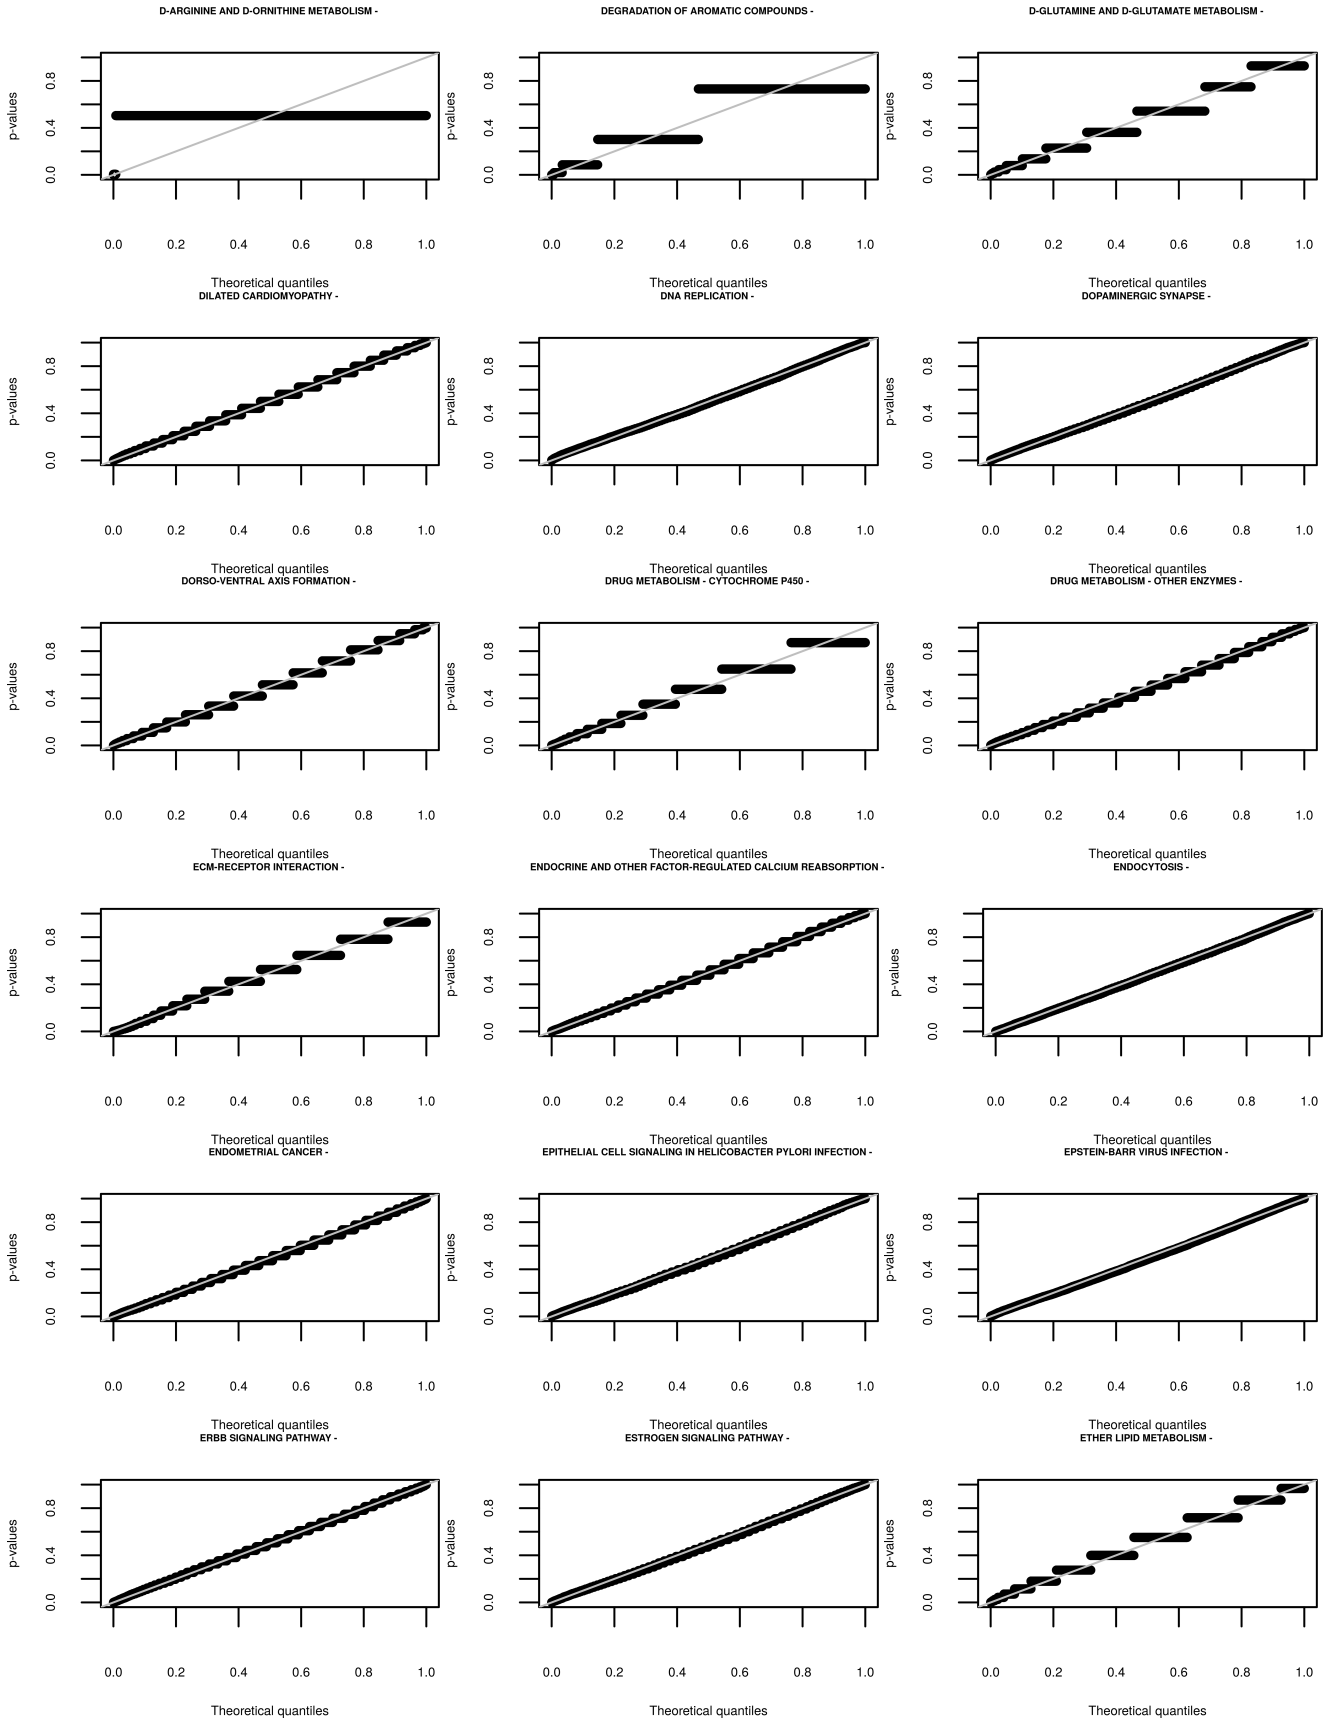

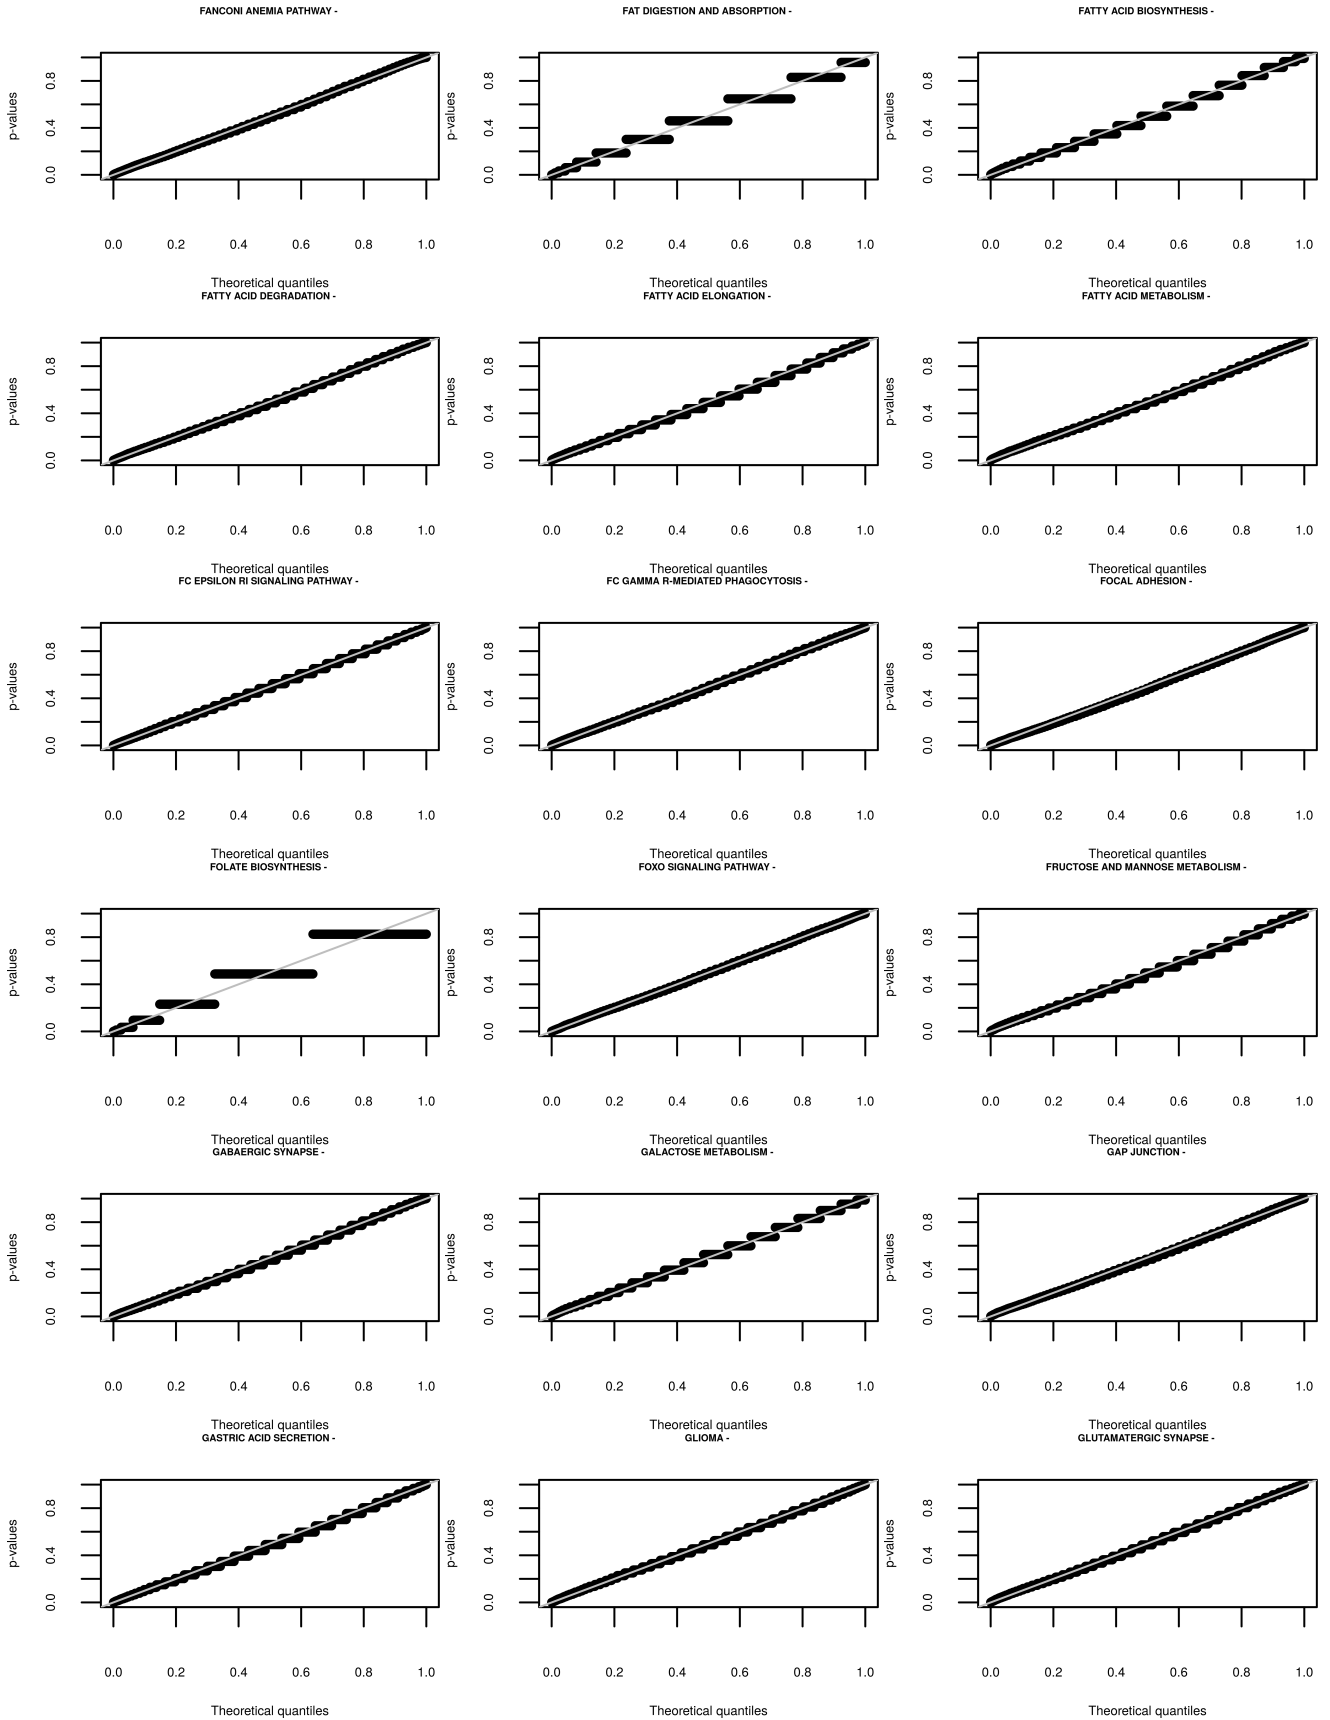

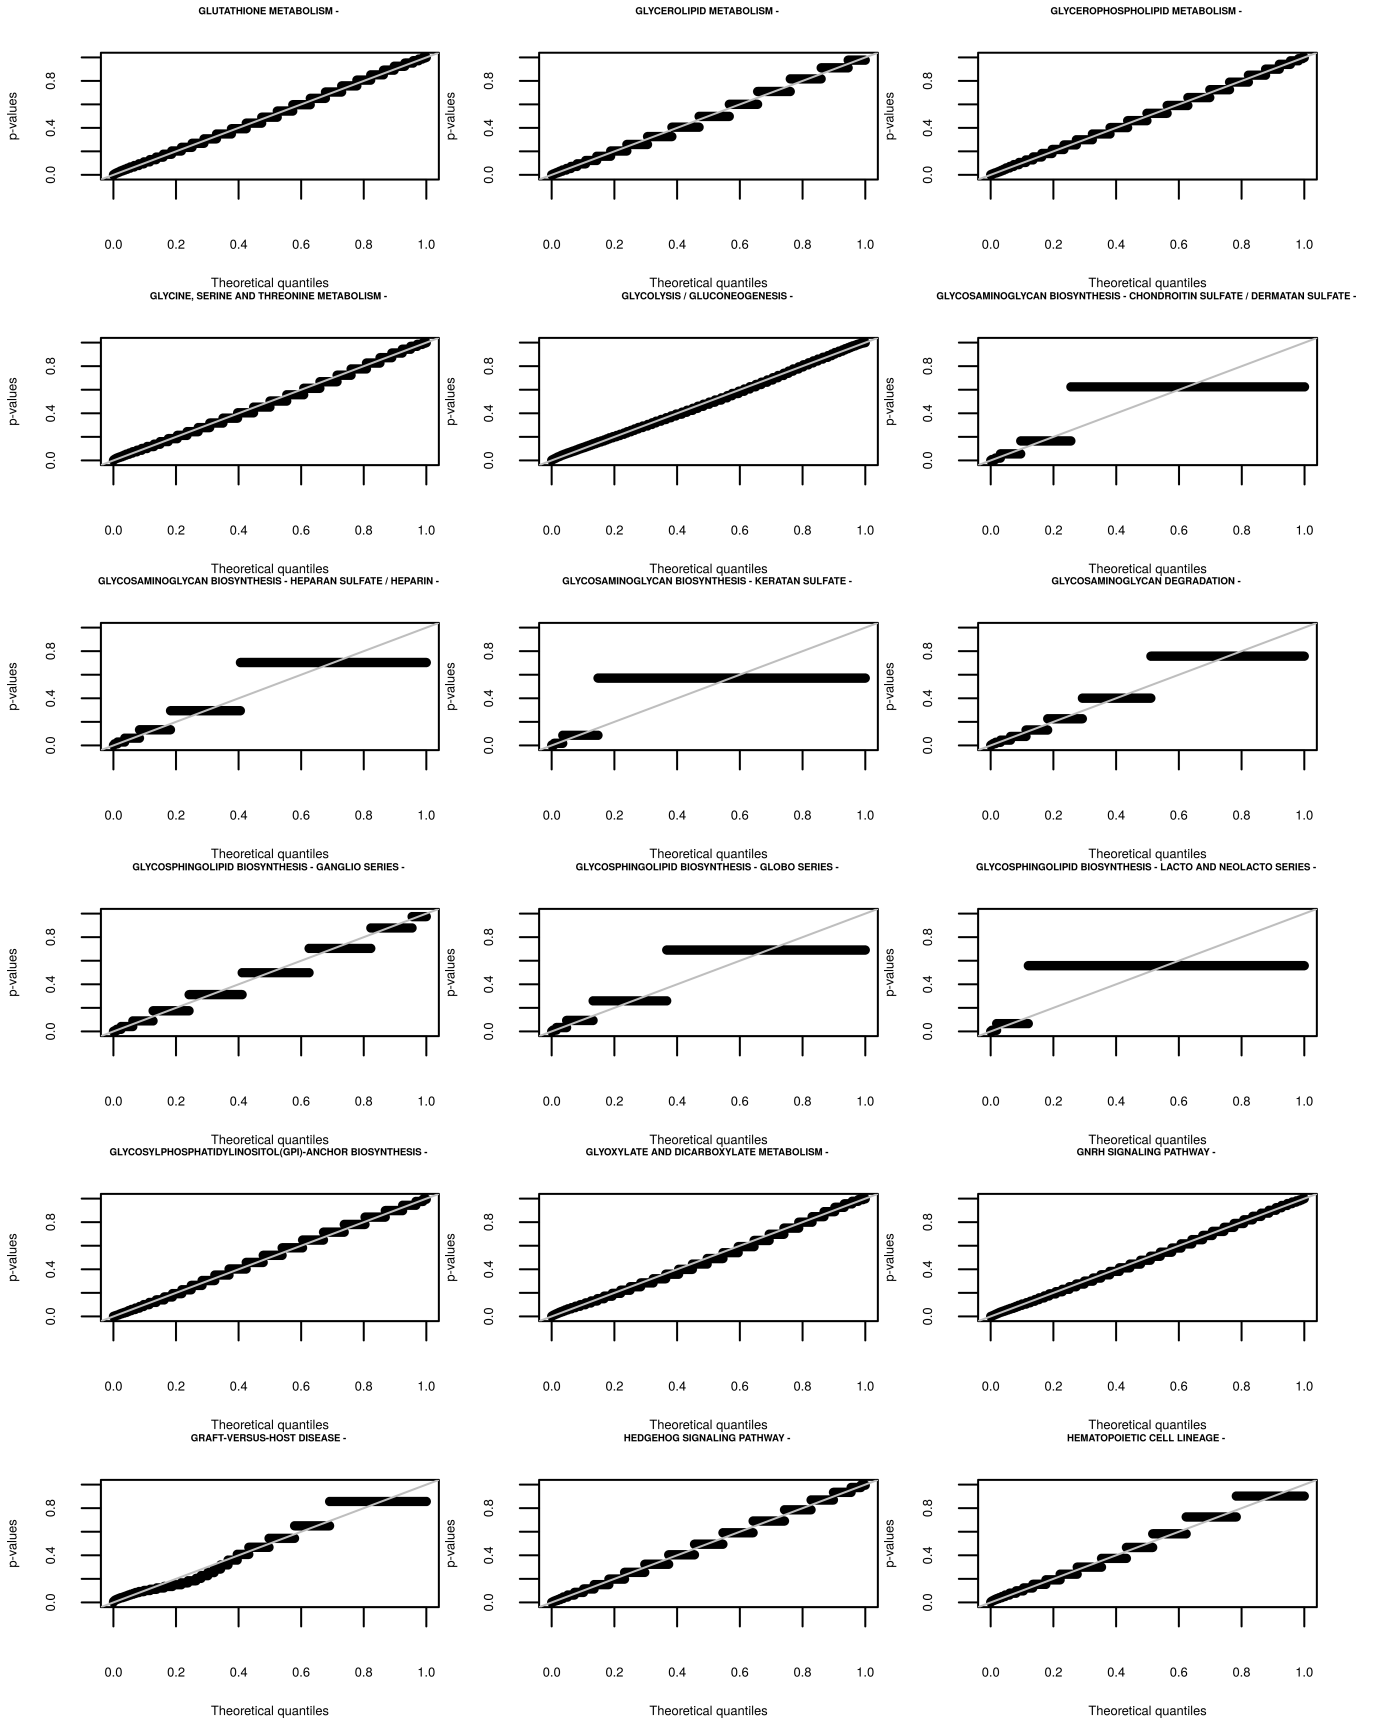



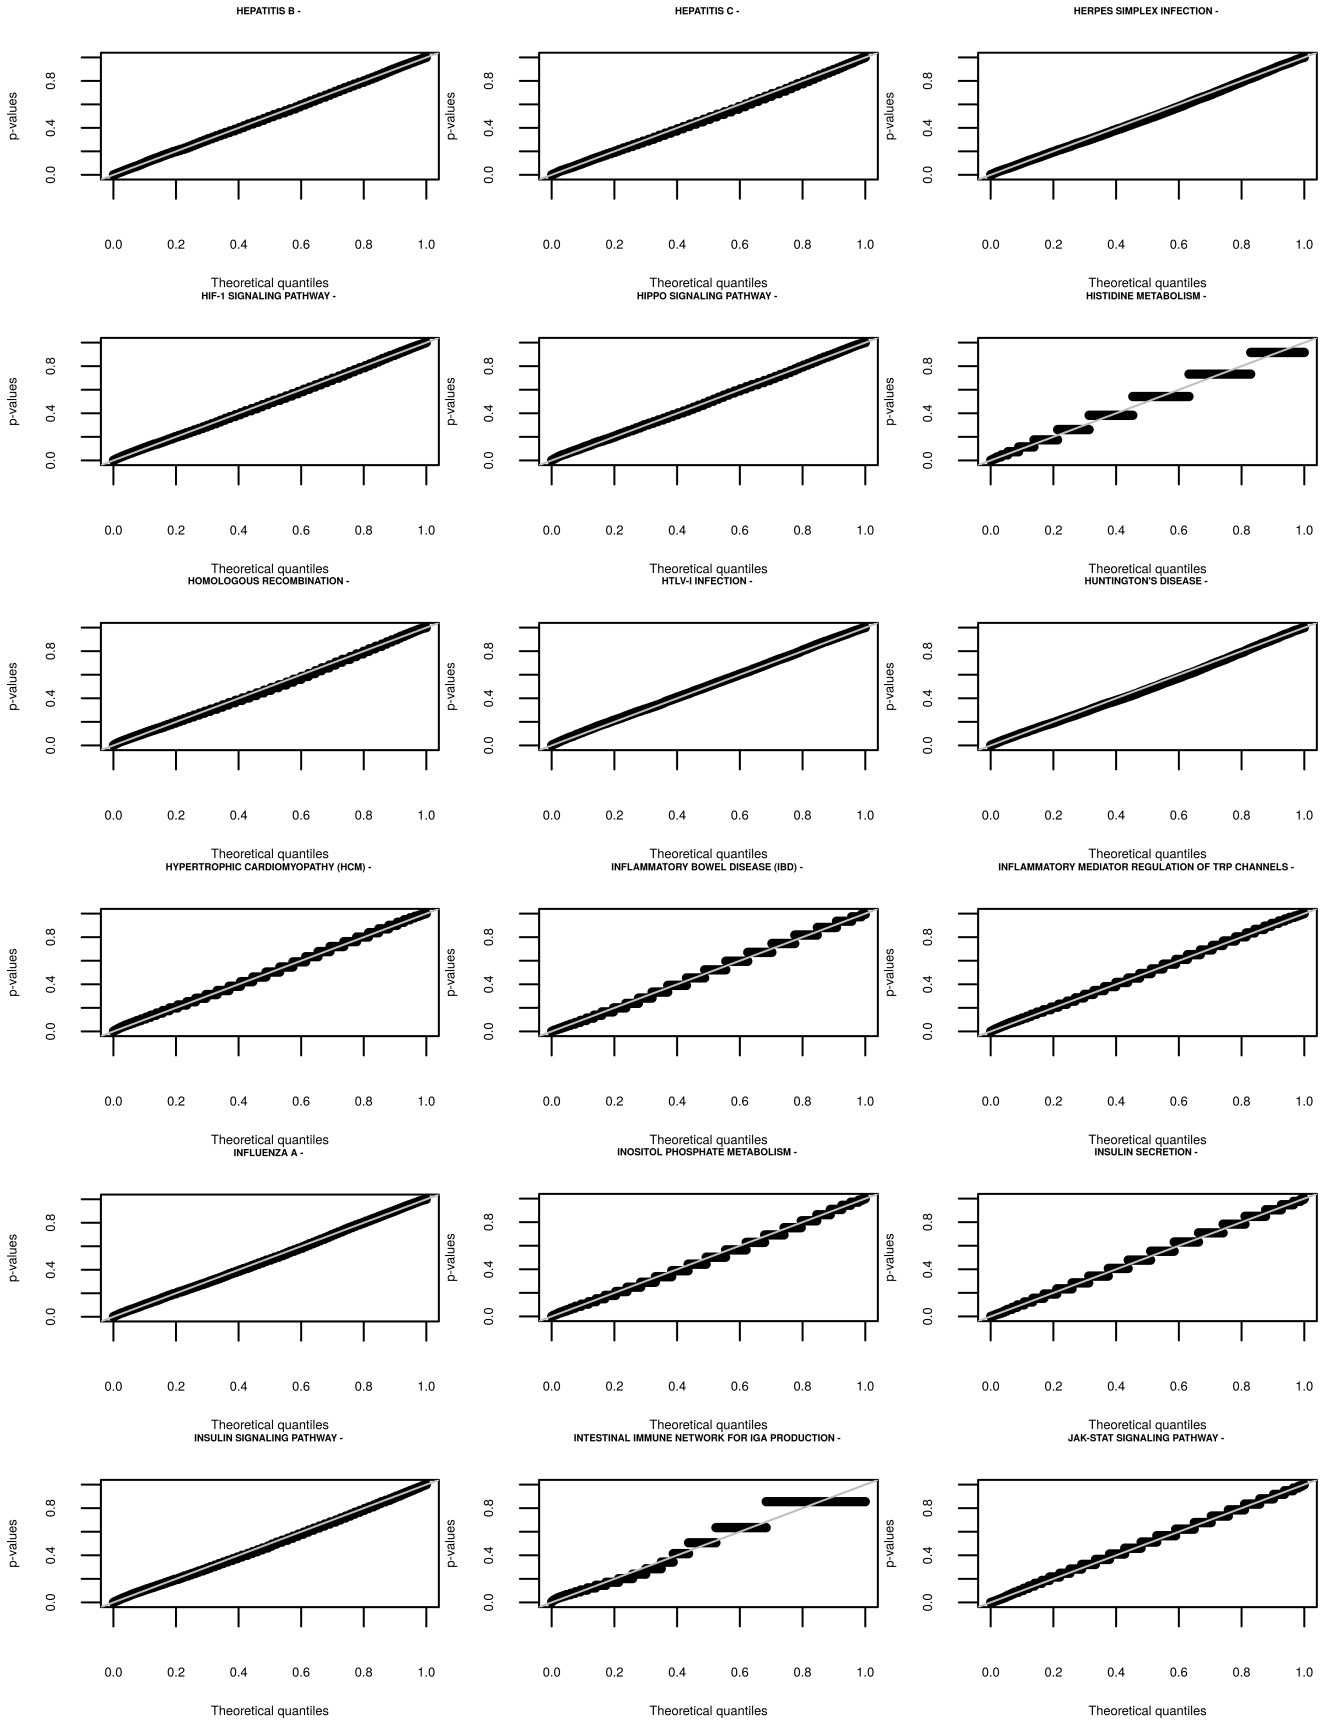

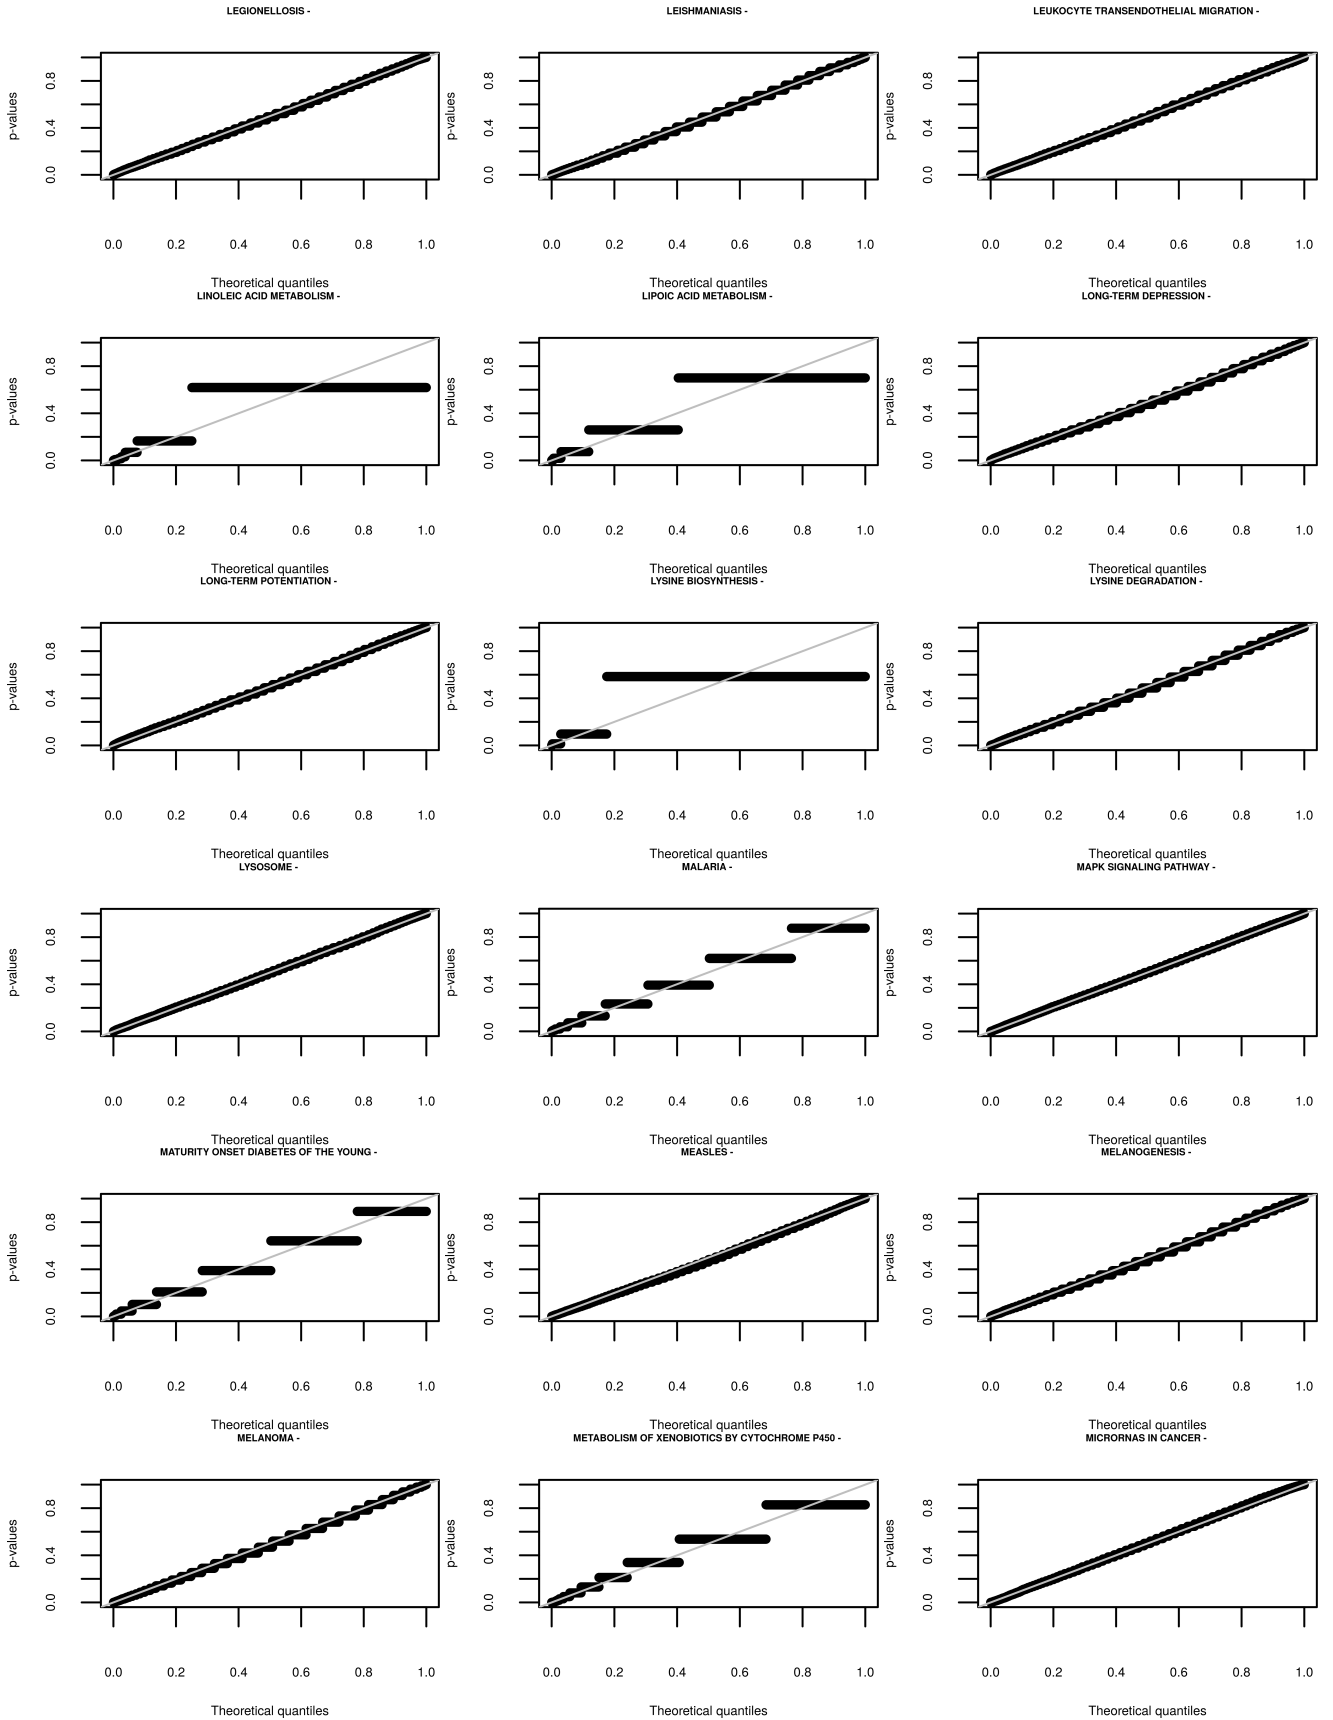

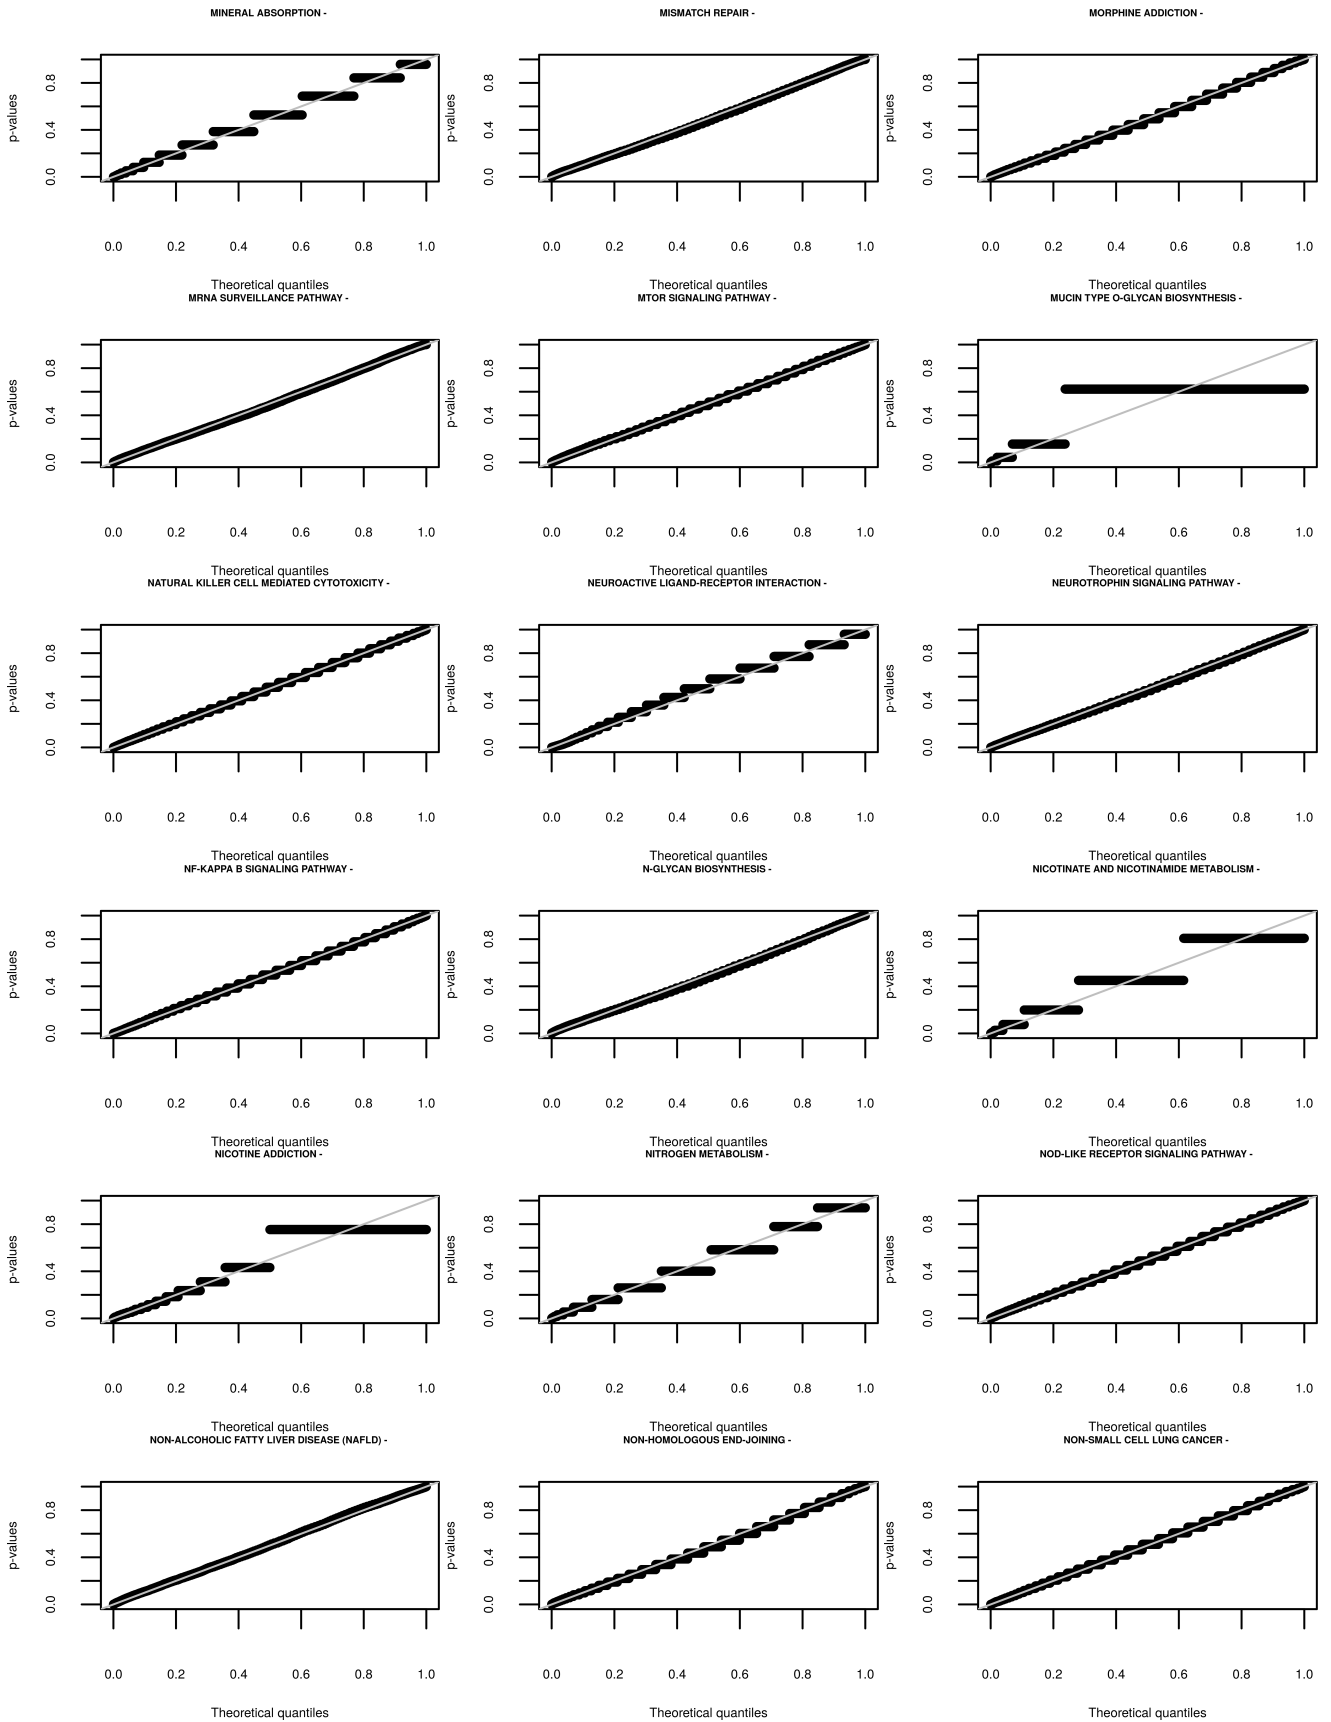

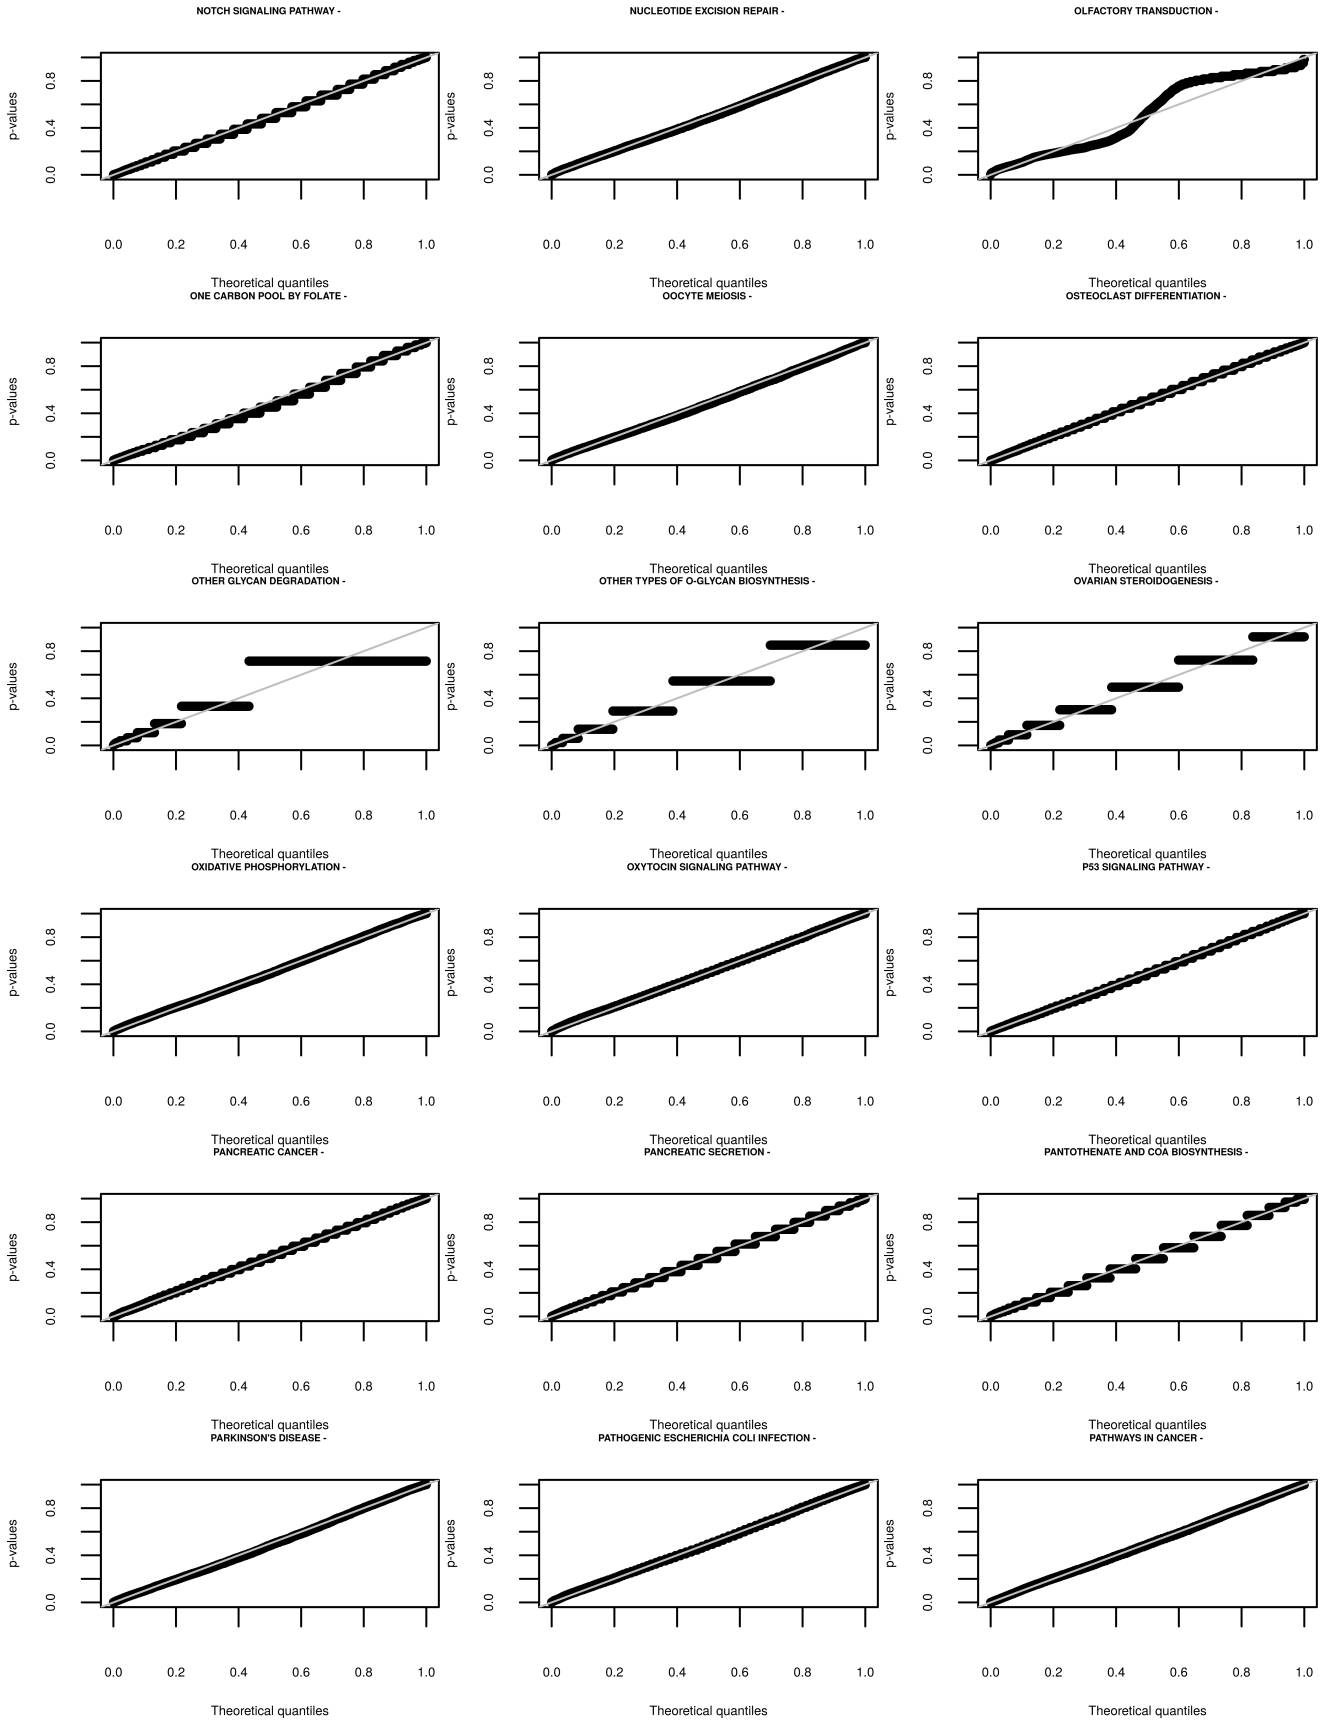

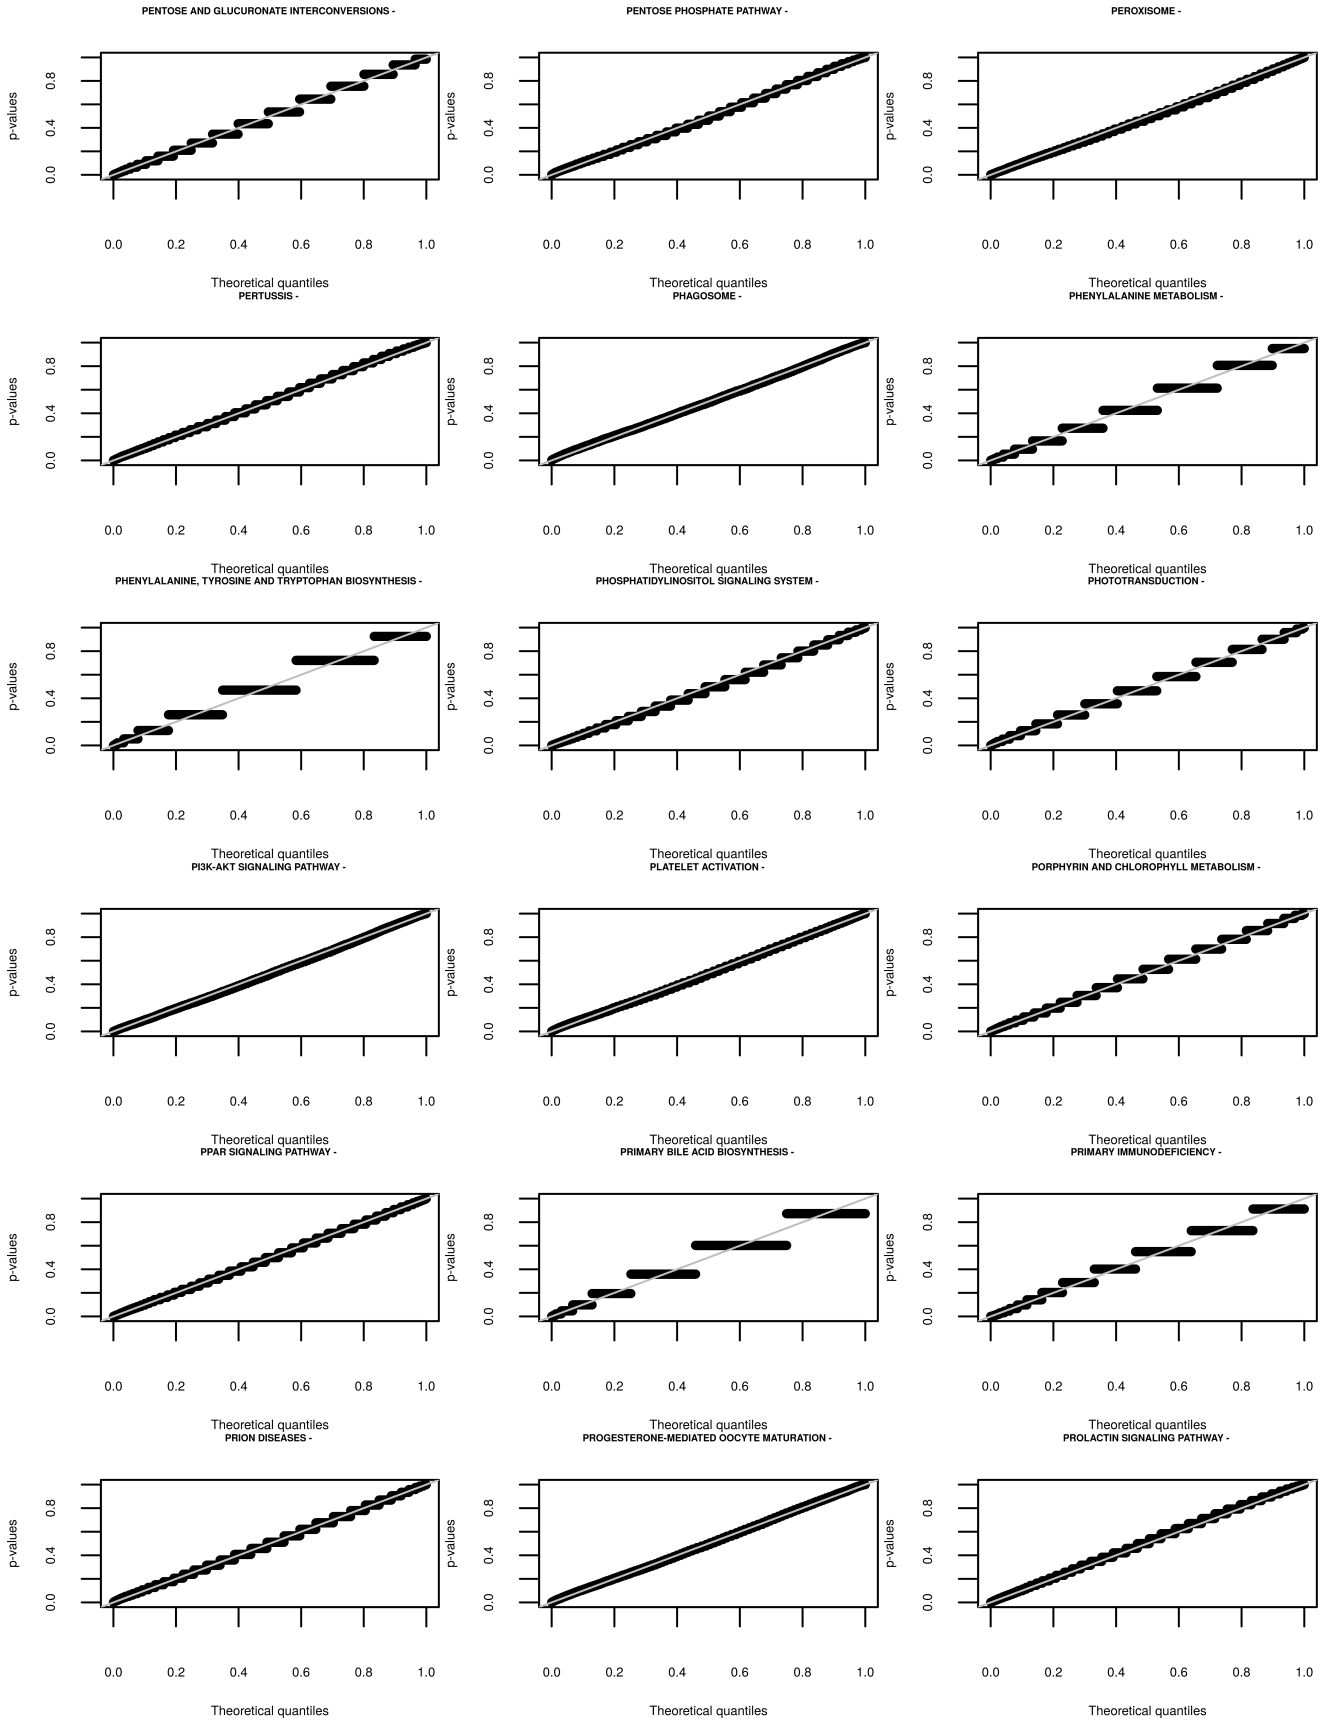

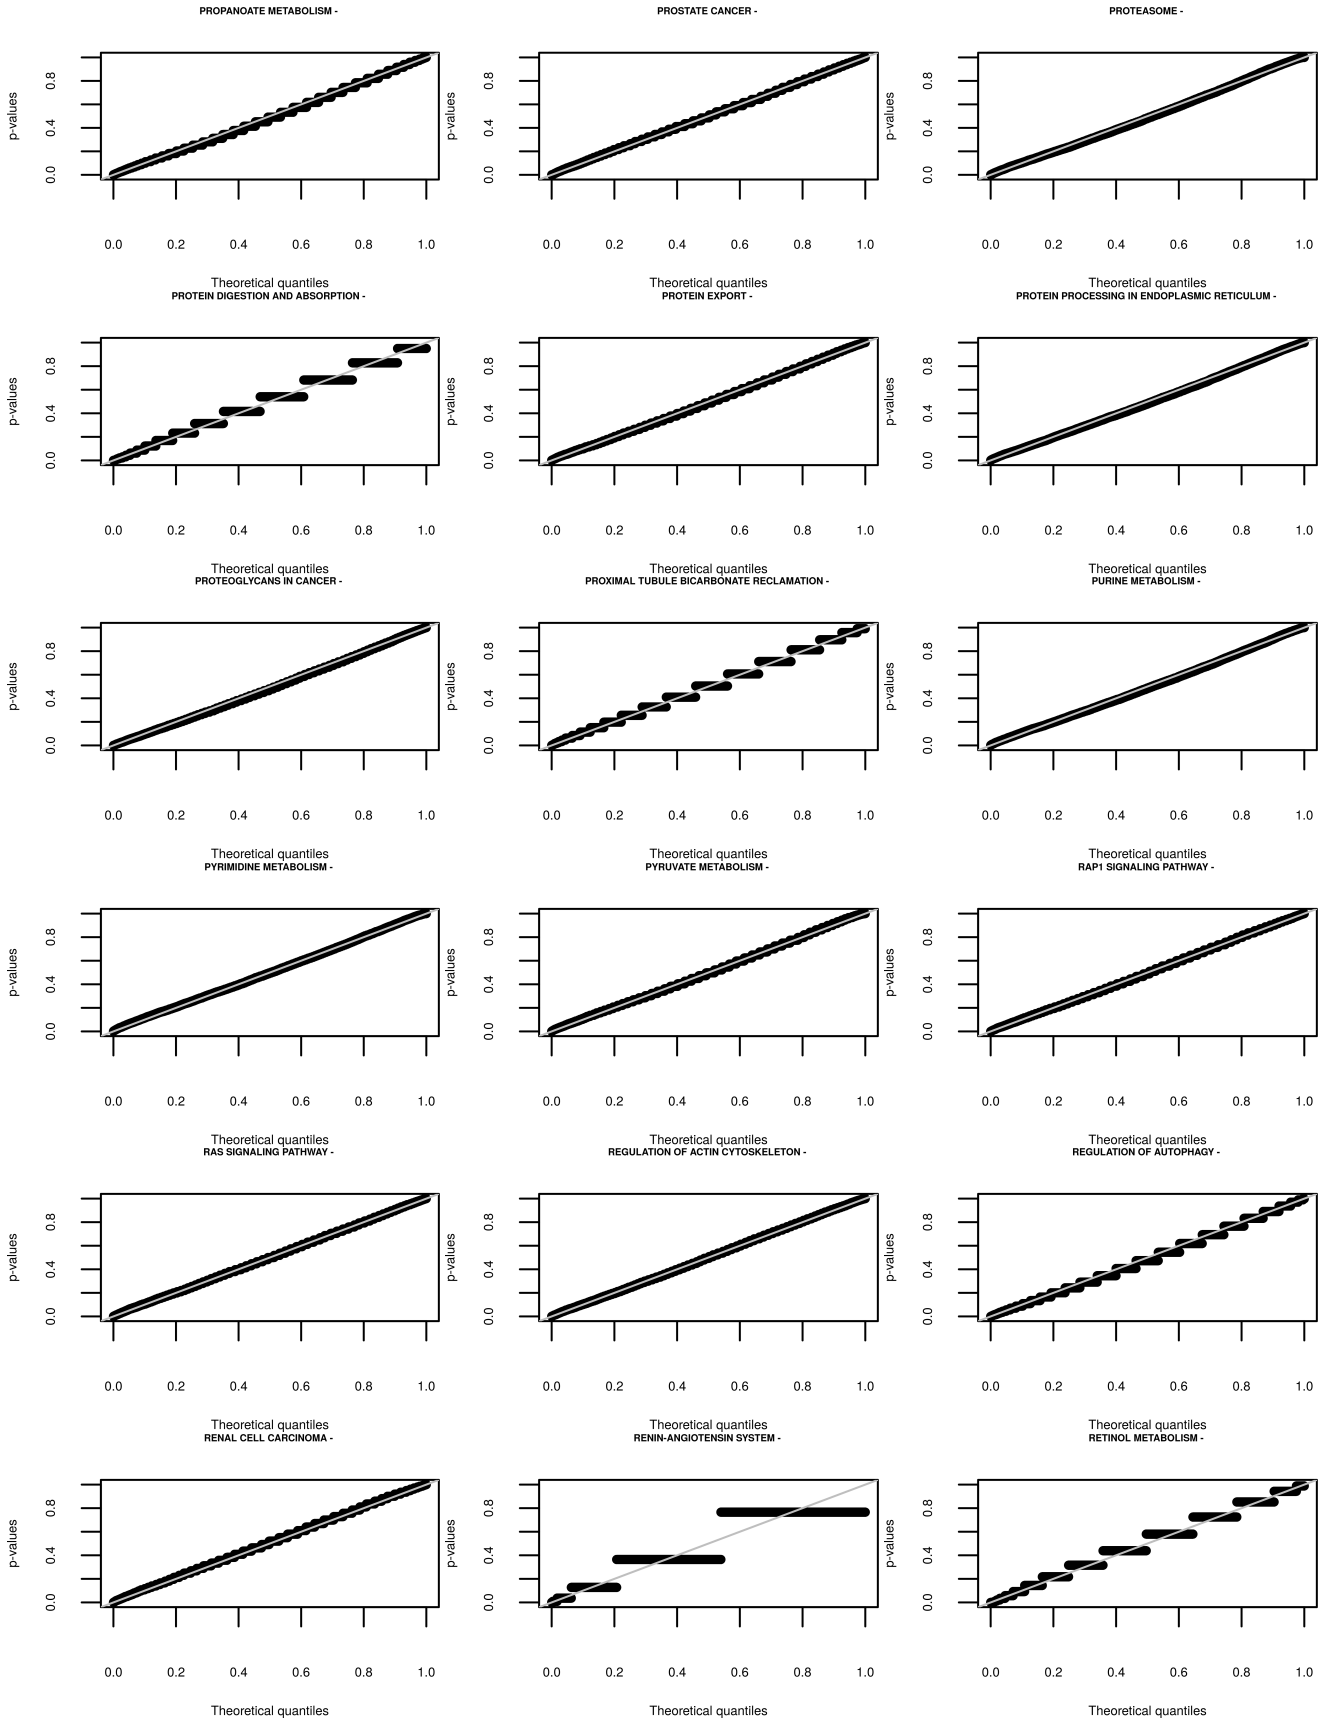

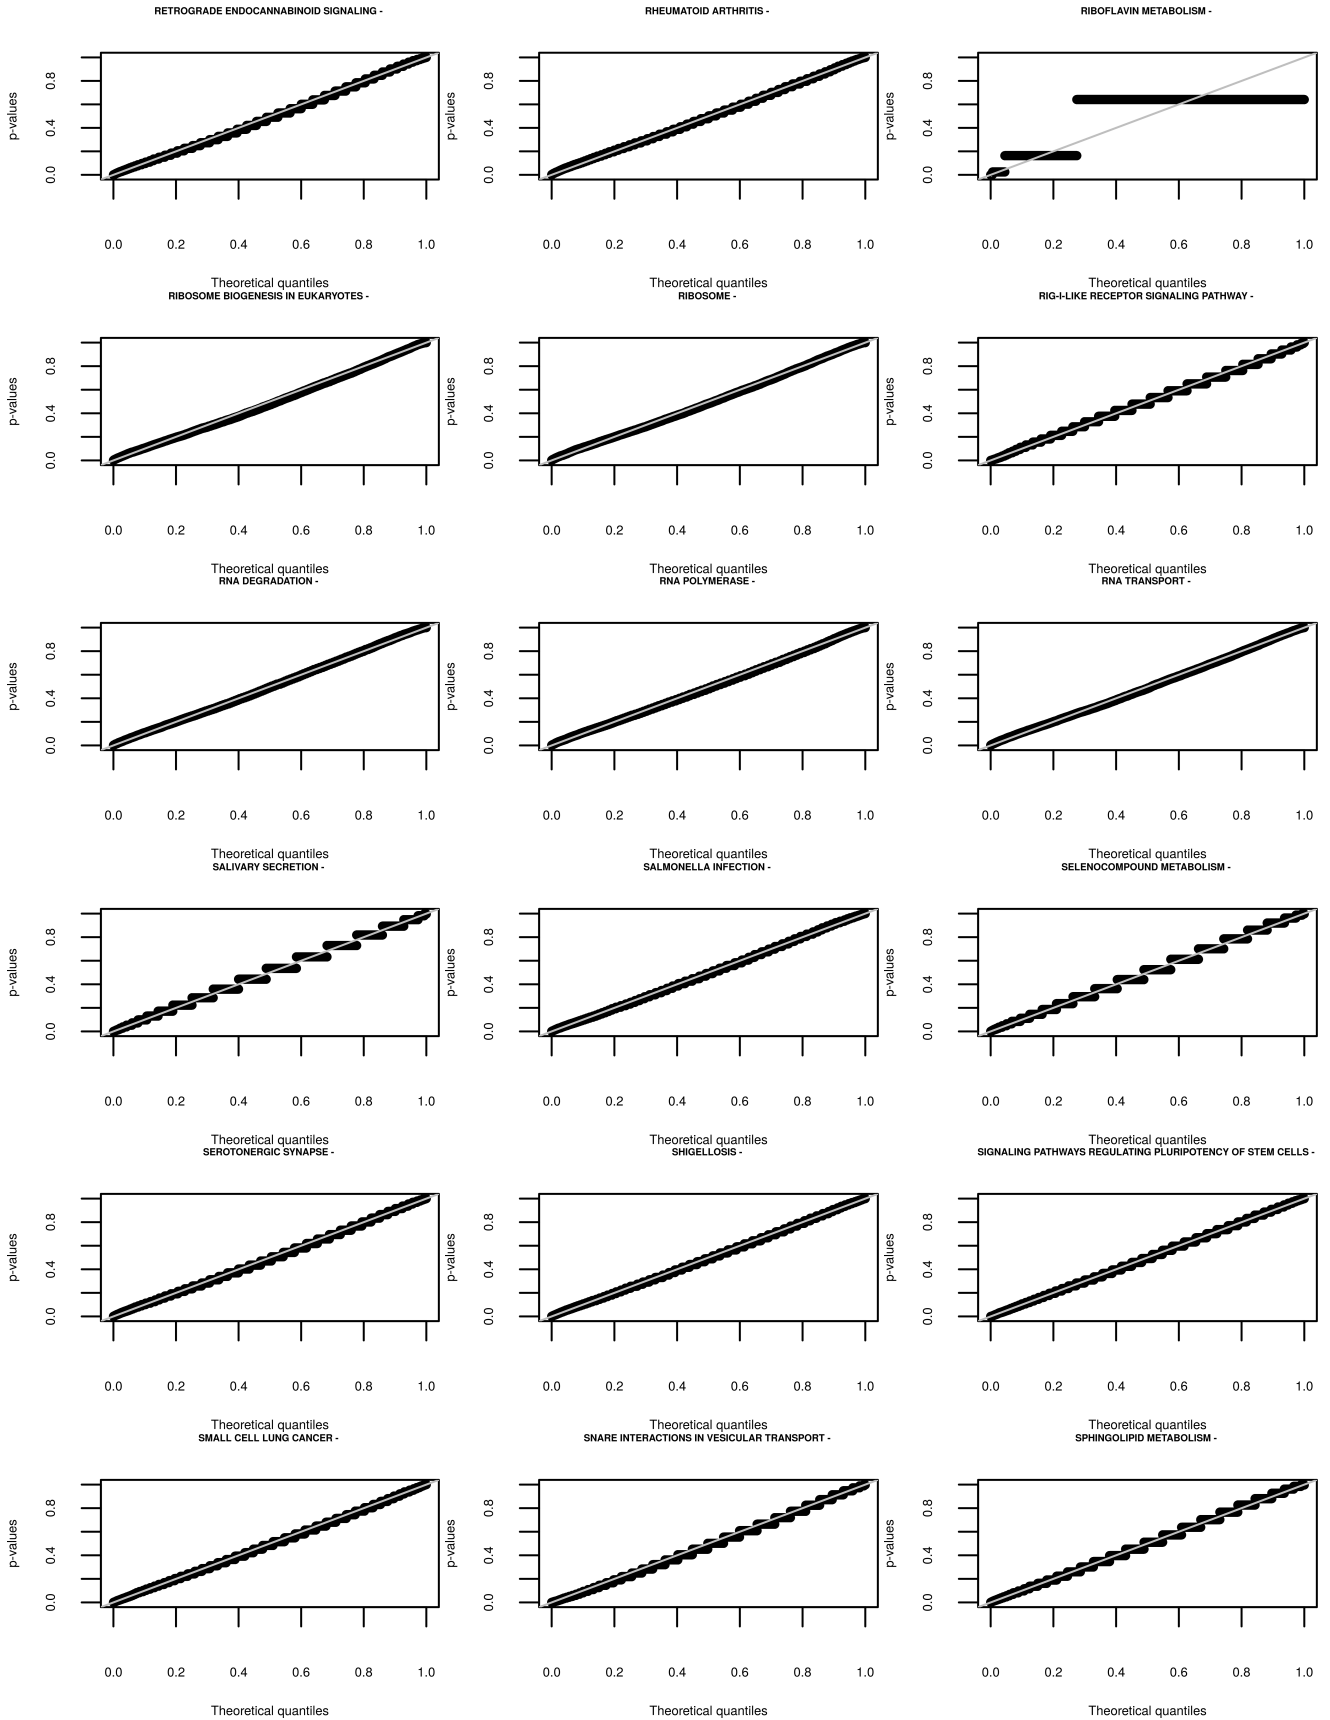

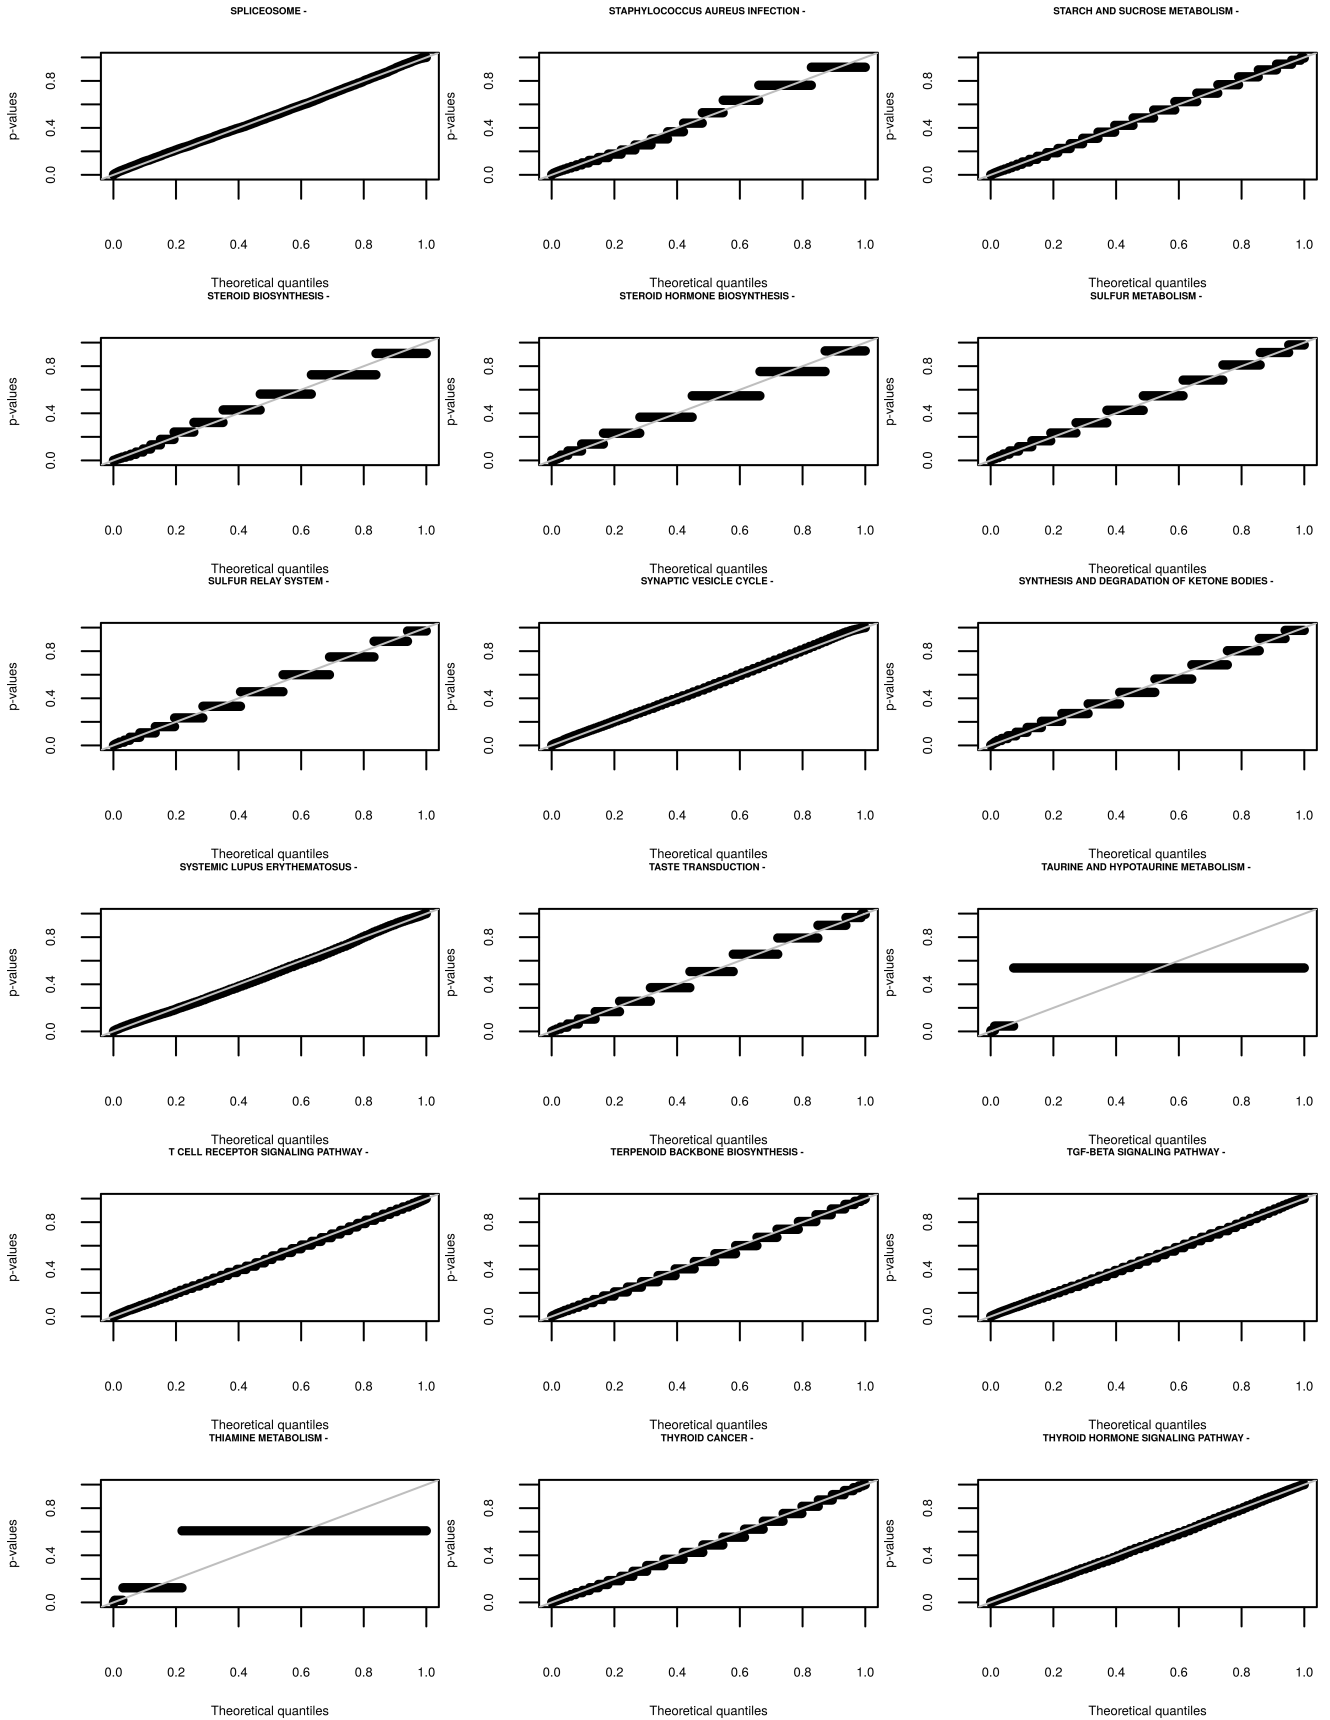



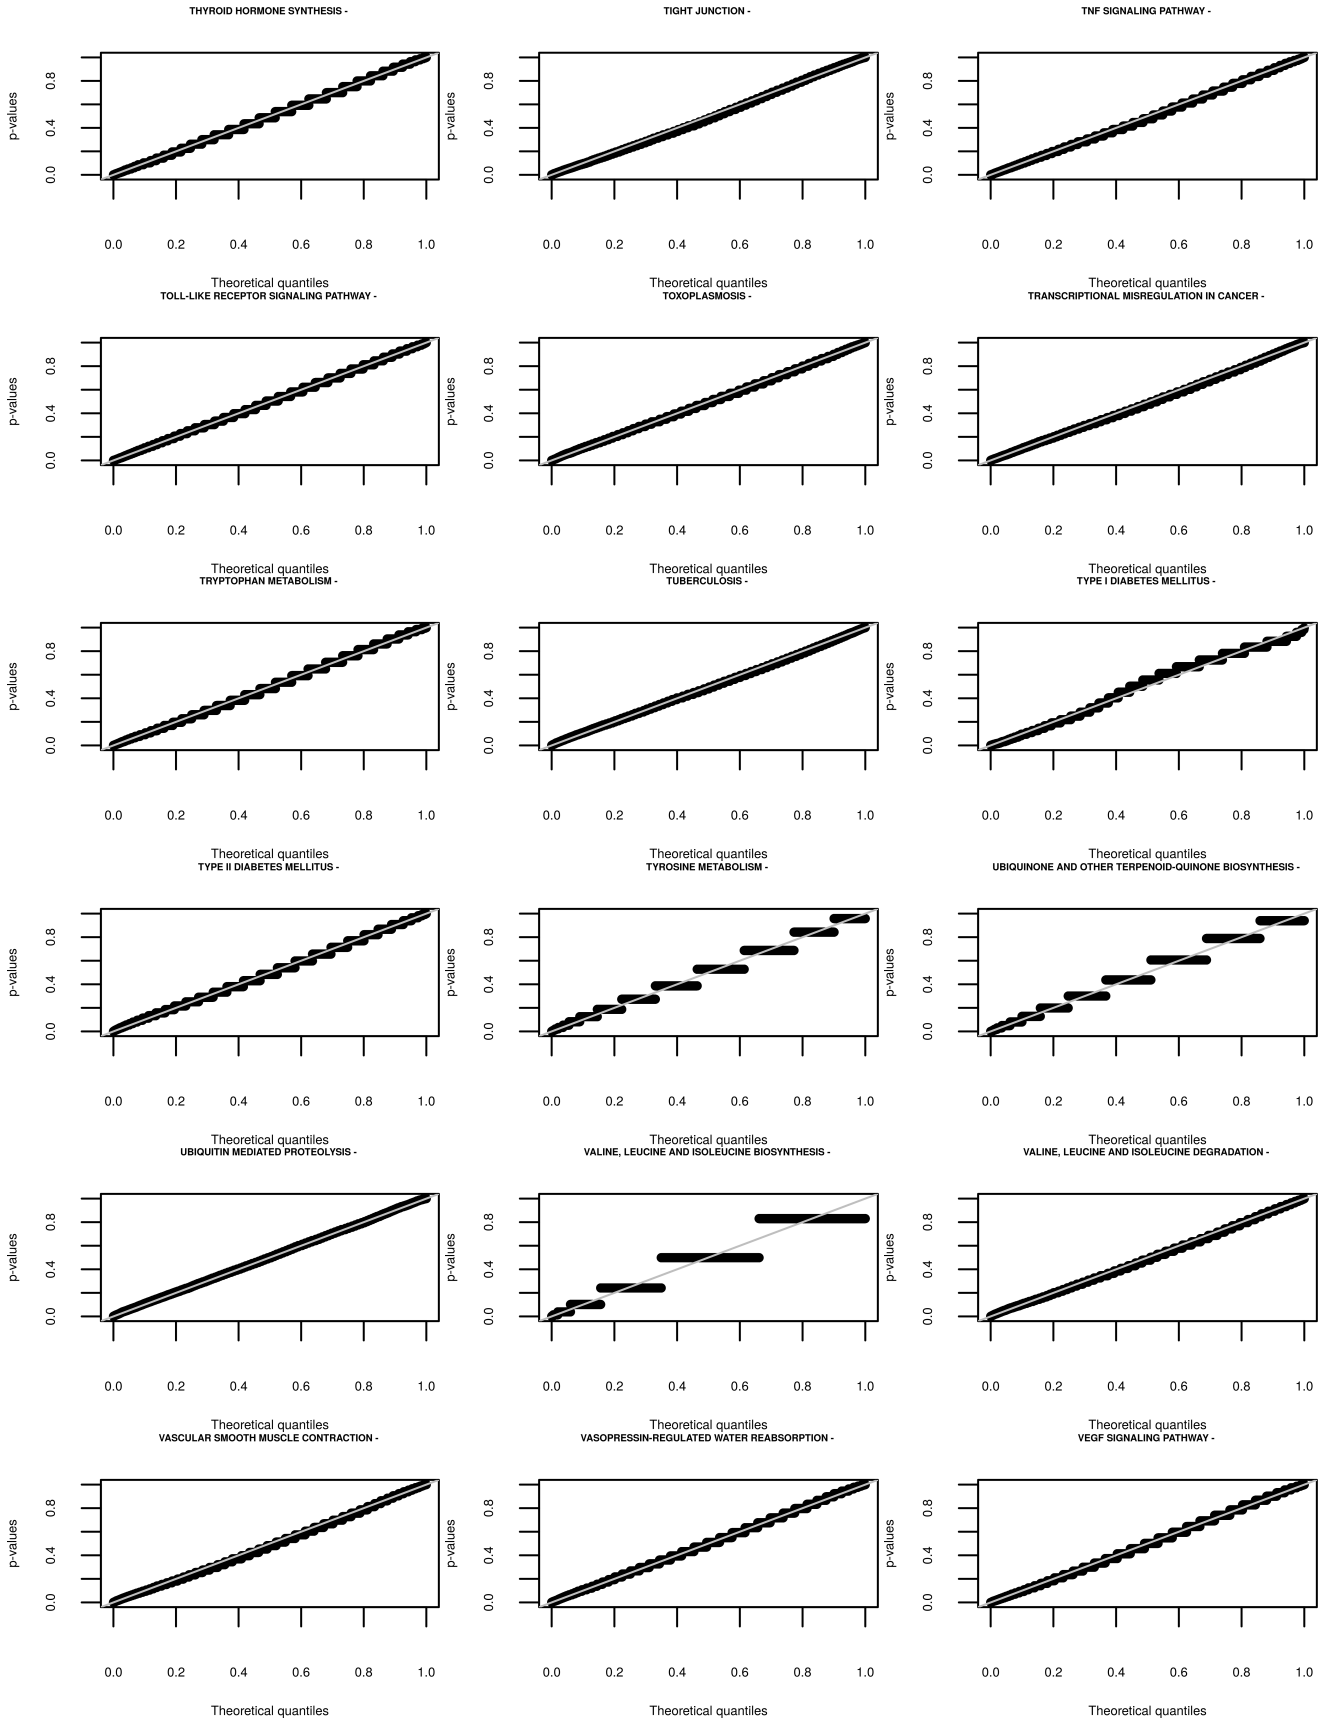

VIBRIO CHOLERAEE INFECTION -

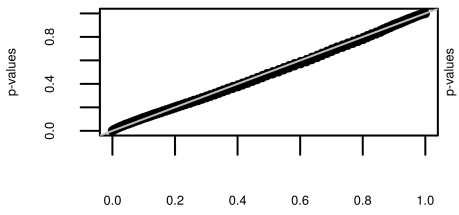

VIRAL CARCINOGENESIS -

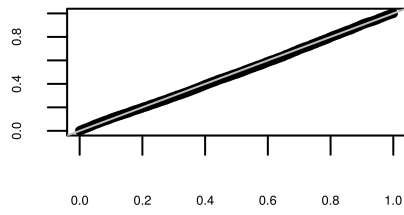

VIRAL MYOCARDITIS -

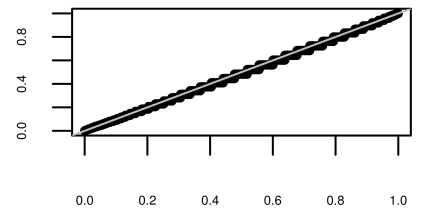

Theoretical quantiles  
VITAMIN B6 METABOLISM -

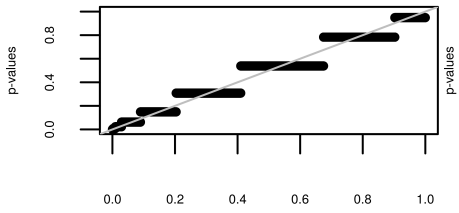

Theoretical quantiles  
VITAMIN DIGESTION AND ABSORPTION -

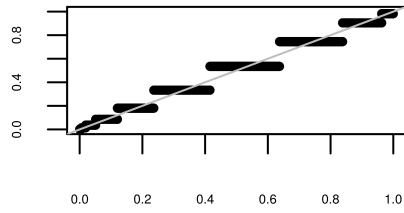

Theoretical quantiles  
WNT SIGNALING PATHWAY -

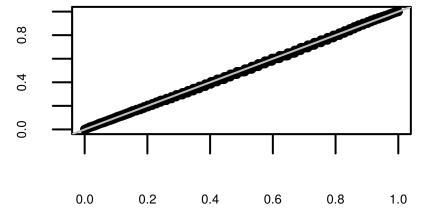

# Pathway-specific model estimation for improved pathway annotation by network crosstalk

*Miguel Castresana-Aguirre, Erik L.L. Sonnhammer\**

Department of Biochemistry and Biophysics, Stockholm University, Science for Life Laboratory, Box 1031, 17121 Solna, Sweden,

\*To whom correspondence should be addressed: erik.sonnhammer@dbb.su.se

**Supplementary Figure 3:** 10000 random gene sets of size 200 are run against KEGG pathways. P-value uniformity test of ANUBIX. Reported p-values are plotted against theoretical quantile (rank). Software: R version 3.4.3 <https://www.r-project.org/>.

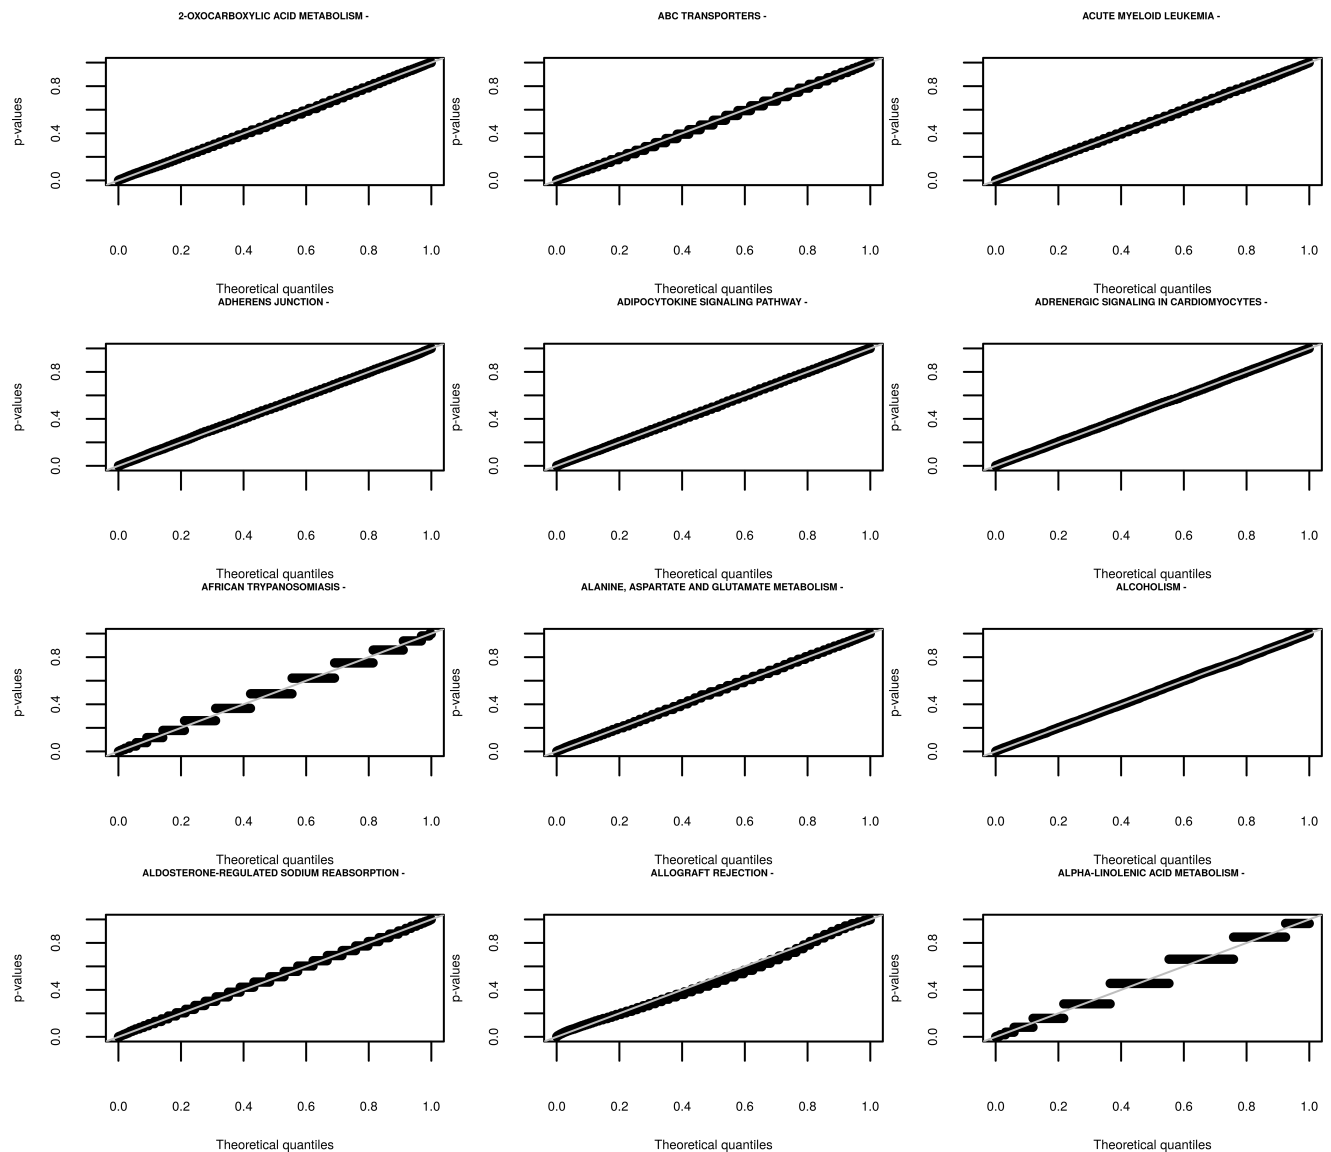

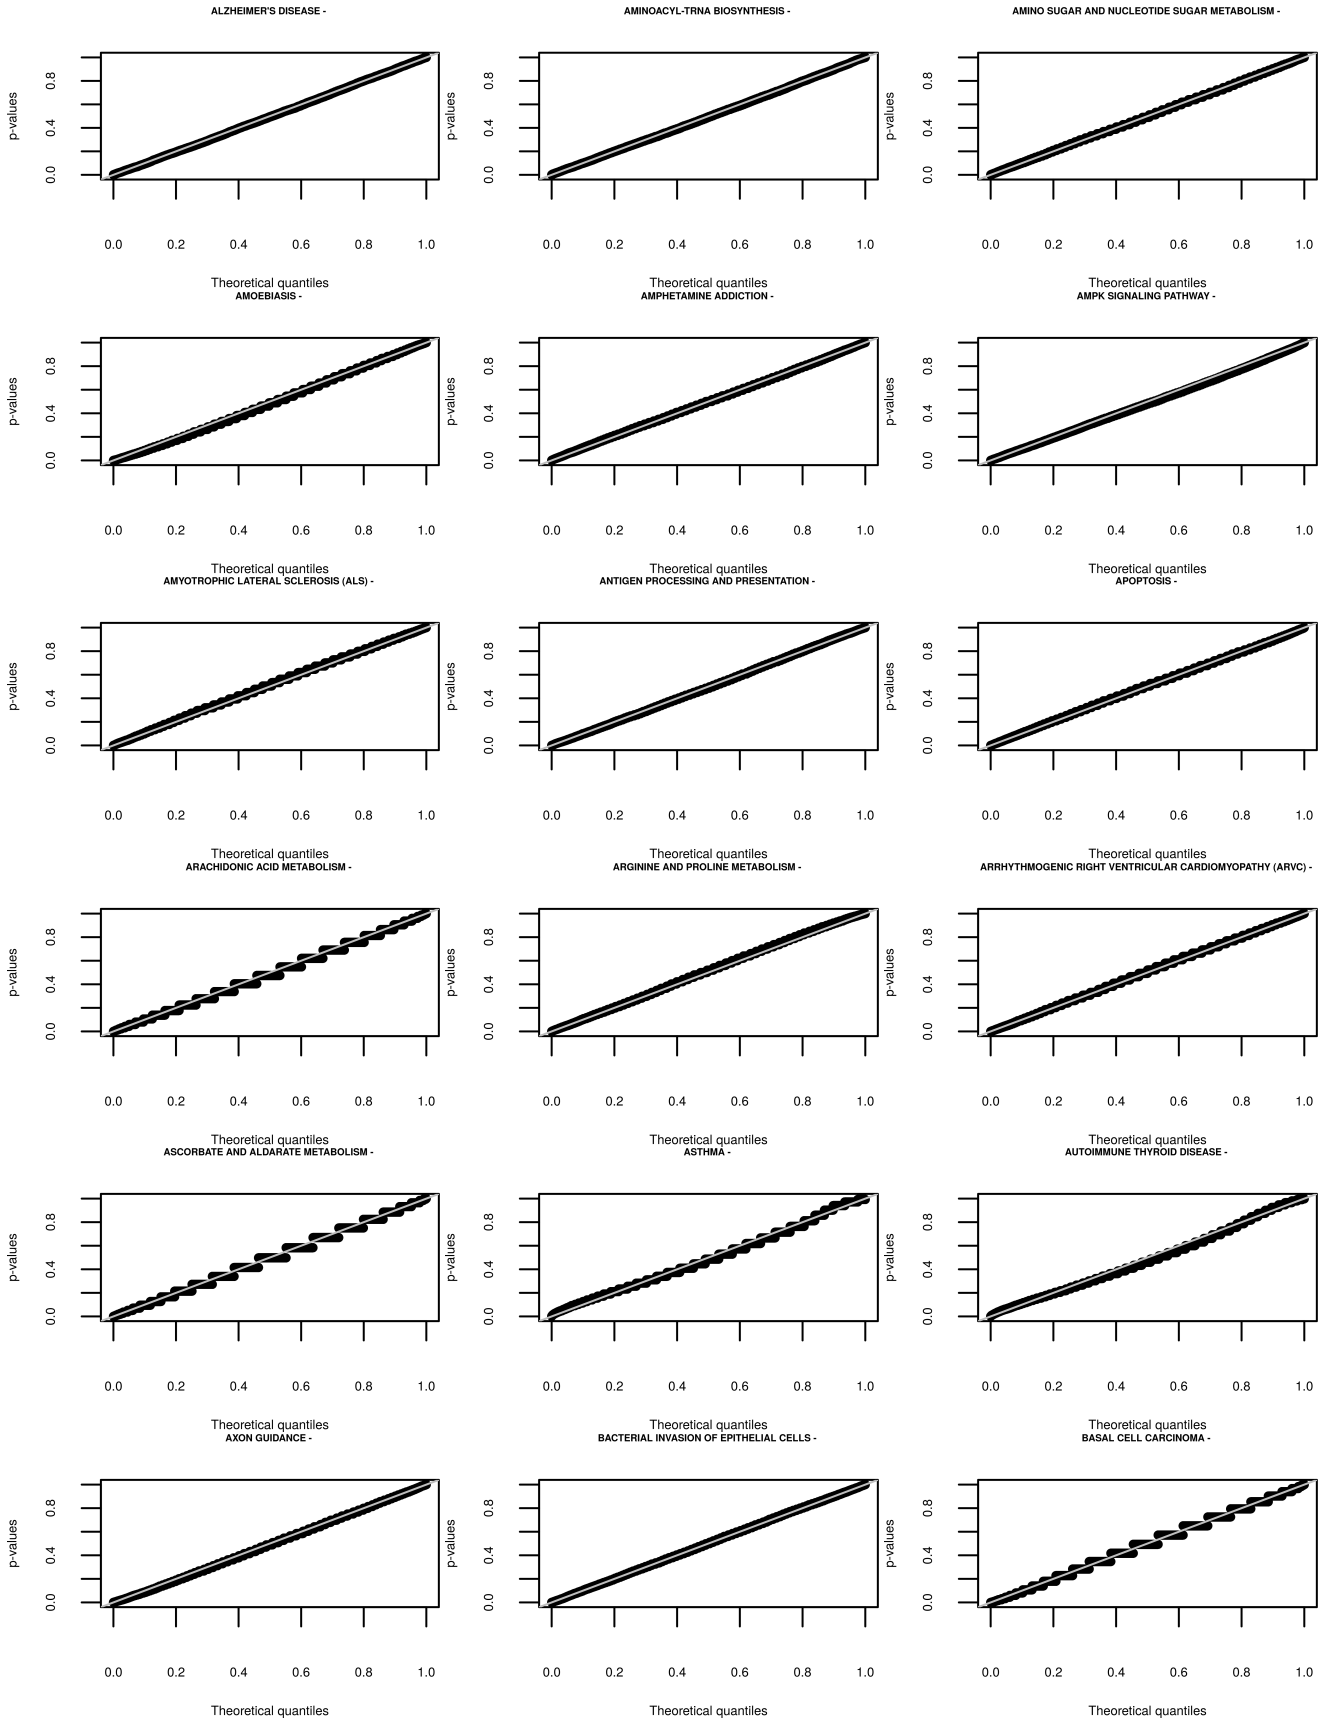

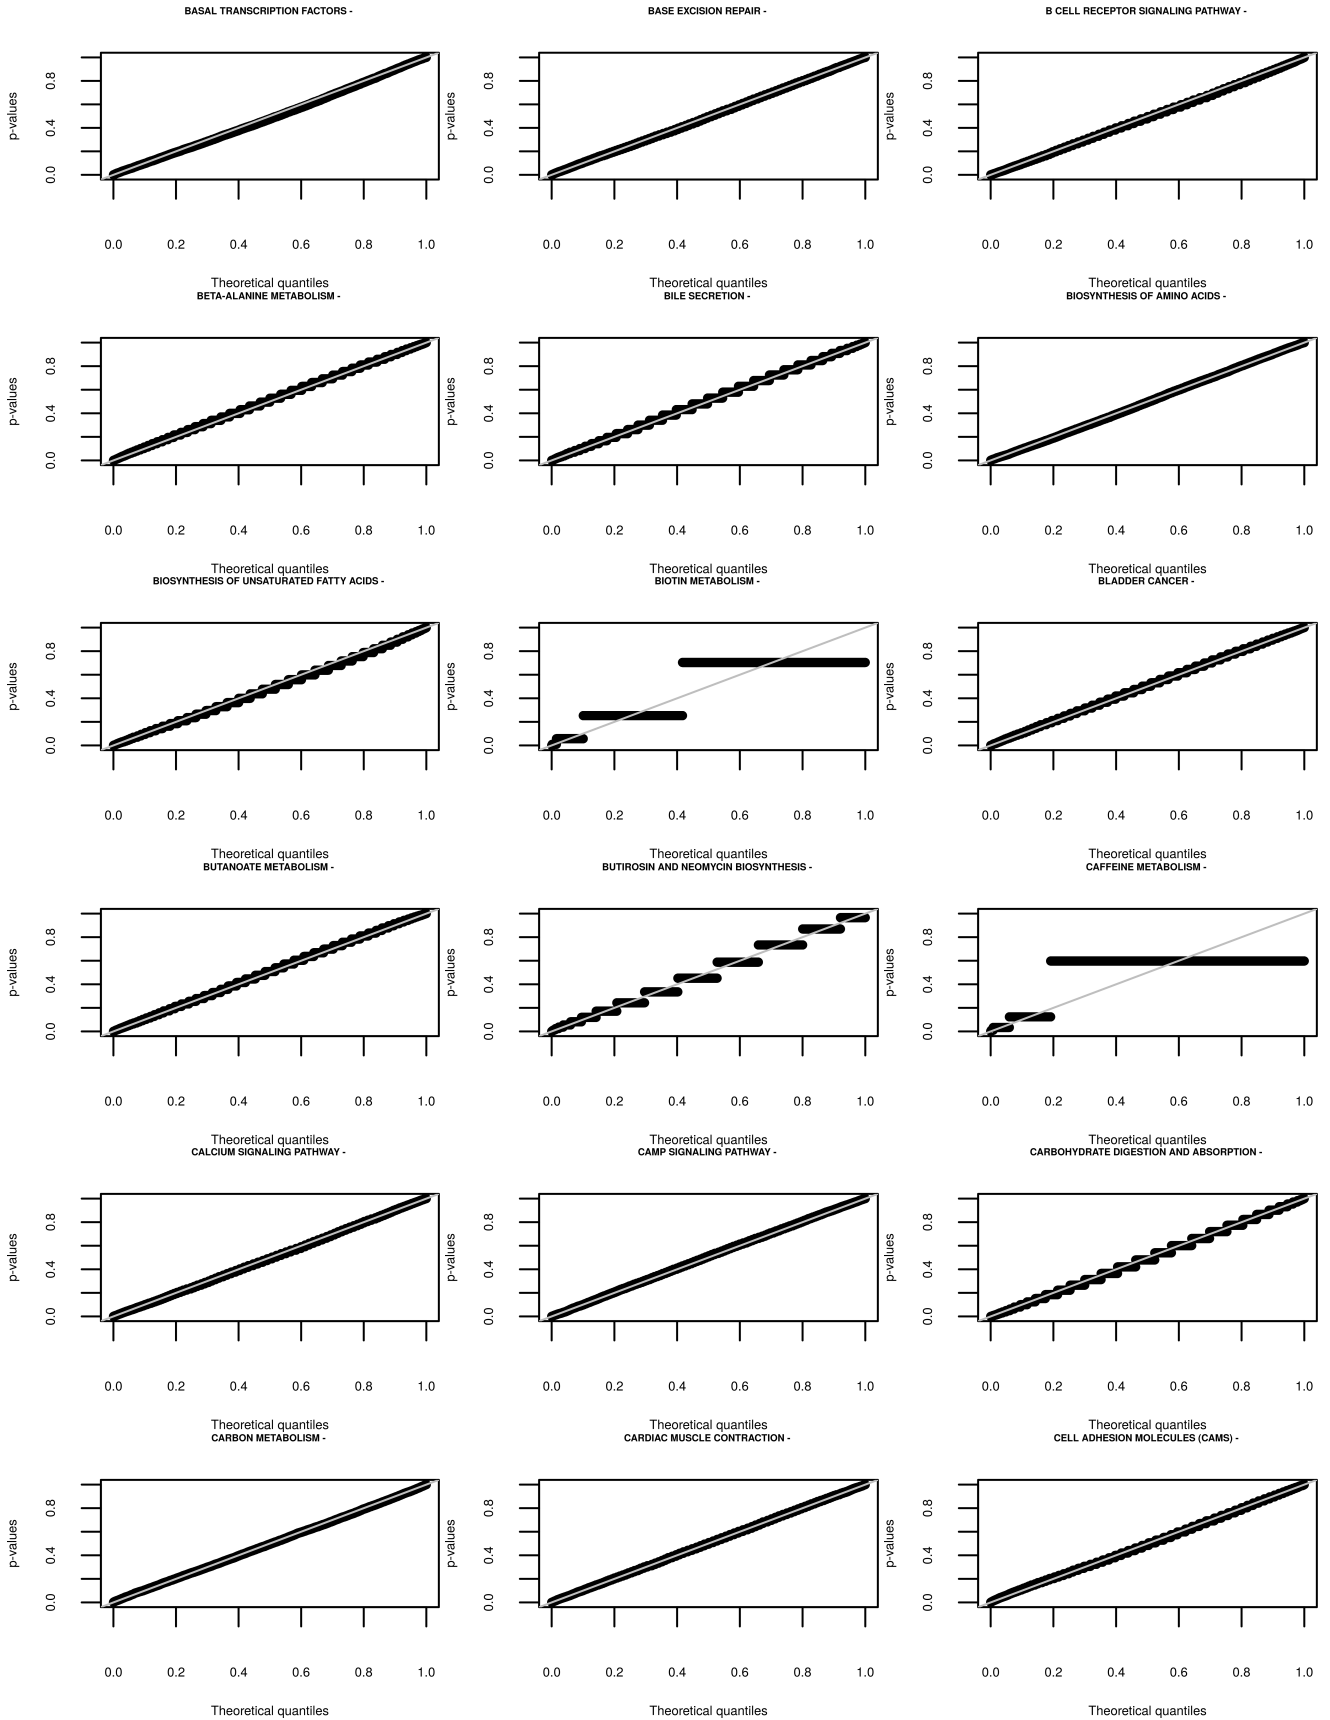

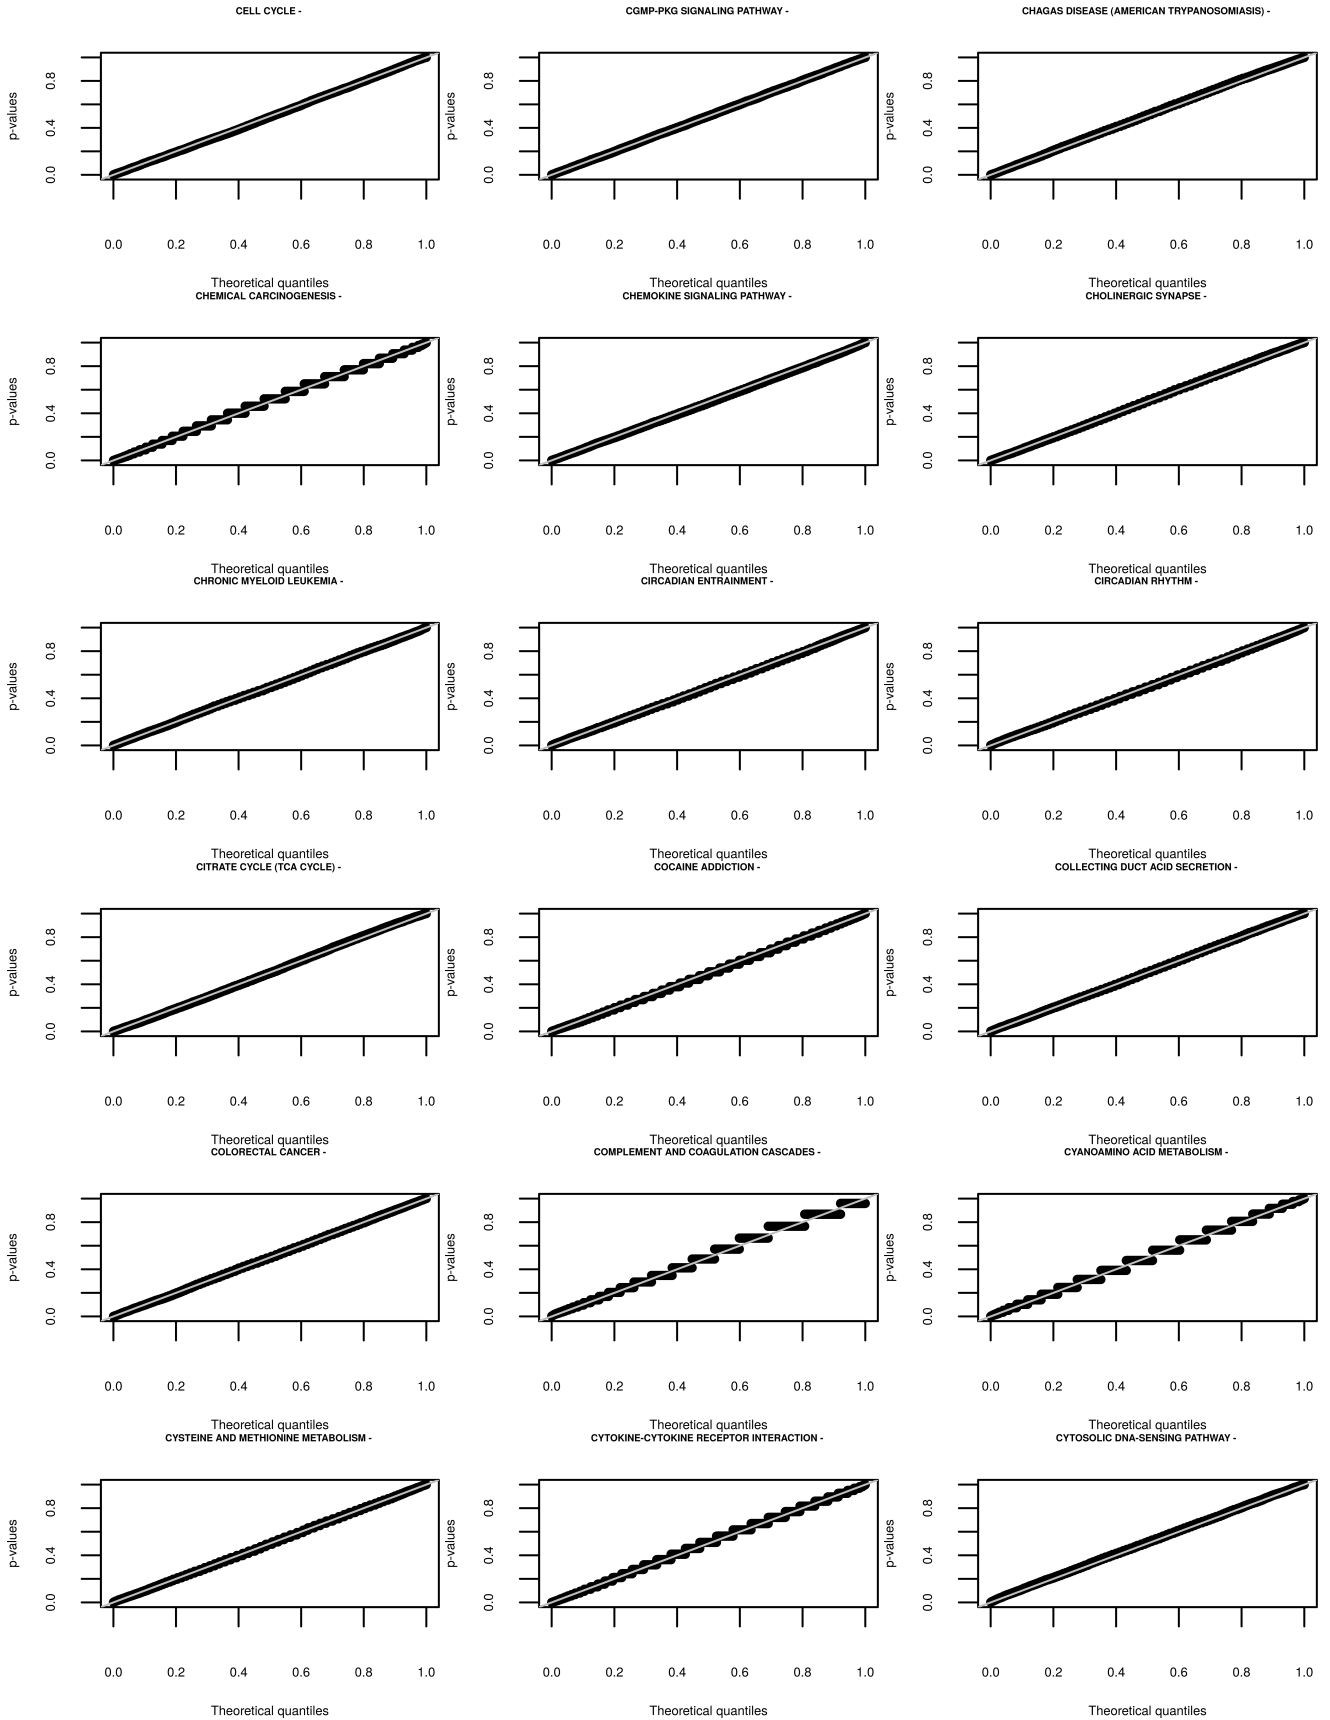

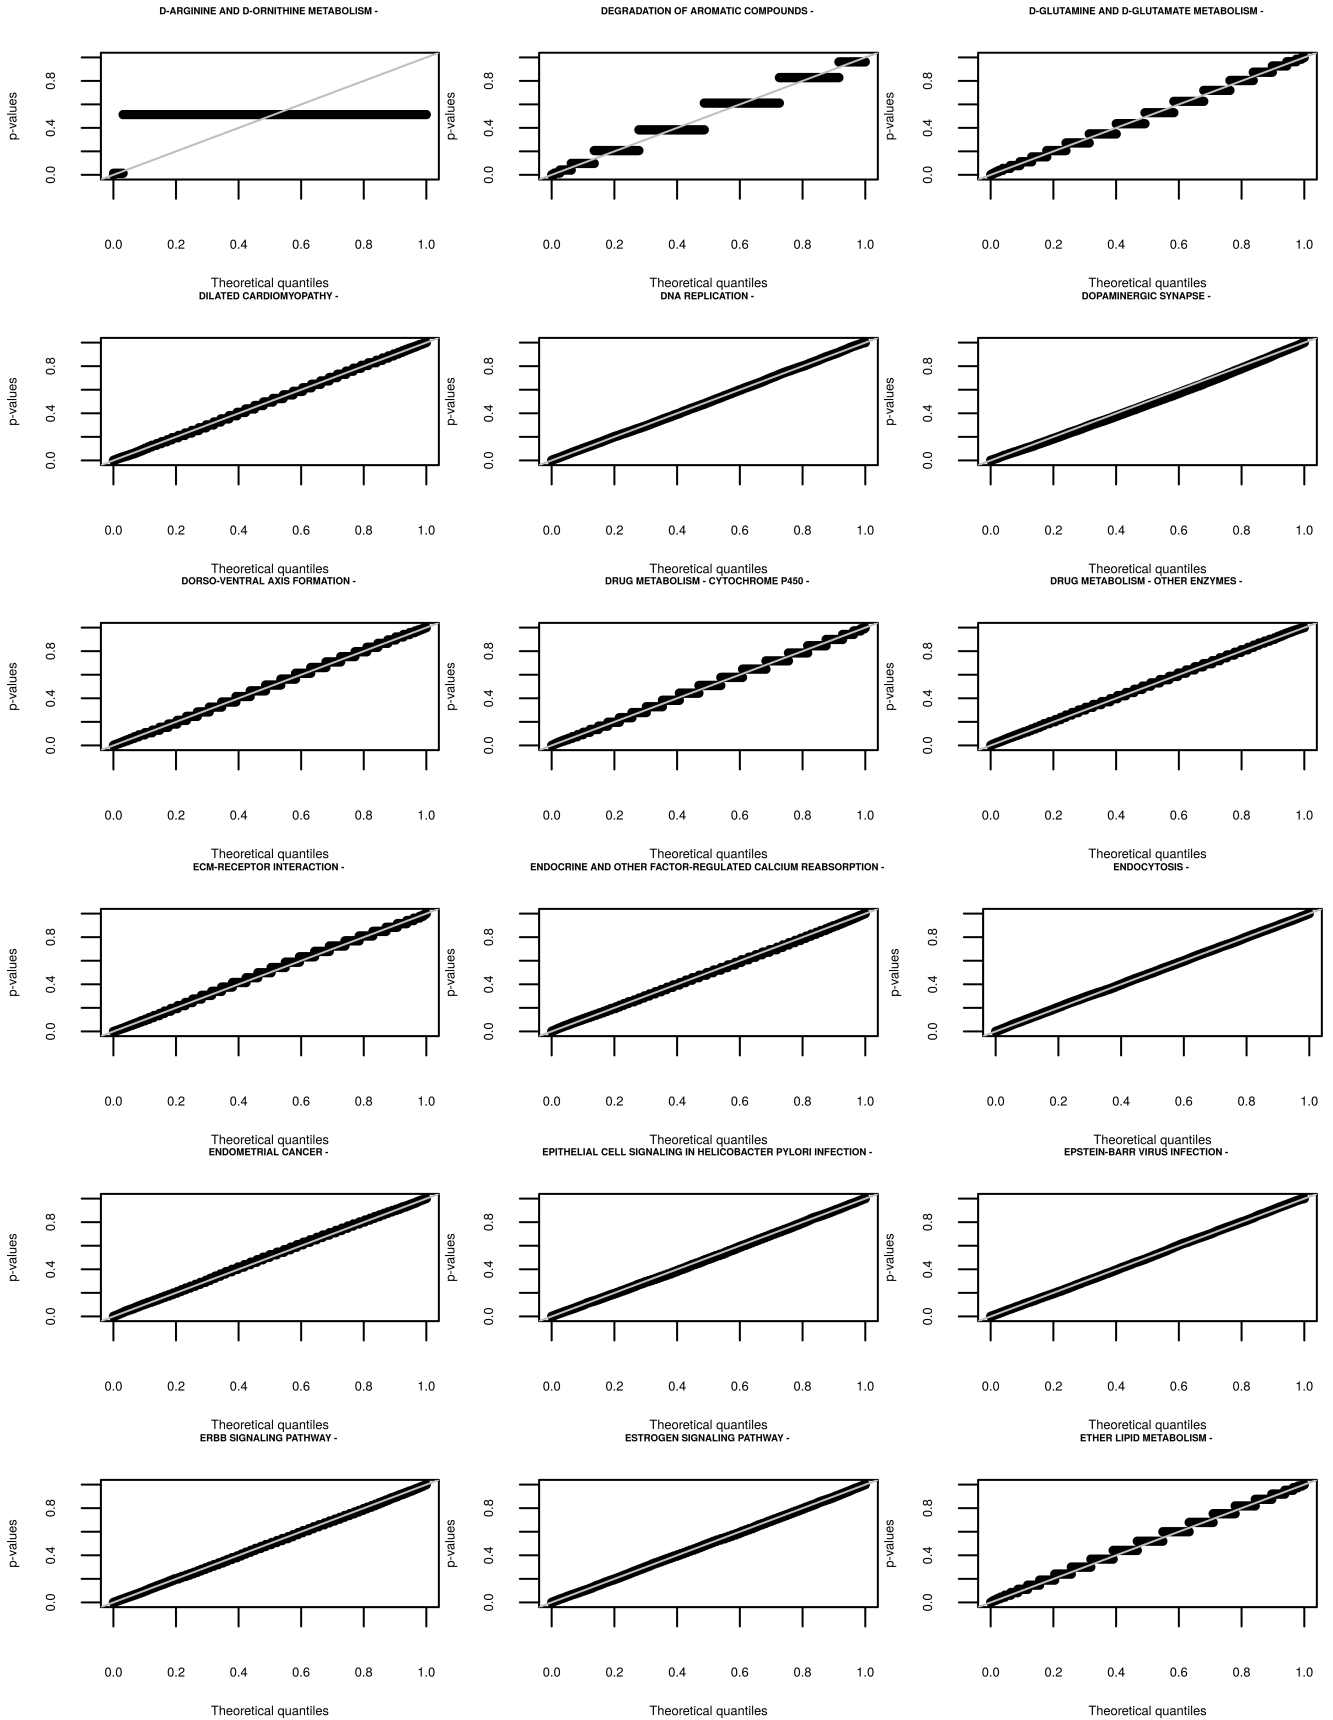

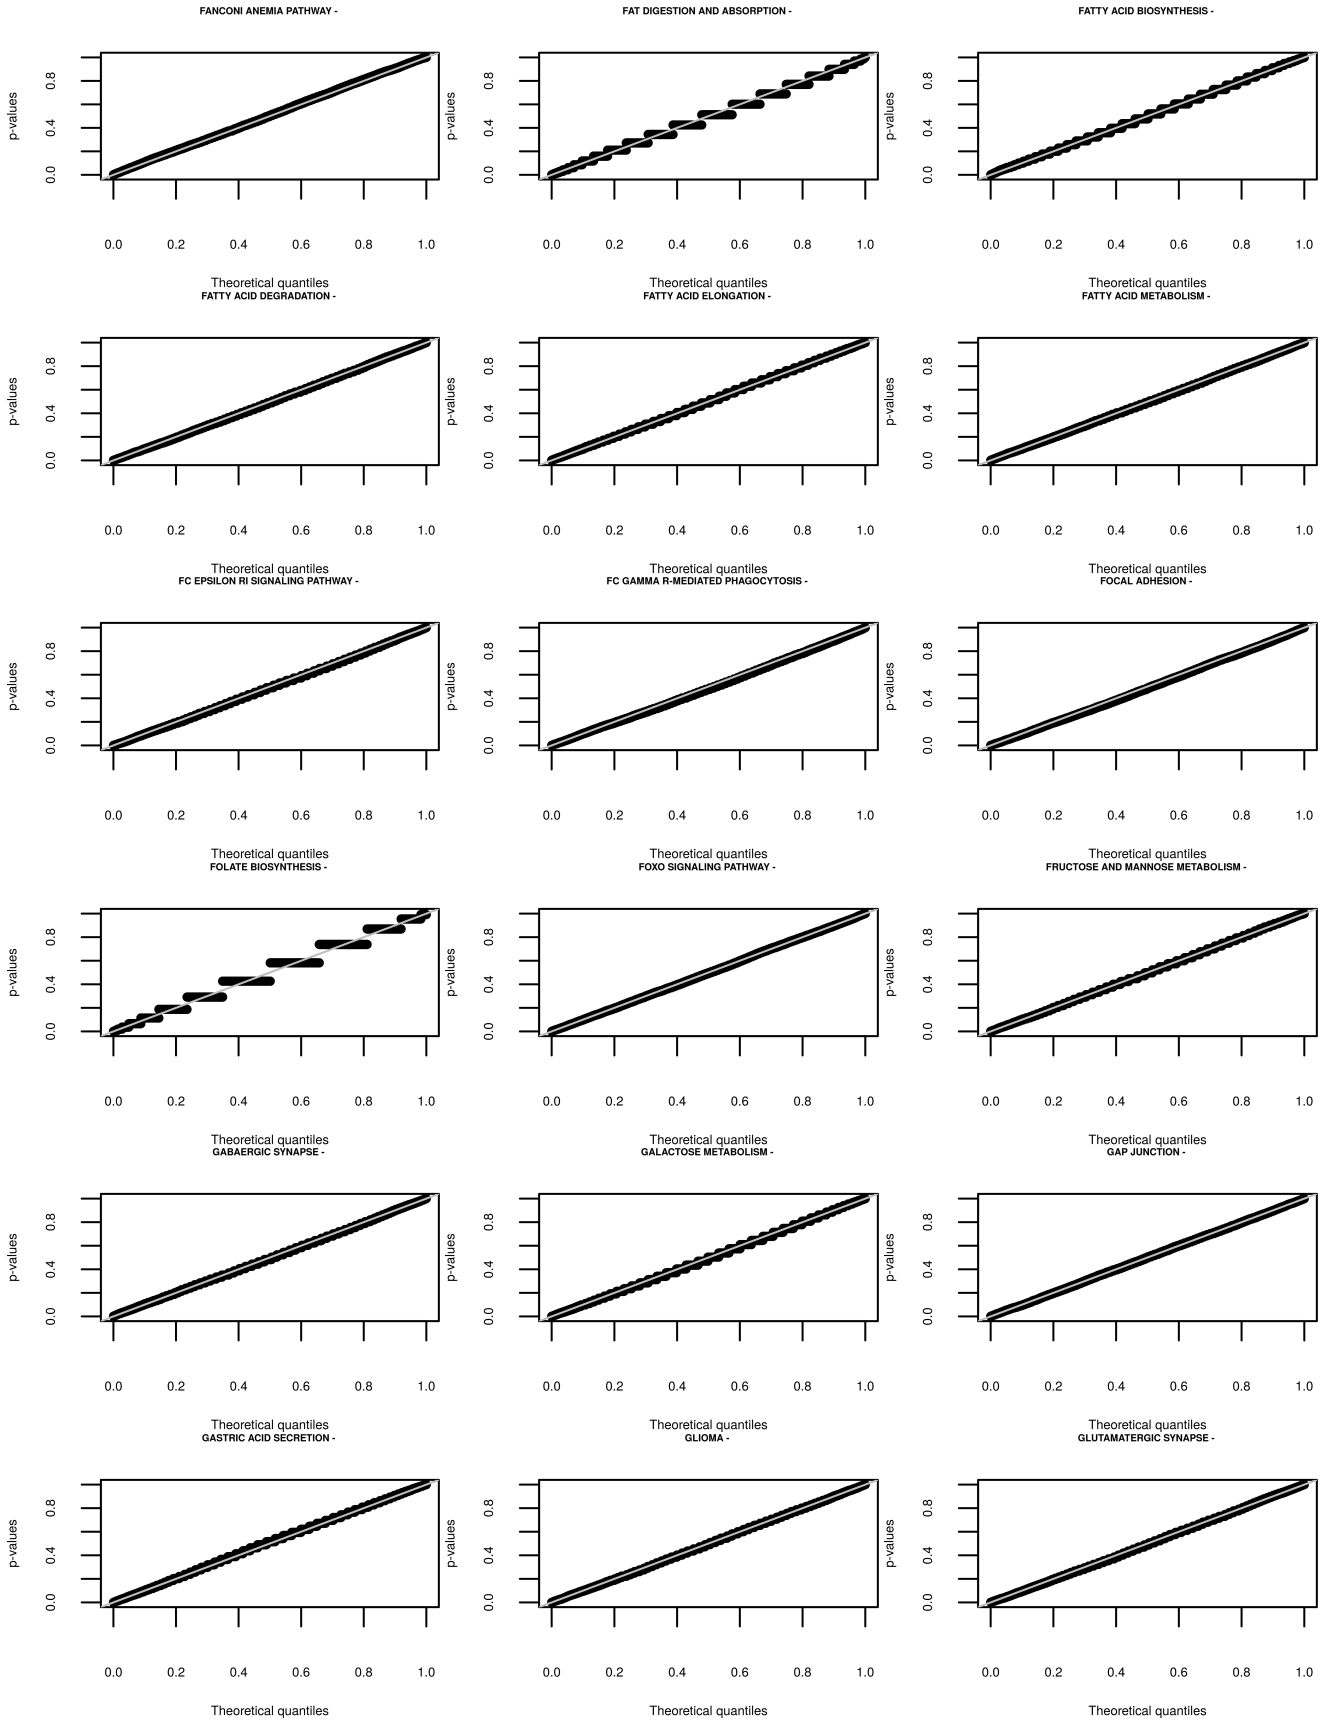



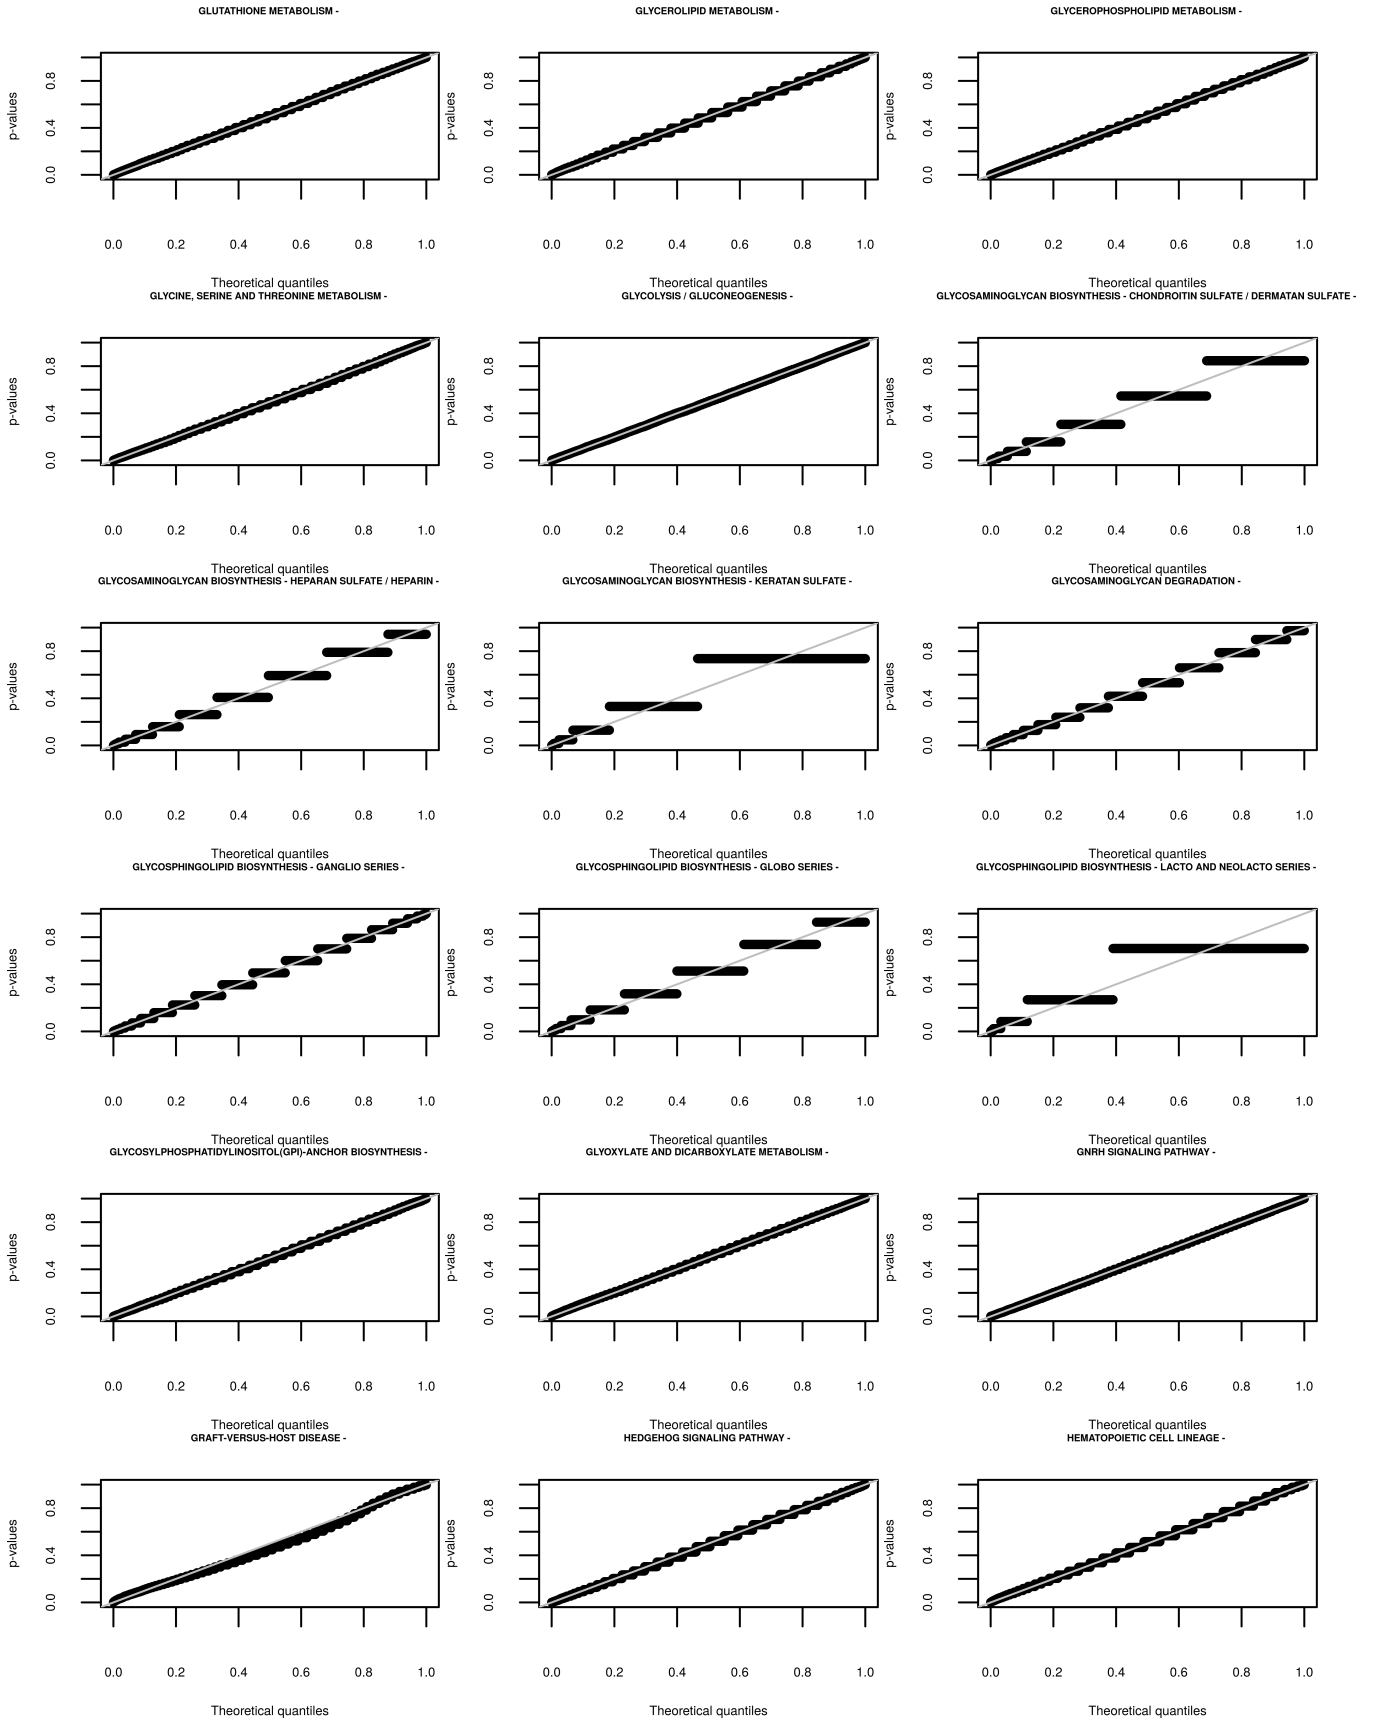

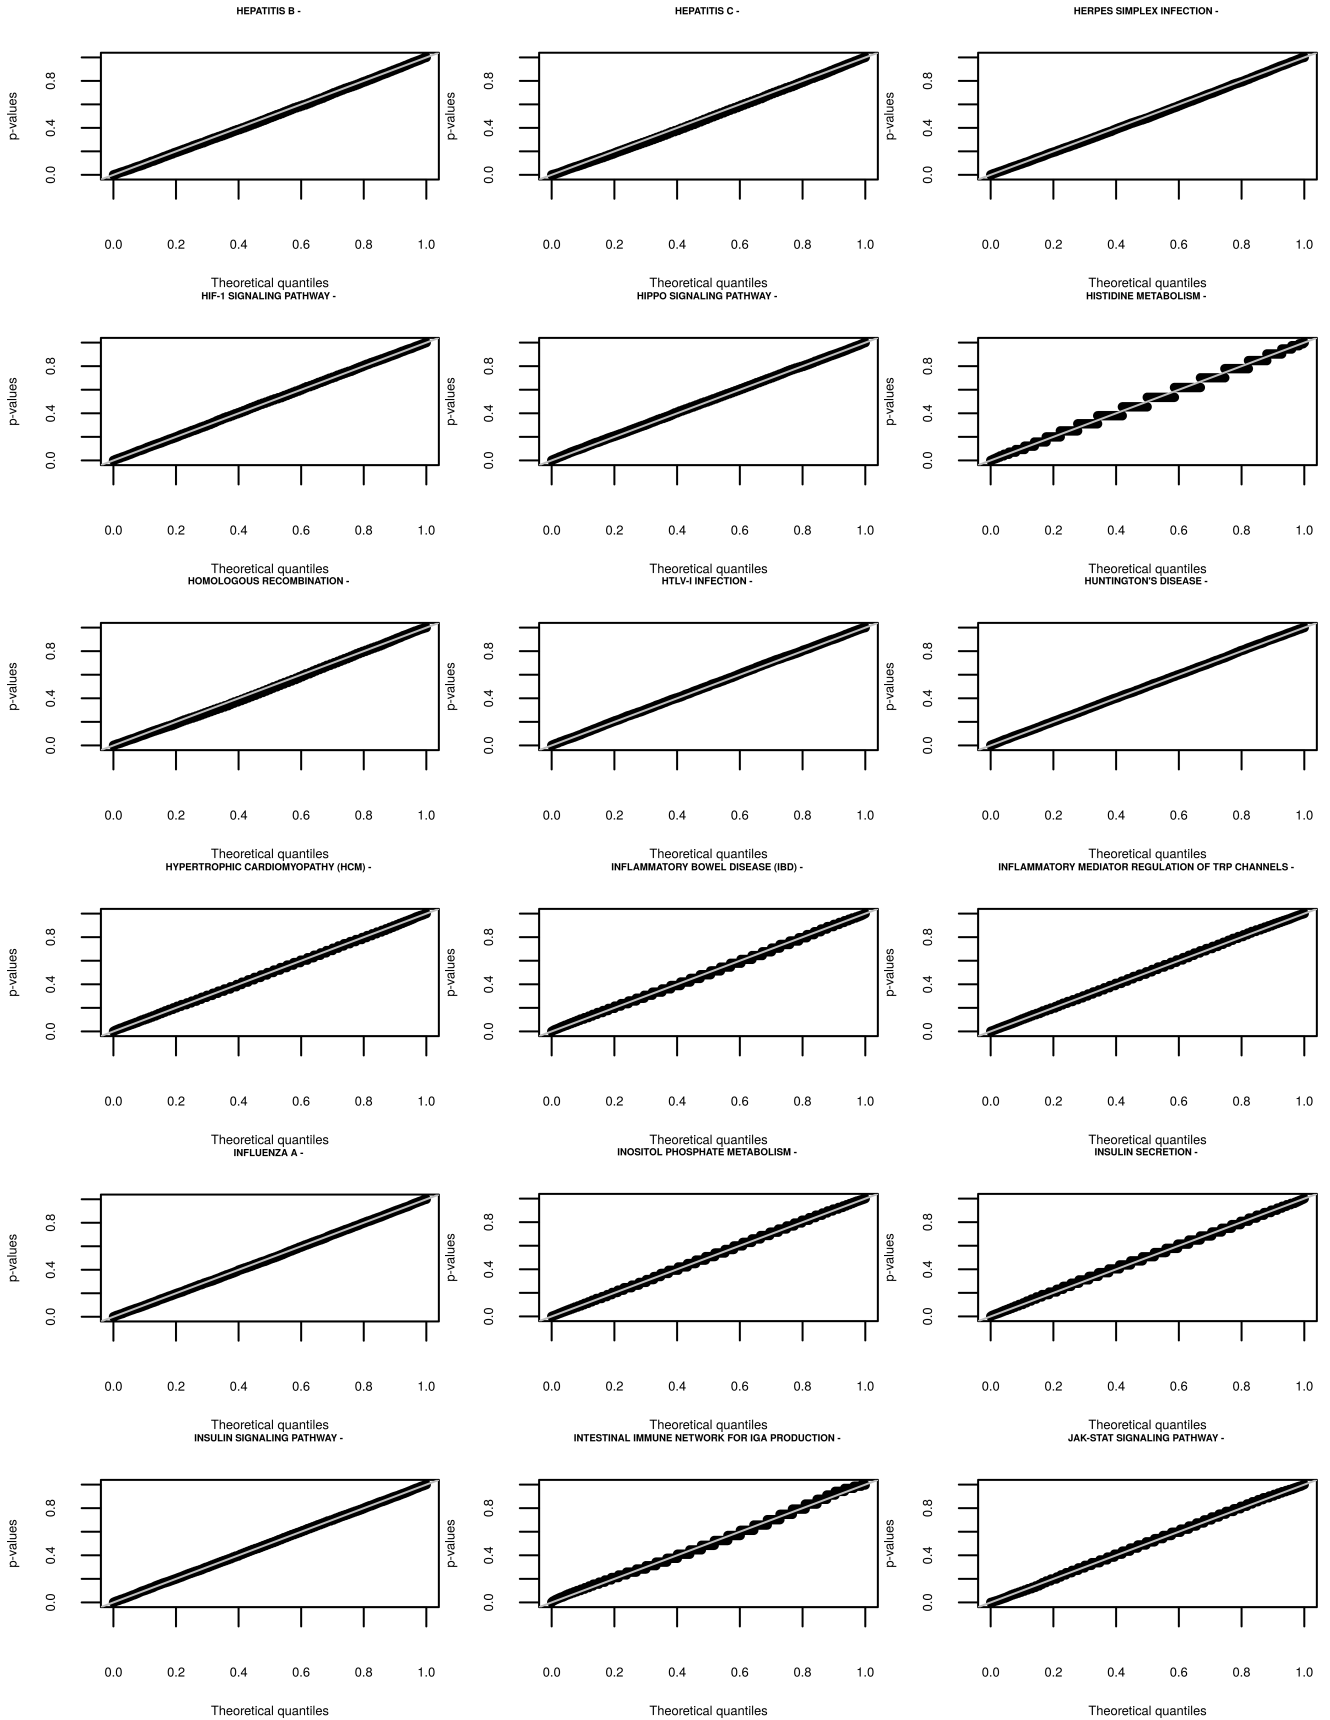

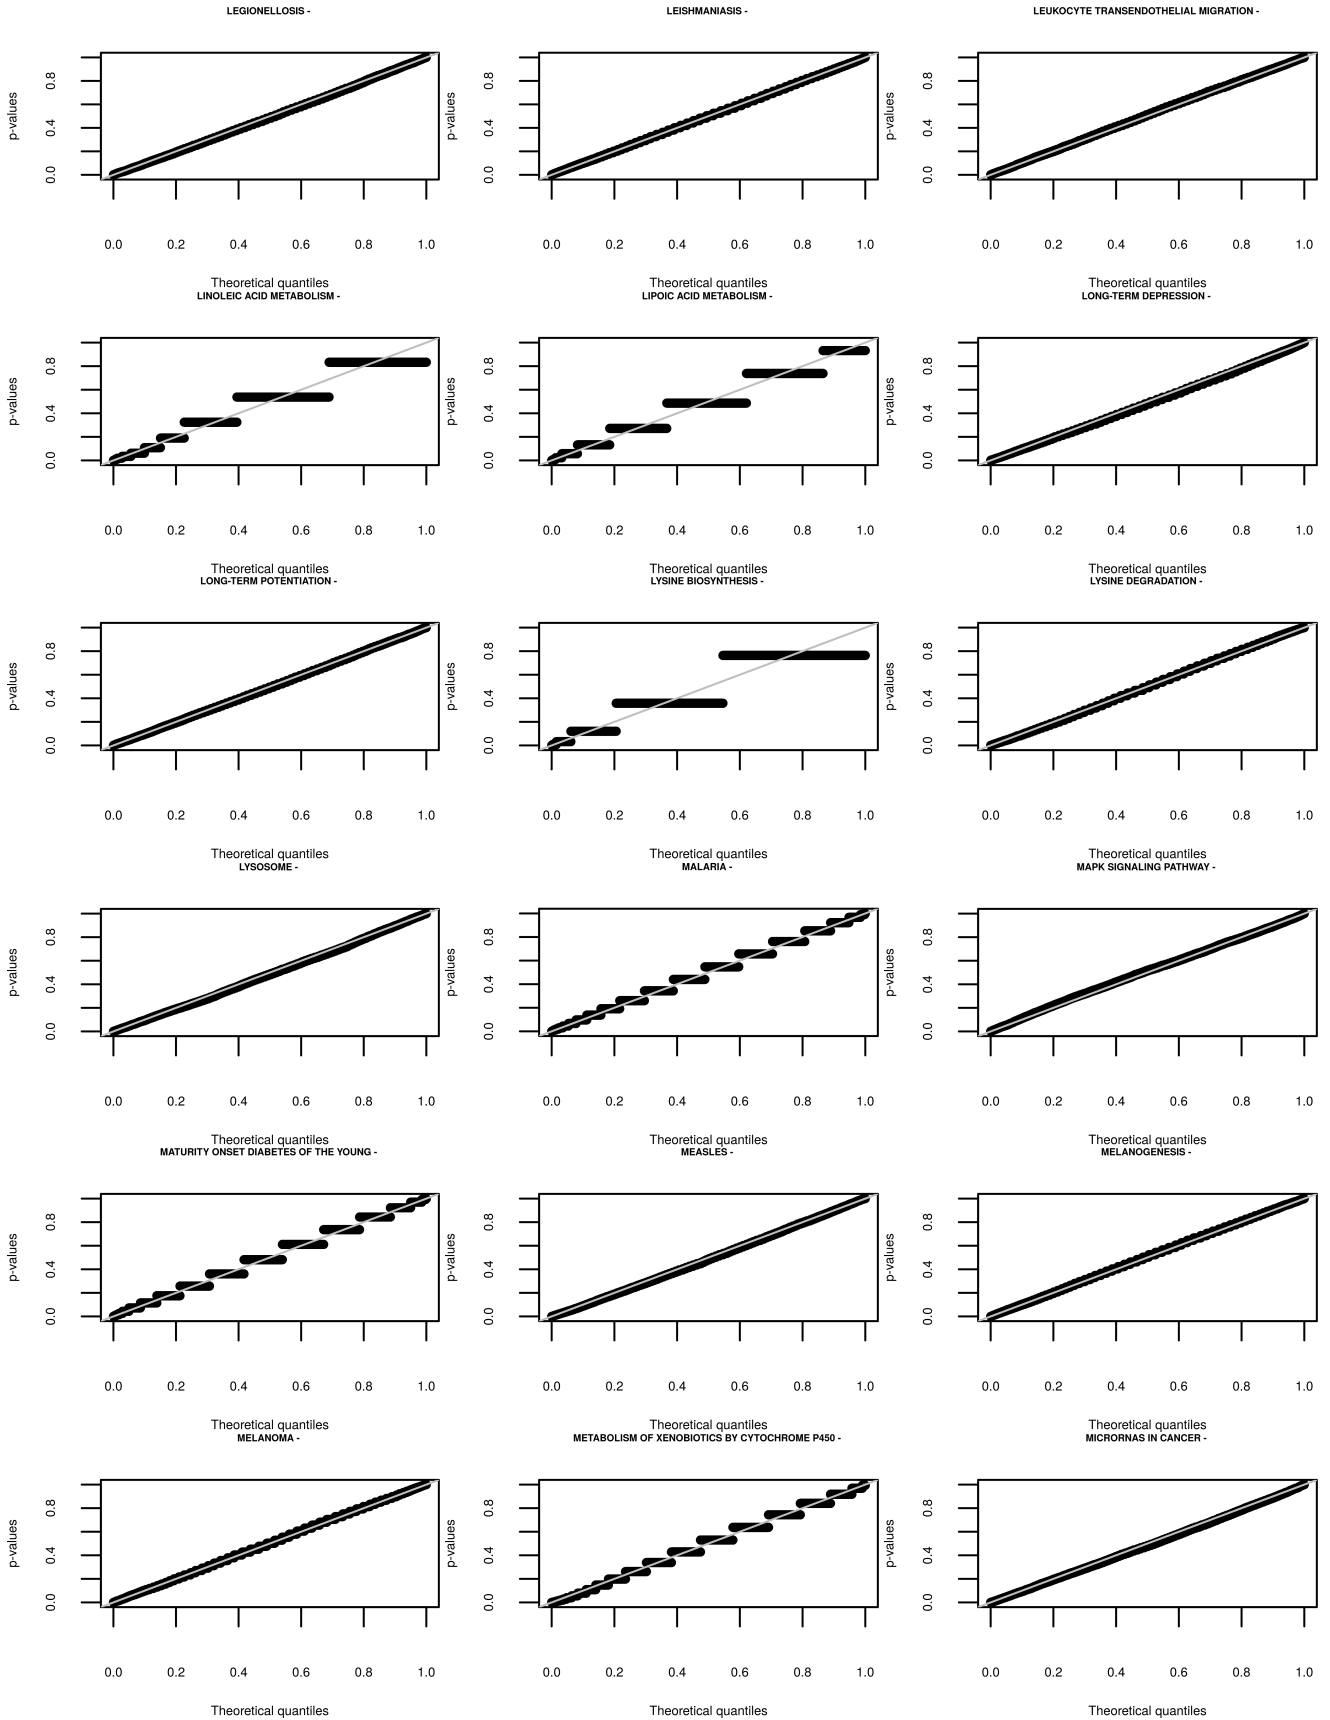

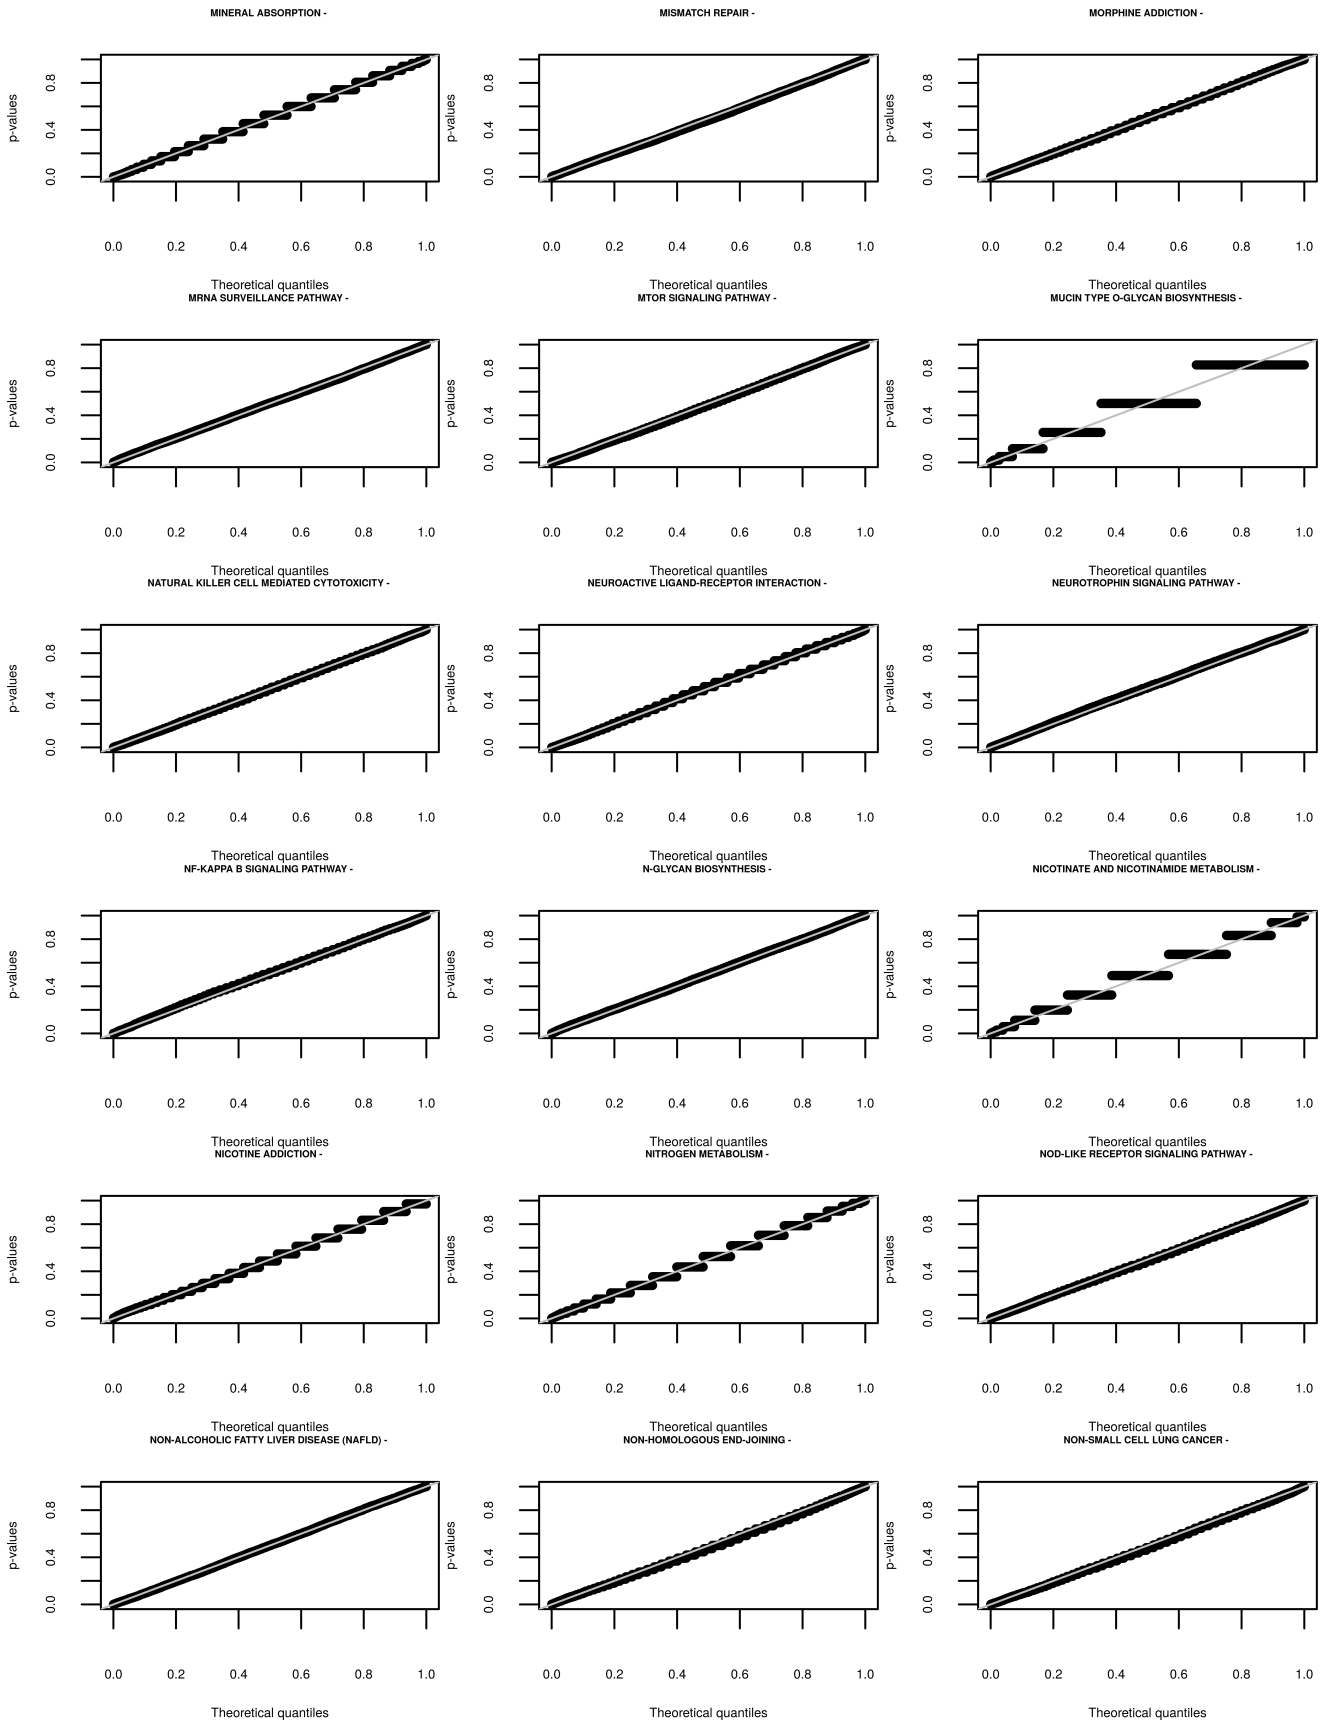

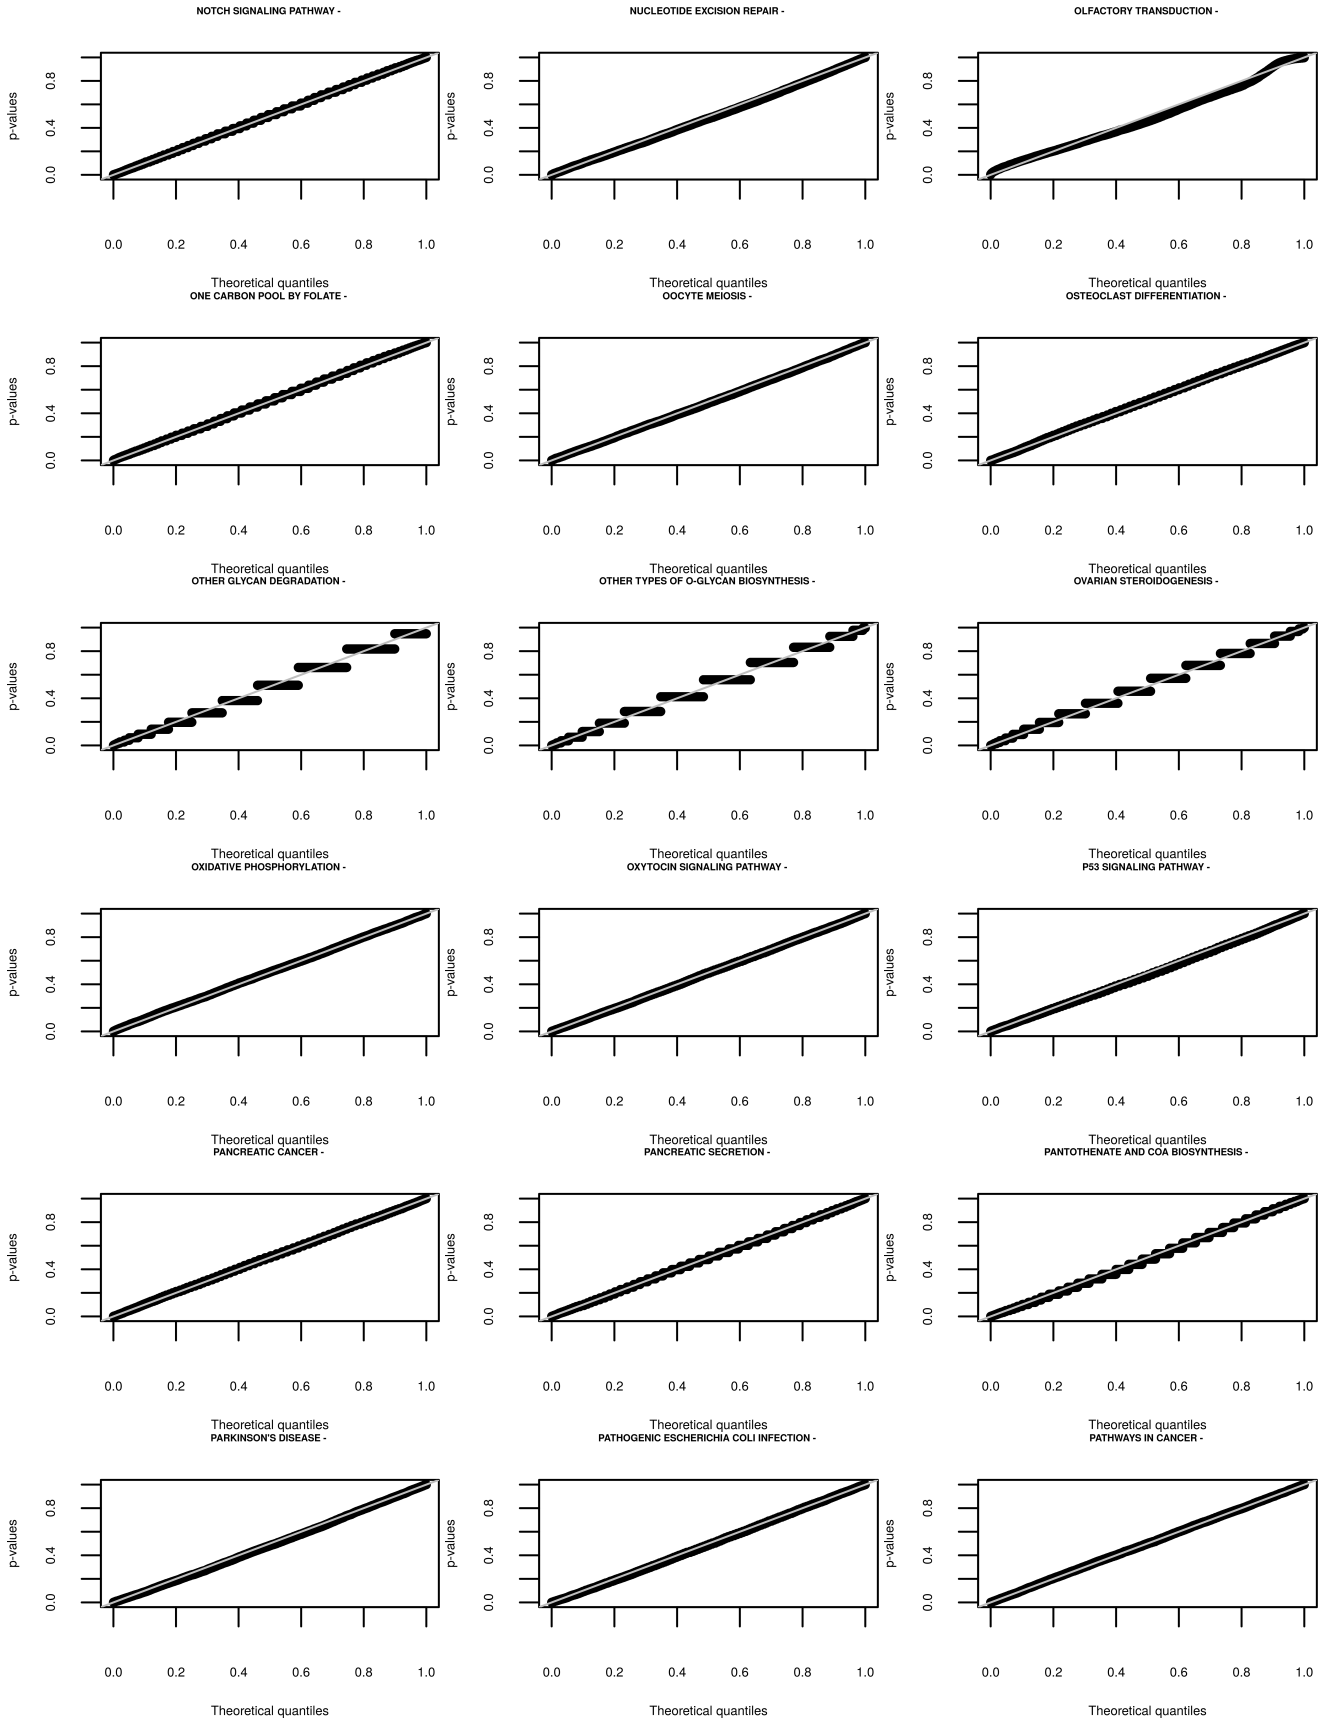

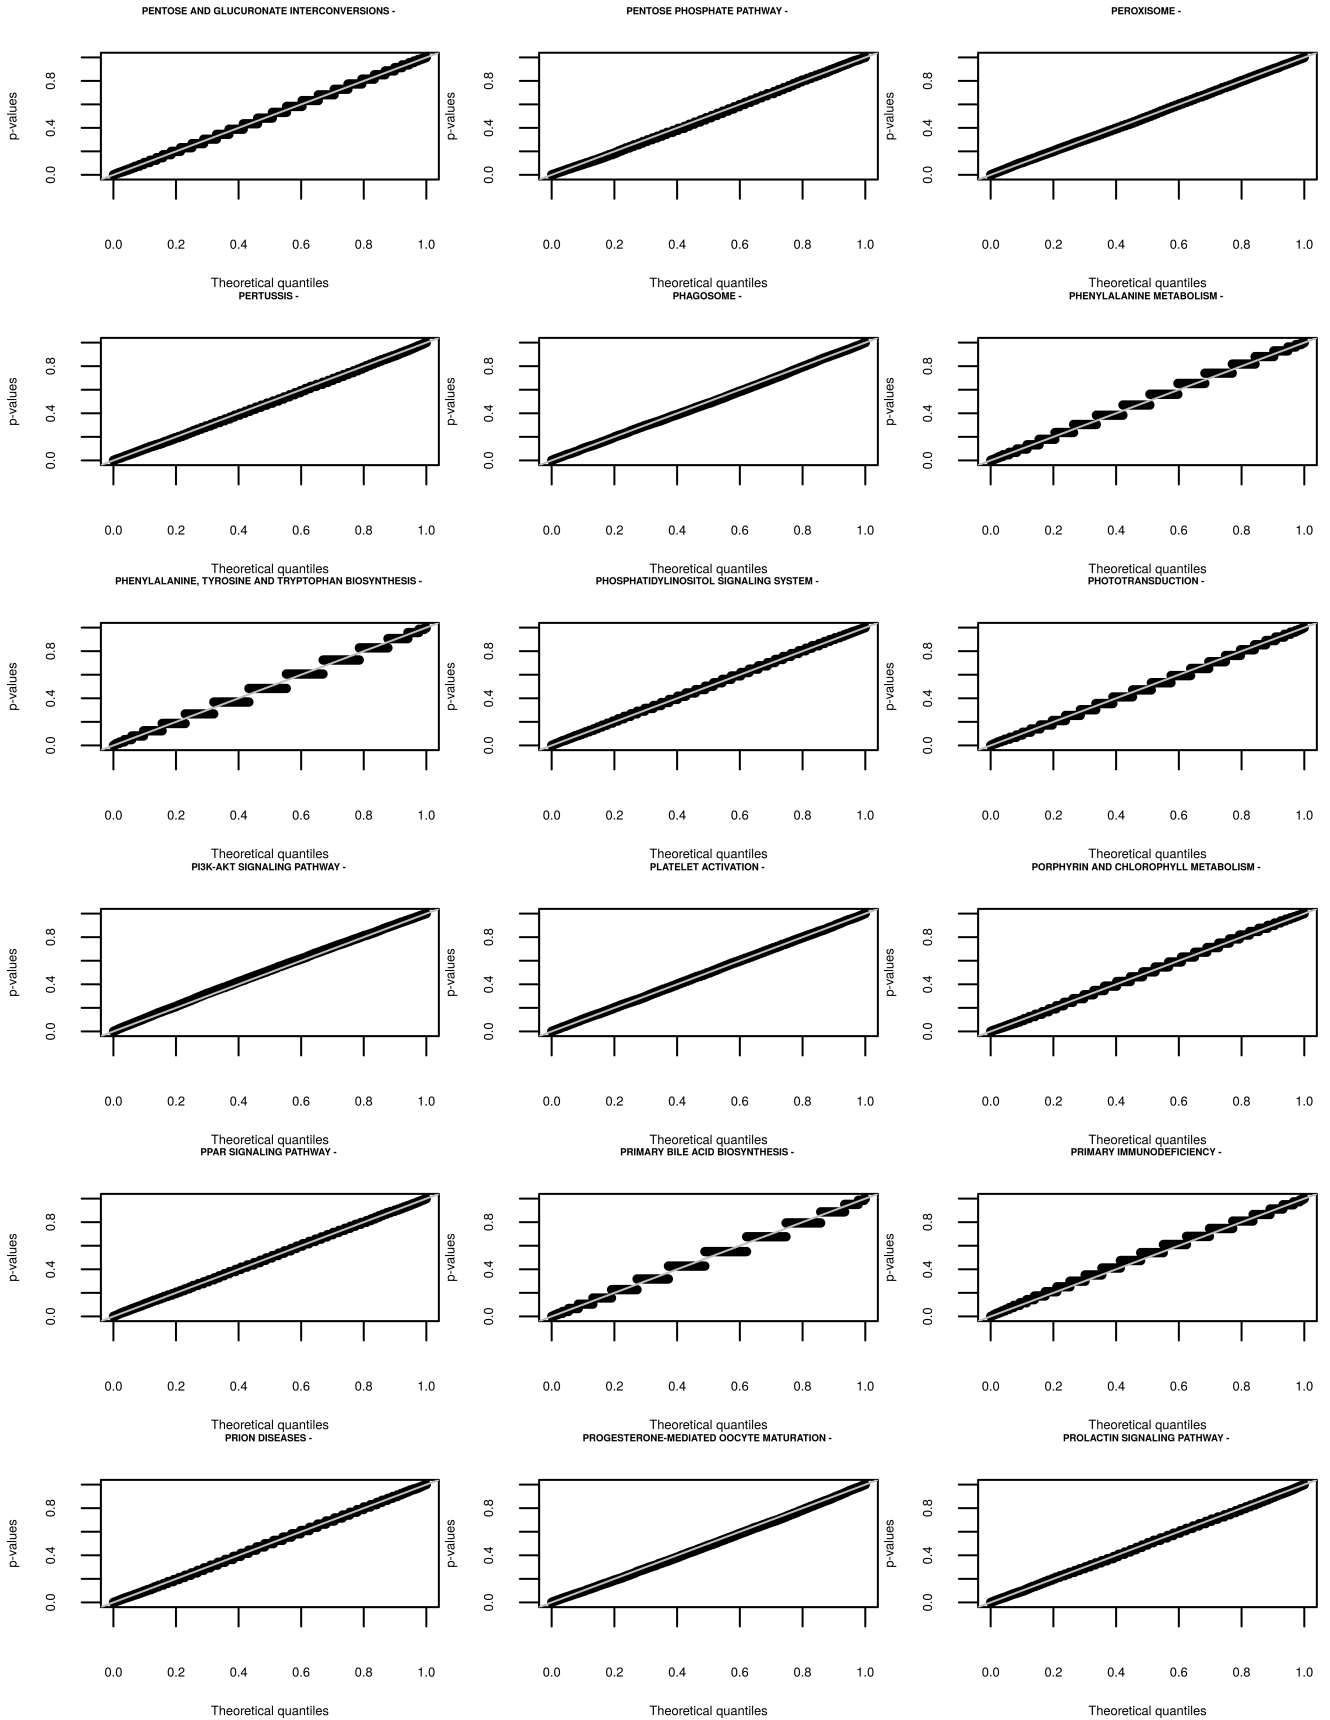

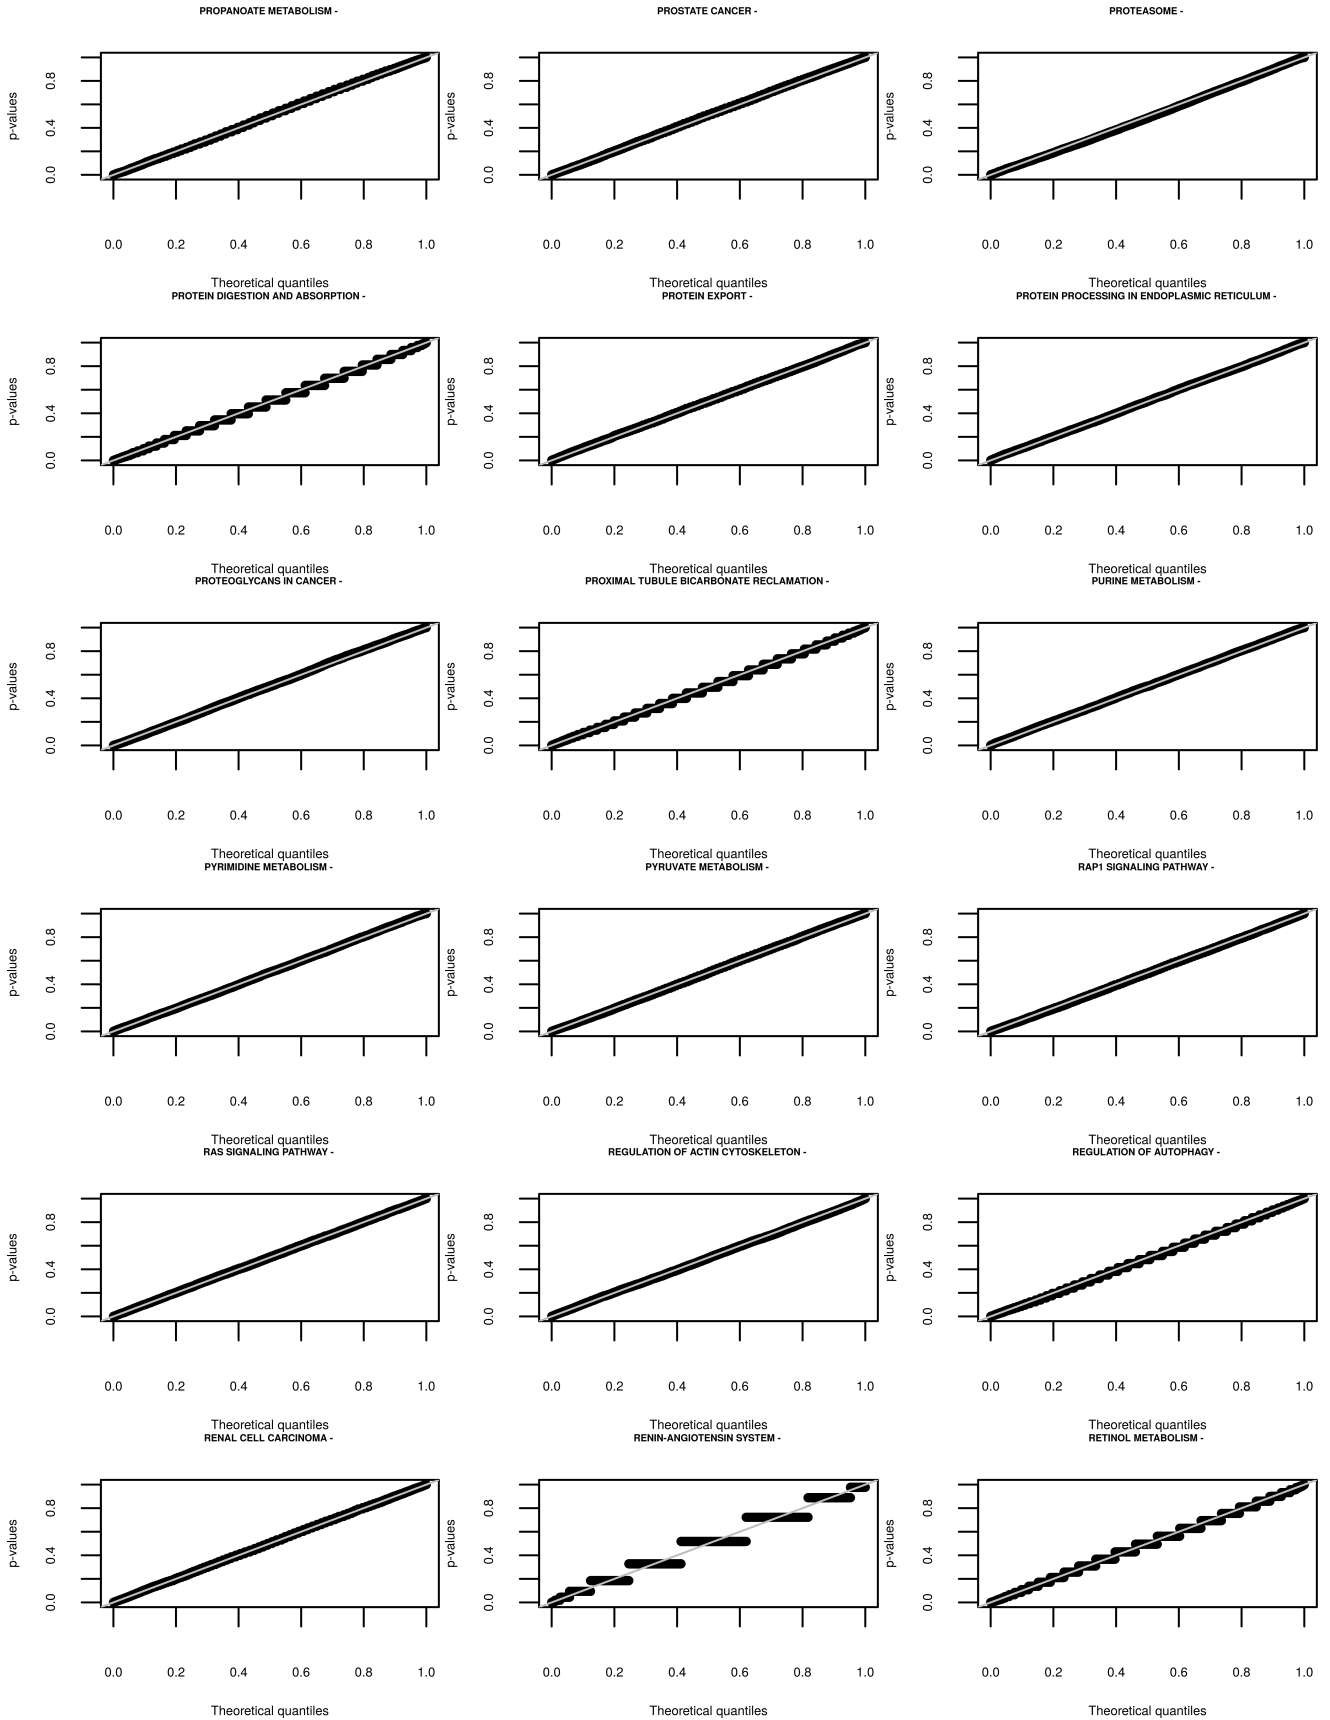

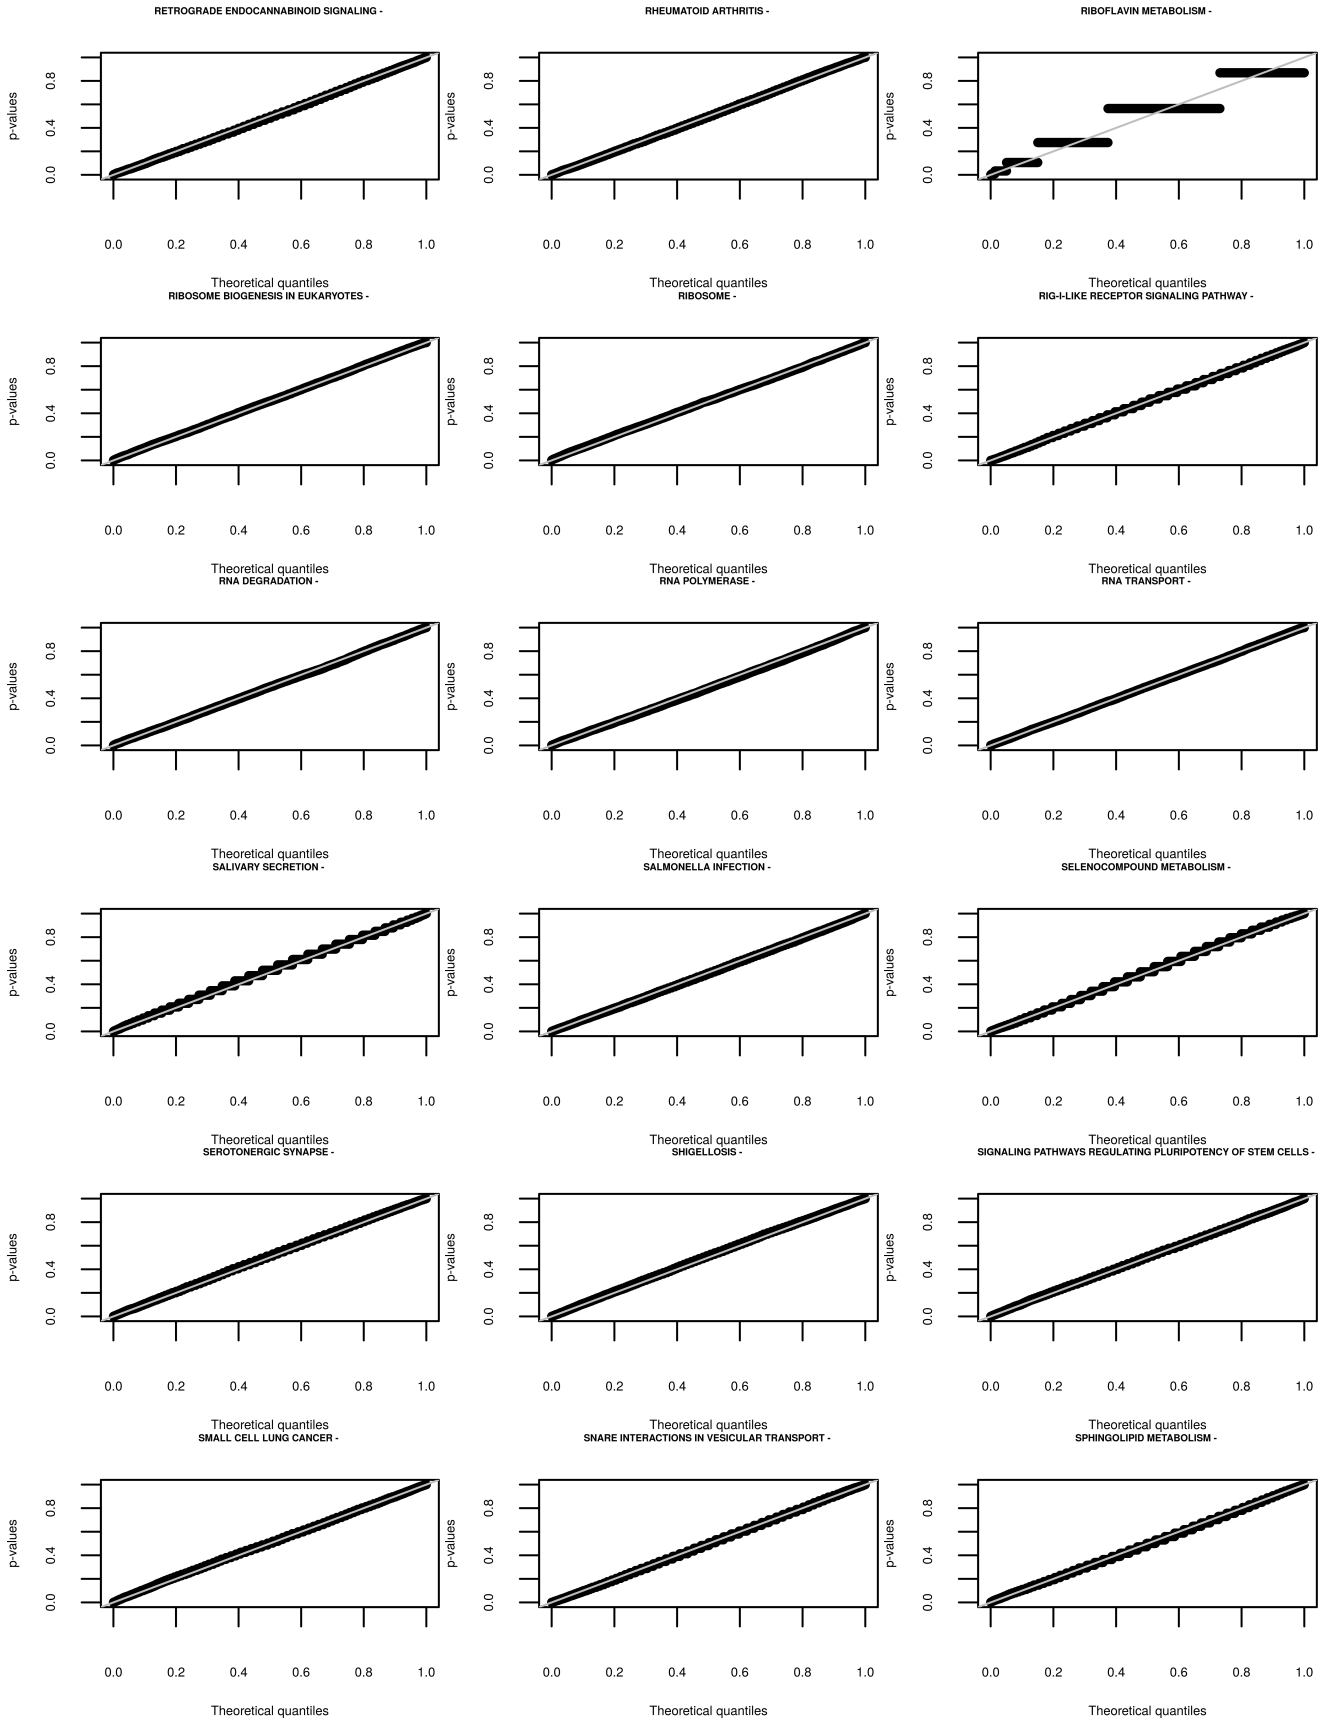



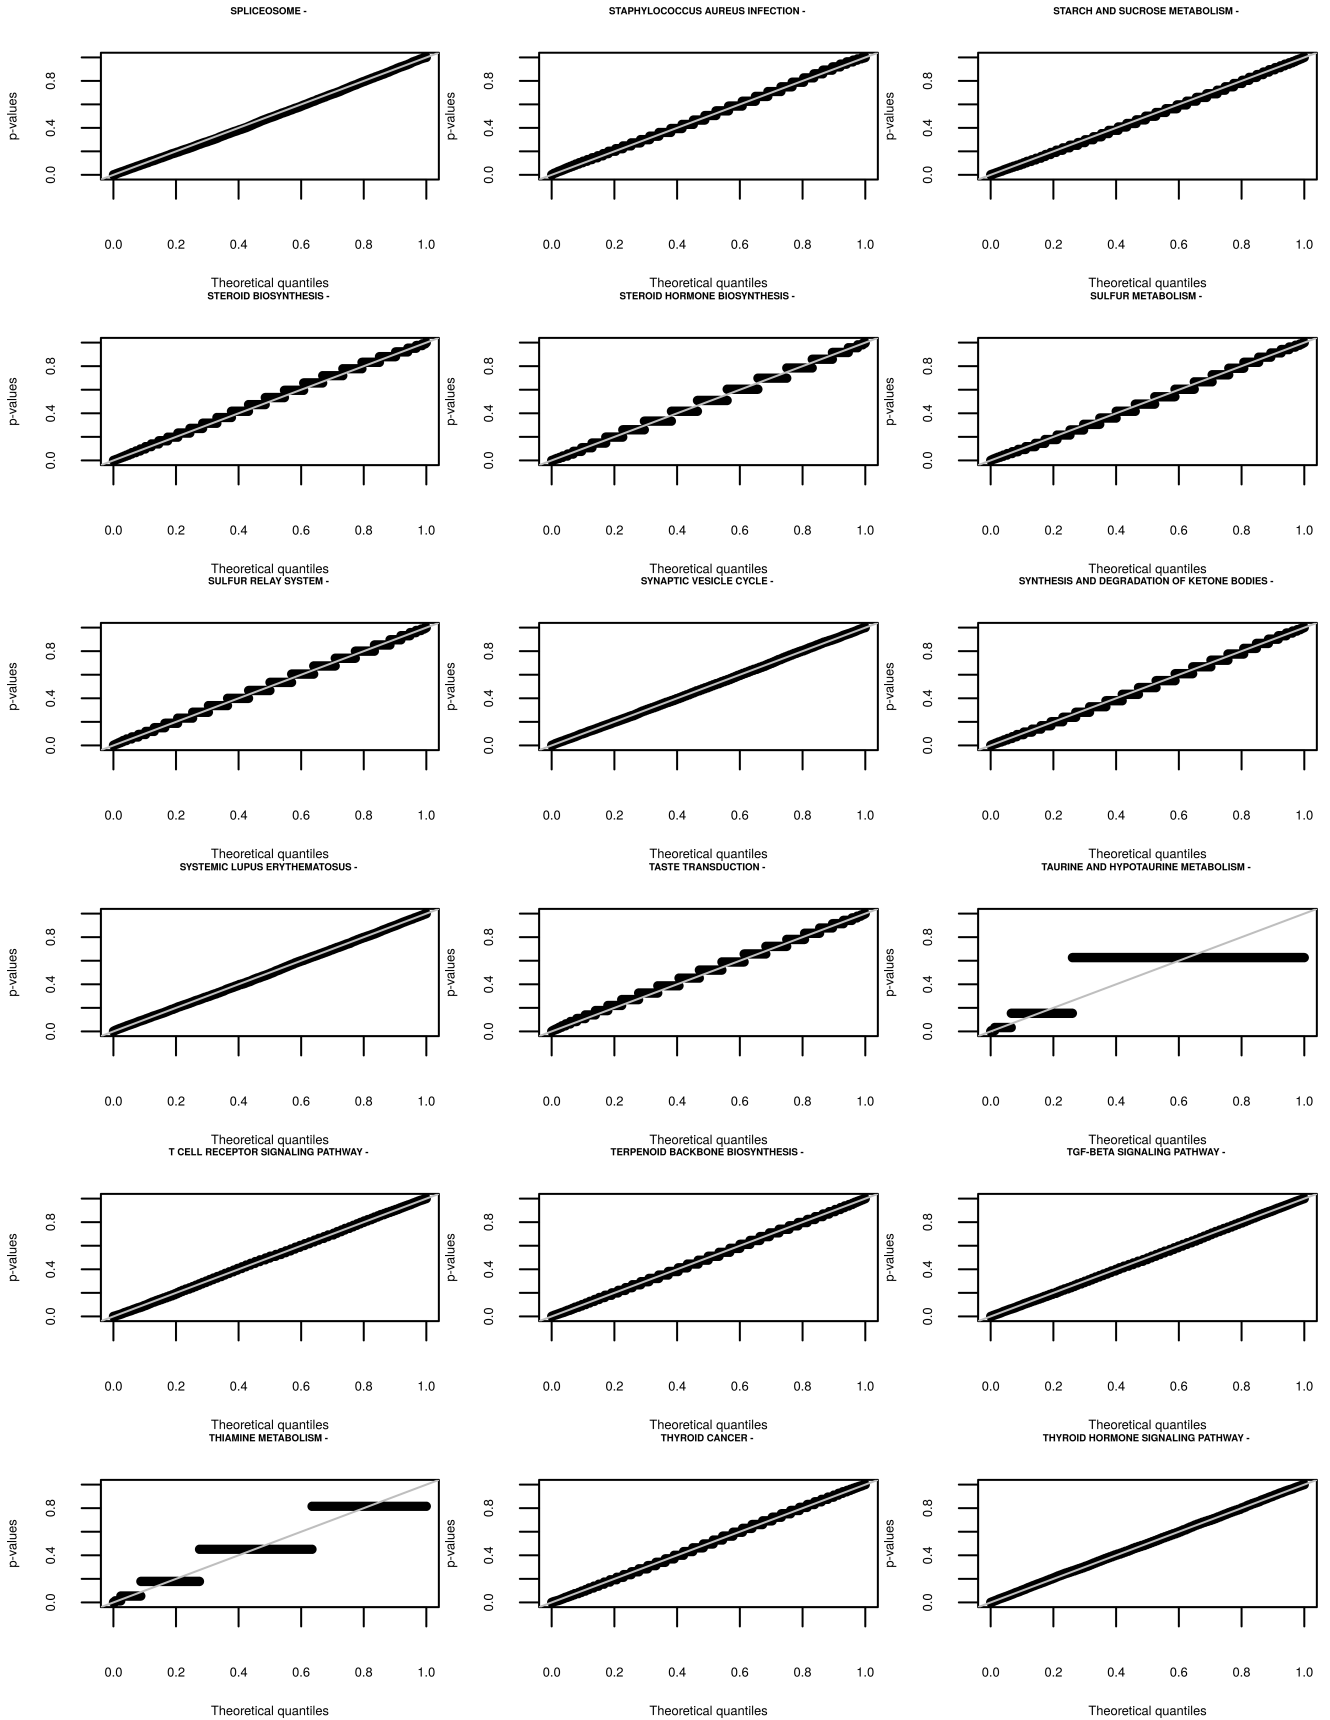



VIBRIO CHOLERAEE INFECTION -

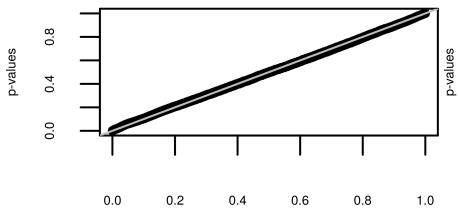

VIRAL CARCINOGENESIS -

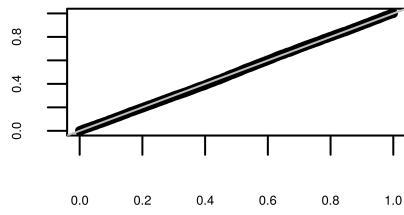

VIRAL MYOCARDITIS -

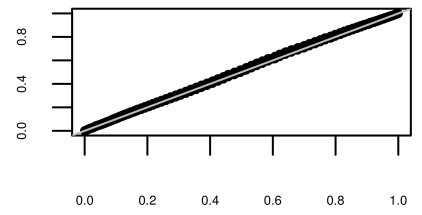

Theoretical quantiles  
VITAMIN B6 METABOLISM -

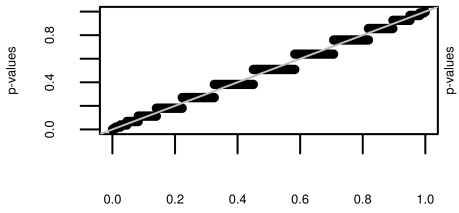

Theoretical quantiles  
VITAMIN DIGESTION AND ABSORPTION -

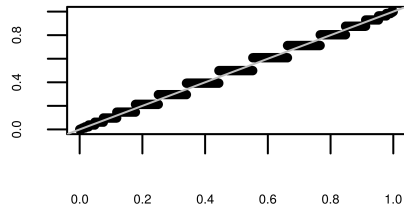

Theoretical quantiles  
WNT SIGNALING PATHWAY -

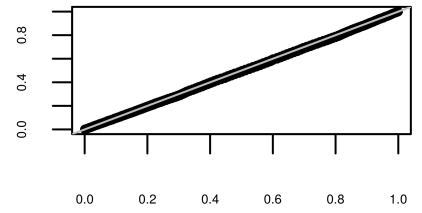

Supplement: 41598_2020_70239_MOESM1_ESM.pdf [file 41598_2020_70239_MOESM1_ESM.pdf]
